# Supplementary material for: Parental body mass index and offspring childhood body size and eating behaviour: causal inference via parental comparisons and extended children of twins structural equation modelling
Source: bioRxiv or medRxiv preprint supplement (doi:10.1101/2023.02.06.23284912), 2023-02-08
Supplement: Supplementary file [file media-1.pdf]

1 **Parental body mass index and offspring childhood body size and eating behaviour: causal inference via parental**  
2 **comparisons and extended children of twins structural equation modelling**

3  
4 **Supplementary information**  
5

6 Tom A Bond<sup>1,2,3,4,\*</sup>, Tom A McAdams<sup>5,6</sup>, Nicole M Warrington<sup>1,2,7,8</sup>, Laurie J Hannigan<sup>2,9,10</sup>, Espen Moen Eilertsen<sup>6,11,12</sup>,  
7 Ziada Ayorech<sup>6</sup>, Fartein A Torvik<sup>6,12</sup>, George Davey Smith<sup>2,3</sup>, Deborah A Lawlor<sup>2,3</sup>, Eivind Ystrom<sup>6,10</sup>, Alexandra  
8 Havadahl<sup>2,6,9,10,§</sup>, David M Evans<sup>1,2,7,§</sup>

9 <sup>1</sup>The University of Queensland Diamantina Institute, The University of Queensland, Brisbane, Australia.

10 <sup>2</sup>MRC Integrative Epidemiology Unit at the University of Bristol, Bristol, UK.

11 <sup>3</sup>Population Health Sciences, Bristol Medical School, University of Bristol, Bristol, UK.

12 <sup>4</sup>Department of Epidemiology and Biostatistics, Imperial College London, London, UK.

13 <sup>5</sup>Social, Genetic and Developmental Psychiatry Centre, Institute of Psychiatry, Psychology and Neuroscience, King's  
14 College, London, UK.

15 <sup>6</sup>Department of Psychology, PROMENTA Research Center, University of Oslo, Oslo, Norway.

16 <sup>7</sup>Institute for Molecular Bioscience, University of Queensland, Brisbane, Australia.

17 <sup>8</sup>K.G. Jebsen Center for Genetic Epidemiology, Department of Public Health and Nursing, NTNU, Norwegian  
18 University of Science and Technology, Norway.

19 <sup>9</sup>Nic Waals Institute, Lovisenberg Diakonale Hospital, Oslo, Norway.

20 <sup>10</sup>Department of Mental Disorders, Norwegian Institute of Public Health, Oslo, Norway.

21 <sup>11</sup>Department of Psychology, University of Oslo, Forskningsveien 3A, 0373, Oslo, Norway.

22 <sup>12</sup>Centre for Fertility and Health, Norwegian Institute of Public Health, Oslo, Norway.

23 \*Corresponding author

24 §These authors contributed equally to this work

26 **Contents**

27 **Supplementary information S1: Sample selection flowchart**..... 3

28 **Supplementary information S2: Anthropometric data cleaning and growth curve fitting** ..... 3

29 **Supplementary information S3: Covariate data** ..... 5

30 **Supplementary information S4: Linear mixed model to account for non-independence between siblings** ..... 6

31 **Supplementary information S5: z-test for the difference in maternal and paternal associations** ..... 6

32 **Supplementary information S6: Summary statistics for transformed and untransformed exposure and outcome**

33 **variables**..... 7

34 **Supplementary information S7: Tests for non-linear associations between exposures and outcomes**..... 8

35 **Supplementary information S8: Multiple Children of Twins and Siblings (MCoTS) model** ..... 30

36 **Supplementary information S9: MCoTS model with ACE partition of parental exposure** ..... 32

37 **Supplementary information S10: MCoTS model with AE partition of parental exposure** ..... 33

38 **Supplementary information S11: Liability threshold model for untransformed CEBQ outcomes**..... 34

39 **Supplementary information S12: Differences in participant characteristics between baseline and 8 year old sample**

40 **..... 35**

41 **Supplementary information S13: Linear associations between parental BMI and offspring predicted BMI** ..... 36

42 **Supplementary information S14: Linear associations between offspring 8 year BMI and CEBQ outcomes** ..... 36

43 **Supplementary information S15: Statistical interaction between maternal and paternal BMI** ..... 37

44 **Supplementary information S16: MCoTS results for the association of parental BMI with offspring birth weight,**

45 **adjusted for potential confounders**..... 38

46 **Supplementary information S17: MCoTS results for the association of parental BMI with offspring birth weight**

47 **and BMI**..... 39

48 **Supplementary information S18: MCoTS results for the association of parental BMI with offspring predicted BMI**

49 **..... 40**

50 **Supplementary information S19: MCoTS results for the association of parental BMI with offspring weight, BMI**

51 **and ponderal index at birth** ..... 41

52 **Supplementary information S20: MCoTS results for the association of parental BMI with offspring eating**

53 **behaviour (CEBQ) traits**..... 42

54 **References** ..... 42

55

56

57 **Supplementary information S1: Sample selection flowchart**

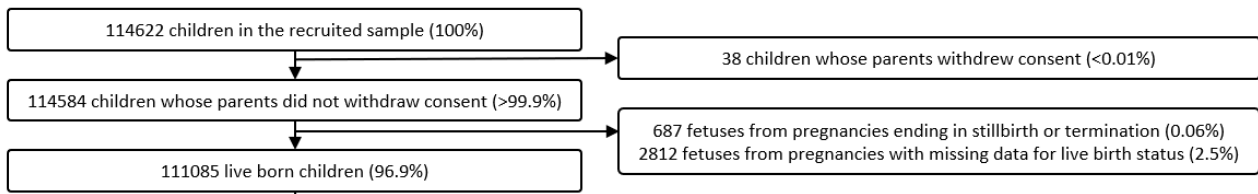

| Outcome                      | n children with available data for all necessary variables |                               |                               |
|------------------------------|------------------------------------------------------------|-------------------------------|-------------------------------|
|                              | Linear regression analyses                                 | MCoTS analyses (maternal BMI) | MCoTS analyses (paternal BMI) |
| Birth weight                 | 85866 (74.9%)                                              | 45752 (39.9%)                 | 50999 (44.5%)                 |
| 6 month BMI                  | 69256 (60.4%)                                              | 35913 (31.3%)                 | 39529 (34.5%)                 |
| 1 year BMI                   | 59292 (51.7%)                                              | 31100 (27.1%)                 | 34210 (29.8%)                 |
| 2 year BMI                   | 30904 (27.0%)                                              | 17001 (14.8%)                 | 18653 (16.3%)                 |
| 3 year BMI                   | 39101 (34.1%)                                              | 21512 (18.8%)                 | 23319 (20.3%)                 |
| 5 year BMI                   | 32848 (28.7%)                                              | 18194 (15.9%)                 | 19393 (16.9%)                 |
| 8 year BMI                   | 46620 (40.7%)                                              | 24954 (21.8%)                 | 27051 (23.6%)                 |
| Predicted BMI (all ages)     | 47524 (41.5%)                                              | 25347 (22.1%)                 | 27530 (24.0%)                 |
| CEBQ: food responsiveness    | 37265 (32.5%)                                              | 20074 (17.5%)                 | 21573 (18.8%)                 |
| CEBQ: fussiness              | 37284 (32.5%)                                              | 20089 (17.5%)                 | 21587 (18.8%)                 |
| CEBQ: satiety responsiveness | 37371 (32.6%)                                              | 20077 (17.5%)                 | 21576 (18.8%)                 |
| CEBQ: slow eating            | 37254 (32.5%)                                              | 20071 (17.5%)                 | 21570 (18.8%)                 |
| CEBQ: emotional undereating  | 36583 (31.9%)                                              | 19713 (17.2%)                 | 21175 (18.5%)                 |
| CEBQ: emotional overeating   | 36735 (32.0%)                                              | 19807 (17.3%)                 | 21269 (18.6%)                 |

58

59 **Supplementary information S2: Anthropometric data cleaning and growth curve fitting**

60 For all anthropometric variables, we set values that were biologically implausible to missing. Biological implausibility  
 61 was determined by manual examination of the distribution of weight, height, BMI and ponderal index at each age  
 62 and, where relevant, by comparison of values to those at earlier and later timepoints. Implausible weight and height  
 63 values were excluded prior to calculation of BMI and ponderal index.

64 We analysed the children’s mother-reported BMI at age 6 months and 1, 2, 3, 5, and 8 years. Analyses involving  
 65 mother-reported BMI measurements had different sample sizes for each age due to missing data (either for whole  
 66 questionnaires or for individual questions within questionnaires). Furthermore, analyses involving mother-reported  
 67 BMI measurements made inefficient use of the available data, because each mother-reported measurement was  
 68 considered in isolation without accounting for the child’s other measurements, and sometimes children had multiple  
 69 measurements available at similar ages, of which only one was used. In order to maximise statistical efficiency we  
 70 therefore used all available offspring BMI measurements to fit a growth curve, from which we predicted offspring  
 71 BMI at 1 year intervals between age 1 and 8 years. These fitted BMI values, which we refer to as “predicted BMI”,  
 72 were used as outcomes as a supplement to the mother-reported BMI measures described above, enabling  
 73 comparison of linear regression and MCoTS results from an identical (and larger) sample across different ages.

74 Children with at least one BMI measurement taken between 1 and 8 years of age were included in the sample used  
 75 to fit the growth curve. BMI across childhood has a complex shape; there is a steep increase from birth to around 9  
 76 months of age (which is referred to as the adiposity peak), then a decline until around 6 years of age (the adiposity  
 77 rebound) before increasing through puberty. Due to this complex shape, measurements taken before age one were  
 78 not used as several repeated measures in the first year of life are required to accurately model the adiposity peak

(1). In total, 323,372 measurements from 80,805 individual children (48.8% female) were used, and the mean number of measurements per child was 4.00. We did not natural log transform BMI measurements prior to fitting the growth curve because BMI was only slightly skewed from age five onwards. We fit a linear mixed model, separately in males and females with linear, quadratic and cubic terms for age in both the fixed and random effects to account for nonlinearity of BMI change over time, using the R package nlme (2, 3). The random effects allow the intercept and slope to vary around the population mean for each individual, and appropriately account for clustering of BMI measurements within individual children. Prior to model fitting, age was centered at four years (the mean age in the data). To ensure we had the best fitting model, we varied both the fixed and random effects and the correlation structure for the residuals then compared the models using the Akaike Information Criterion (AIC), Bayesian Information Criterion (BIC) and likelihood ratio tests. We established that (i) linear, quadratic and cubic fixed and random effects were required to adequately describe the growth curve, and (ii) a first order continuous autoregressive (AR1) correlation structure for the residuals gave better fit than a compound symmetry structure or unstructured residuals. Therefore, the final model for the BMI of the  $i^{th}$  individual at the  $t^{th}$  time point (age) was:

$$BMI_{it} = \beta_0 + u_{0i} + \beta_1 age_{it} + u_{1i} age_{it} + \beta_2 age_{it}^2 + u_{2i} age_{it}^2 + \beta_3 age_{it}^3 + u_{3i} age_{it}^3 + e_{it}$$

where  $\beta_0, \beta_1, \beta_2$  and  $\beta_3$  are the fixed coefficients representing the average intercept and linear, quadratic and cubic age effects respectively.  $u_{0i}, u_{1i}, u_{2i}$  and  $u_{3i}$  are the random coefficients representing the deviation for individual  $i$  from the average intercept and linear, quadratic and cubic age effects respectively, with  $u_i \sim N(\mathbf{0}, \mathbf{G})$  where  $\mathbf{G}$  is the variance-covariance matrix of the random effects.  $e_{it}$  is a normally distributed residual capturing the deviation of the  $i^{th}$  individual at the  $t^{th}$  time point from the individual growth curve,  $e_{it} \sim N(\mathbf{0}, \mathbf{\Sigma})$  where  $\mathbf{\Sigma}$  is the residual correlation matrix and a first order continuous autoregressive (AR1) correlation structure was assumed. The model accounts for missing data on the assumption that data are missing at random.

We used the growth curve to calculate predicted BMI (i.e. the fitted values from the linear mixed model) at one year age intervals between one and eight years, separately for male and female offspring, for children with at least three BMI measurements available. From age five onwards, predicted BMI variables were slightly skewed so were natural log transformed prior to subsequent analysis.

105 **Supplementary information S3: Covariate data**

106 MoBa mothers and fathers each completed a questionnaire at around 17 weeks of gestation (which are referred to  
 107 here as “Questionnaire 1”, and “Father Questionnaire”). MoBa questionnaire data were linked to the Medical Birth  
 108 Registry of Norway (MBRN) version 2017Q4 (4), which contained data from the birth notification forms (99.9% of  
 109 pregnancies), or notification forms related to termination of pregnancy (0.1% of pregnancies). The questionnaire-  
 110 and MBRN-derived variables used in the present study are detailed in the table below.

| Variable                           | Data source                             | Categories                                                                                                                                                                                                                                                                               | Notes                                                                                                                              |
|------------------------------------|-----------------------------------------|------------------------------------------------------------------------------------------------------------------------------------------------------------------------------------------------------------------------------------------------------------------------------------------|------------------------------------------------------------------------------------------------------------------------------------|
| Maternal parity                    | MBRN                                    | “zero”, “one”, “two”, “three”, “four or more”                                                                                                                                                                                                                                            | The highest value of the separate variables “parity registered by MBRN” and “parity reported by the mother” was used               |
| Maternal smoking during pregnancy  | Questionnaire 1                         | “yes, “no”                                                                                                                                                                                                                                                                               |                                                                                                                                    |
| Paternal smoking during pregnancy  | Paternal questionnaire, Questionnaire 1 | “yes, “no”                                                                                                                                                                                                                                                                               | Maternal report was substituted for missing paternal report data for 23.9% of fathers                                              |
| Maternal educational attainment    | Questionnaire 1                         | “Incomplete 9-year secondary school”, “9-year secondary school”, “1-2 year high school”, “vocational high school”, “3-year high school general studies/junior college”, regional technical college/4-year university degree”, “university/technical college, more than 4 years”, “other” |                                                                                                                                    |
| Paternal educational attainment    | Paternal questionnaire, Questionnaire 1 | “Incomplete 9-year secondary school”, “9-year secondary school”, “1-2 year high school”, “vocational high school”, “3-year high school general studies/junior college”, regional technical college/4-year university degree”, “university/technical college, more than 4 years”, “other” | Maternal report was substituted for missing paternal report data for 23.6% of fathers                                              |
| Parental language                  | Questionnaire 1                         | “Norwegian”, “other”                                                                                                                                                                                                                                                                     |                                                                                                                                    |
| Grandparental language             | Questionnaire 1                         | “Norwegian”, “other”                                                                                                                                                                                                                                                                     |                                                                                                                                    |
| Maternal income                    | Questionnaire 1                         | “no income”, <150,000 NOK”, “150,000-199,999 NOK”, “200,000-299,999 NOK”, “300,000-399,999 NOK”, “400,000-499,999 NOK”, >500,000 NOK ”                                                                                                                                                   |                                                                                                                                    |
| Paternal income                    | Paternal questionnaire, Questionnaire 1 | “no income”, <150,000 NOK”, “150,000-199,999 NOK”, “200,000-299,999 NOK”, “300,000-399,999 NOK”, “400,000-499,999 NOK”, >500,000 NOK ”                                                                                                                                                   | Maternal report was substituted for missing paternal report data for 64.3% of fathers                                              |
| Maternal age at childbirth         | MBRN                                    | “≤17 years”, 18-19 years”, “20-24 years”, “20-25 years”, “25-29 years”, “30-34 years”, “35-39 years”, “40-44 years”, 45+ years”                                                                                                                                                          |                                                                                                                                    |
| Paternal age at childbirth         | MBRN                                    | “≤19 years”, 20-24 years”, “25-29 years”, “30-34 years”, “35-39 years”, “40-44 years”, “45-49 years”, 50+ years”                                                                                                                                                                         |                                                                                                                                    |
| Offspring gestational age at birth | MBRN                                    | NA                                                                                                                                                                                                                                                                                       | Based on ultrasound estimation. If ultrasound was not available, the gestational age was calculated from the last menstrual period |
| Liveborn status                    | MBRN                                    | “liveborn”, “stillborn/termination”                                                                                                                                                                                                                                                      |                                                                                                                                    |
| Offspring sex                      | MBRN                                    | “female”, “male”                                                                                                                                                                                                                                                                         |                                                                                                                                    |

111 **NOK:** Norwegian Krone

112 **Supplementary information S4: Linear mixed model to account for non-independence between siblings**

113 In MoBa there are a large number of siblings in the offspring generation (if siblings were excluded, the sample would  
114 be around 17% smaller). In order to maximise power we included siblings in the sample used for linear regression  
115 analyses, and used a linear mixed model with a random intercept at the family level to appropriately account for  
116 non-independence between siblings:

117 
$$Y_{ij} = \beta_0 + u_{0j} + \beta_1 \times \text{maternal BMI}_{ij} + \beta_2 \times \text{paternal BMI}_{ij} + \sum_l \beta_l \times \text{covariate}_{lij} + e_{ij} \quad (1)$$

118 where  $Y_{ij}$  is the phenotype for the  $i^{\text{th}}$  individual in the  $j^{\text{th}}$  family,  $\beta_0, \beta_1, \beta_2$  and  $\beta_l$  are the fixed coefficients for the  
119 intercept, maternal BMI, paternal BMI and the  $l^{\text{th}}$  covariate respectively,  $u_{0j}$  is a random intercept for the  
120  $j^{\text{th}}$  family,  $u_j \sim N(0, \sigma_u^2)$ , and  $e_{ij}$  is a residual,  $e_{ij} \sim N(\mathbf{0}, \mathbf{\Sigma})$ .  $\mathbf{\Sigma} = \mathbf{I}\sigma_e^2$  is the residual variance-covariance matrix, where  
121  $\mathbf{I}$  is an identity matrix and  $\sigma_e^2$  is the residual variance. Linear mixed models were fitted using the R package nlme (1,  
122 2).

123 **Supplementary information S5: z-test for the difference in maternal and paternal associations**

124 For each offspring outcome we used a z-test to test whether associations with maternal and paternal BMI differed in  
125 magnitude. We calculated the z statistic as  $z = \delta / \sqrt{\text{Var}(\beta_1) + \text{Var}(\beta_2) - 2\text{Cov}(\beta_1, \beta_2)}$ , where  $\delta$  is the difference  
126 between the coefficients for maternal BMI and paternal BMI ( $\beta_1$  and  $\beta_2$  respectively in equation 1), and  
127  $\text{Cov}(\beta_1, \beta_2)$  is from the estimated covariance matrix for the fixed effects in equation 1.

128  
129

**Supplementary information S6: Summary statistics for transformed and untransformed exposure and outcome variables**

| Variable                                                                 | Mean  | SD   | Minimum | Maximum | Skew  | Kurtosis |
|--------------------------------------------------------------------------|-------|------|---------|---------|-------|----------|
| Maternal BMI (z-score)                                                   | 0.00  | 1.00 | -2.68   | 7.84    | 1.42  | 3.02     |
| Log maternal BMI (z-score) <sup>a</sup>                                  | 0.00  | 1.00 | -3.86   | 5.38    | 0.81  | 0.85     |
| Paternal BMI (z-score)                                                   | 0.00  | 1.00 | -3.82   | 10.14   | 1.02  | 3.10     |
| Log paternal BMI (z-score) <sup>a</sup>                                  | 0.00  | 1.00 | -5.38   | 6.79    | 0.44  | 0.97     |
| Birth weight (sex standardised z-score) <sup>a</sup>                     | 0.01  | 0.98 | -5.30   | 4.61    | -0.74 | 2.34     |
| Birth BMI (sex standardised z-score) <sup>a</sup>                        | 0.01  | 0.98 | -5.96   | 5.24    | -0.50 | 1.96     |
| Birth PI (sex standardised z-score) <sup>a</sup>                         | 0.01  | 0.99 | -4.85   | 11.91   | 0.32  | 2.81     |
| 6 month weight (age/sex standardised z-score) <sup>a</sup>               | 0.00  | 1.00 | -5.57   | 6.21    | 0.26  | 0.70     |
| 6 month BMI (age/sex standardised z-score) <sup>a</sup>                  | 0.00  | 1.00 | -4.28   | 6.25    | 0.45  | 0.58     |
| 1 year weight (age/sex standardised z-score) <sup>a</sup>                | 0.00  | 1.00 | -5.56   | 5.84    | 0.35  | 0.52     |
| 1 year BMI (age/sex standardised z-score) <sup>a</sup>                   | 0.00  | 1.00 | -5.54   | 5.54    | 0.35  | 0.47     |
| 2 year weight (age/sex standardised z-score) <sup>a</sup>                | 0.00  | 1.00 | -4.19   | 5.64    | 0.30  | 0.51     |
| 2 year BMI (age/sex standardised z-score) <sup>a</sup>                   | 0.00  | 1.00 | -4.29   | 5.52    | 0.31  | 0.70     |
| 3 year weight (age/sex standardised z-score) <sup>a</sup>                | 0.00  | 1.00 | -3.79   | 8.59    | 0.48  | 0.99     |
| 3 year BMI (age/sex standardised z-score) <sup>a</sup>                   | 0.00  | 1.00 | -4.38   | 5.94    | 0.45  | 1.29     |
| 5 year weight (age/sex standardised z-score)                             | 0.00  | 1.00 | -3.78   | 6.77    | 0.74  | 1.76     |
| Log 5 year weight (age/sex standardised z-score) <sup>a</sup>            | 0.00  | 1.00 | -5.42   | 4.93    | 0.17  | 0.74     |
| 5 year BMI (age/sex standardised z-score)                                | 0.00  | 1.00 | -4.08   | 6.52    | 0.69  | 2.12     |
| Log 5 year BMI (age/sex standardised z-score) <sup>a</sup>               | 0.00  | 1.00 | -5.33   | 5.13    | 0.17  | 1.33     |
| 8 year weight (age/sex standardised z-score)                             | 0.00  | 1.00 | -3.24   | 8.82    | 1.02  | 2.21     |
| Log 8 year weight (age/sex standardised z-score) <sup>a</sup>            | 0.00  | 1.00 | -4.97   | 5.78    | 0.38  | 0.57     |
| 8 year BMI (age/sex standardised z-score)                                | 0.00  | 1.00 | -3.53   | 7.31    | 0.97  | 2.29     |
| Log 8 year BMI (age/sex standardised z-score) <sup>a</sup>               | 0.00  | 1.00 | -4.67   | 5.50    | 0.43  | 1.00     |
| 1 year predicted BMI (sex standardised z-score) <sup>a</sup>             | -0.01 | 1.04 | -5.03   | 5.73    | 0.34  | 0.52     |
| 2 year predicted BMI (sex standardised z-score) <sup>a</sup>             | 0.00  | 1.04 | -4.17   | 5.62    | 0.32  | 0.46     |
| 3 year predicted BMI (sex standardised z-score) <sup>a</sup>             | 0.00  | 1.04 | -4.27   | 6.23    | 0.36  | 0.58     |
| 4 year predicted BMI (sex standardised z-score) <sup>a</sup>             | 0.00  | 1.04 | -4.12   | 6.84    | 0.45  | 0.82     |
| 5 year predicted BMI (sex standardised z-score)                          | 0.00  | 1.05 | -4.26   | 7.01    | 0.62  | 1.35     |
| Log 5 year predicted BMI (sex standardised z-score) <sup>a</sup>         | -0.01 | 1.05 | -5.23   | 5.80    | 0.31  | 0.73     |
| 6 year predicted BMI (sex standardised z-score)                          | 0.00  | 1.05 | -4.12   | 6.93    | 0.81  | 1.97     |
| Log 6 year predicted BMI (sex standardised z-score) <sup>a</sup>         | -0.01 | 1.05 | -5.02   | 5.70    | 0.43  | 1.04     |
| 7 year predicted BMI (sex standardised z-score)                          | 0.00  | 1.06 | -3.99   | 7.63    | 0.94  | 2.38     |
| Log 7 year predicted BMI (sex standardised z-score) <sup>a</sup>         | -0.01 | 1.06 | -4.92   | 6.10    | 0.51  | 1.21     |
| 8 year predicted BMI (sex standardised z-score)                          | 0.00  | 1.07 | -3.91   | 7.70    | 0.98  | 2.60     |
| Log 8 year predicted BMI (sex standardised z-score) <sup>a</sup>         | -0.01 | 1.07 | -4.90   | 6.07    | 0.51  | 1.26     |
| CEBQ satiety responsiveness (age/sex standardised z-score)               | 0.00  | 1.00 | -3.42   | 3.27    | 0.06  | -0.06    |
| CEBQ satiety responsiveness (inverse normalised z-score) <sup>a, b</sup> | 0.00  | 1.00 | -3.91   | 4.08    | 0.00  | 0.00     |
| CEBQ slow eating (age/sex standardised z-score)                          | 0.00  | 1.00 | -2.02   | 4.11    | 0.57  | 0.14     |
| CEBQ slow eating (inverse normalised z-score) <sup>a, b</sup>            | 0.00  | 1.00 | -4.08   | 4.08    | 0.01  | -0.02    |
| CEBQ food responsiveness (age/sex standardised z-score)                  | 0.00  | 1.00 | -1.23   | 5.84    | 1.88  | 4.01     |
| CEBQ food responsiveness (inverse normalised z-score) <sup>a, b</sup>    | 0.00  | 0.99 | -3.81   | 4.07    | 0.02  | 0.01     |
| CEBQ fussiness (age/sex standardised z-score)                            | 0.00  | 1.00 | -2.17   | 2.80    | 0.16  | -0.44    |
| CEBQ fussiness (inverse normalised z-score) <sup>a, b</sup>              | 0.00  | 1.00 | -3.91   | 4.07    | 0.01  | -0.04    |
| CEBQ emotional overeating (age/sex standardised z-score)                 | 0.00  | 1.00 | -1.73   | 7.70    | 1.36  | 1.63     |
| CEBQ emotional overeating (inverse normalised z-score) <sup>a, b</sup>   | 0.00  | 0.99 | -3.74   | 4.06    | 0.01  | 0.02     |
| CEBQ emotional undereating (age/sex standardised z-score)                | 0.00  | 1.00 | -1.97   | 3.25    | 0.36  | -0.44    |
| CEBQ emotional undereating (inverse normalised z-score) <sup>a, b</sup>  | 0.00  | 1.00 | -3.91   | 4.06    | 0.02  | -0.04    |

130 **a:** variable was used in genetically informed structural equation modelling (MCoTS) analyses (variables used in linear regression  
131 analyses were identical, with the exception that unlogged parental BMI was used as the exposure, and for models involving  
132 weight/BMI/PI, age and sex were included as covariates rather than using age/sex standardized z-scores), **b:** CEBQ variables  
133 were regressed on age and sex prior to inverse normalization of the residuals within sex strata

134

135 **Supplementary information S7: Tests for non-linear associations between exposures and outcomes**

136 Our MCoTS structural equation models partitioned the covariance, which is a measure of linear association, between  
137 the natural logarithm of the exposure, and the outcome (which was logged when necessary). To assess whether a  
138 linear association adequately described the relationship between each logged exposure and outcome we (i) explored  
139 whether there was evidence for a quadratic association, (ii) fitted a LOWESS smoother, and (iii) regressed the  
140 outcome on categories of log parental BMI equivalent to the World Health Organization obesity classification (<18.5  
141 kg/m<sup>2</sup>, 18.5–24.9 kg/m<sup>2</sup>, 25–29.9 kg/m<sup>2</sup>, 30–34.9 kg/m<sup>2</sup>, 35–39.9 kg/m<sup>2</sup>, ≥40 kg/m<sup>2</sup>). Results are shown in the plots  
142 below, with vertical grey lines indicating the log BMI categories used for the categorical fit. Variables were treated as  
143 per the MCoTS analyses, i.e. exposures were logged and outcomes were logged when necessary. **INT:** inverse normal  
144 transformation.

145 Although there was some evidence for a non-linear association between log maternal BMI and offspring outcomes at  
146 younger ages (birth to three years), such that the association plateaued at higher maternal BMI, these departures  
147 from linearity were relatively mild, as demonstrated by the LOWESS and categorical fits. For log offspring BMI from  
148 age five onwards the associations with log maternal BMI were approximately linear. For log paternal BMI there was  
149 also evidence for a slight plateauing of the association with birth weight at higher paternal BMI, but associations  
150 with offspring BMI at ages beyond birth were approximately linear.

151

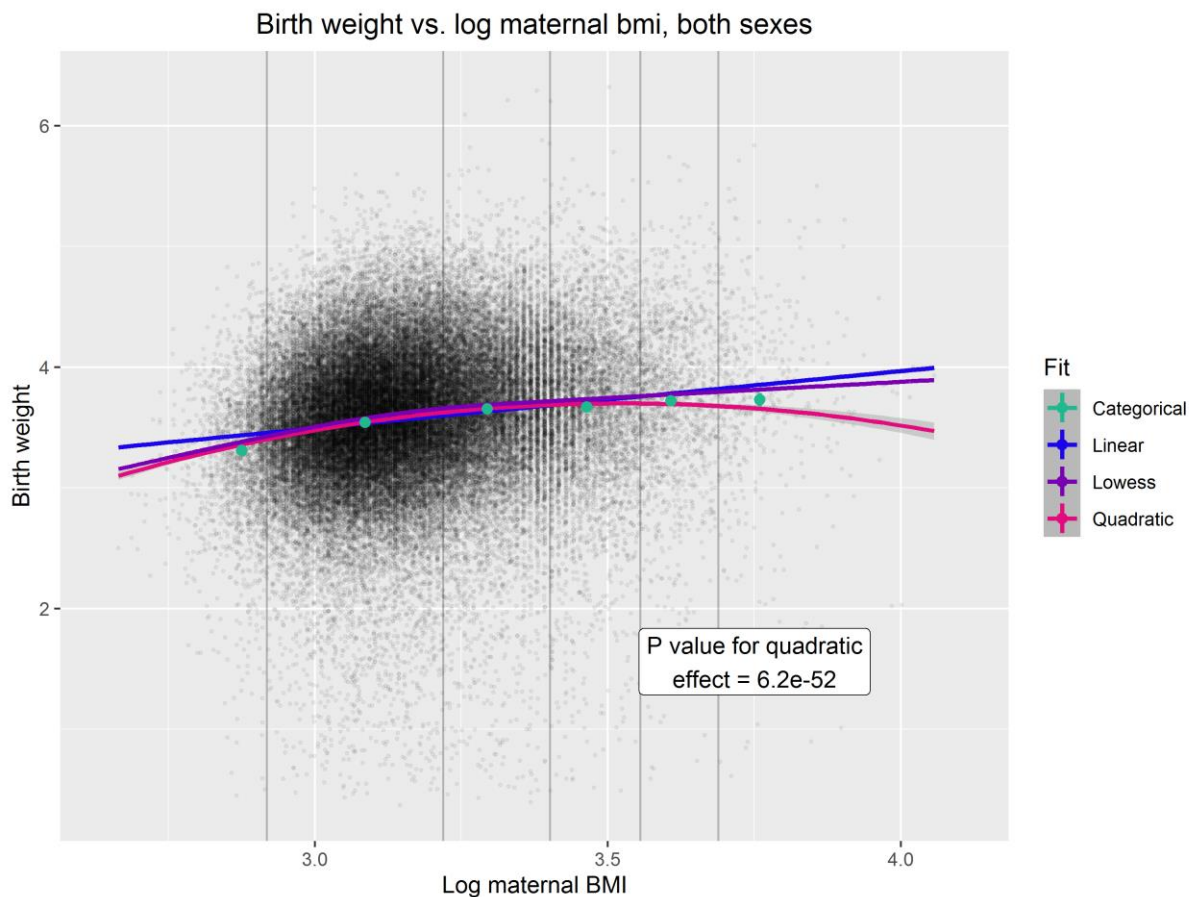

152



6mo BMI vs. log maternal bmi, both sexes

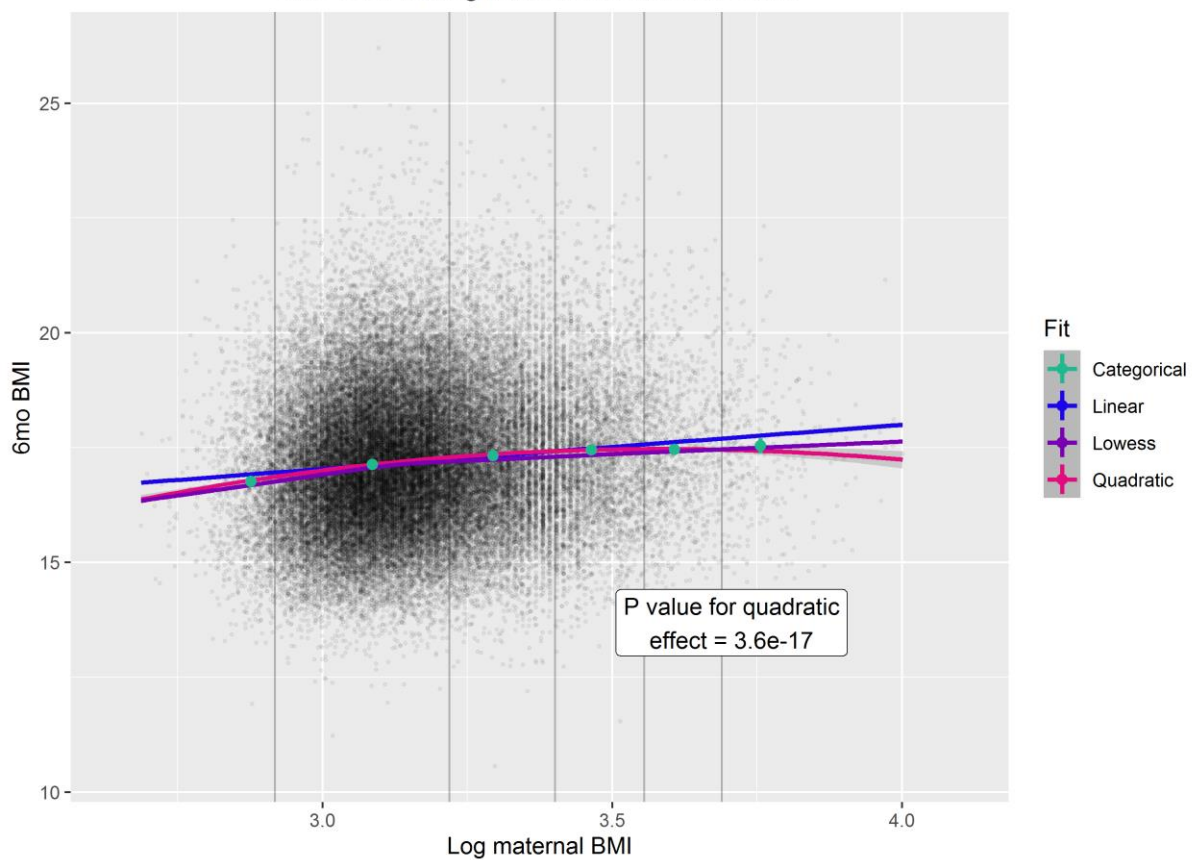

153

1yr BMI vs. log maternal bmi, both sexes

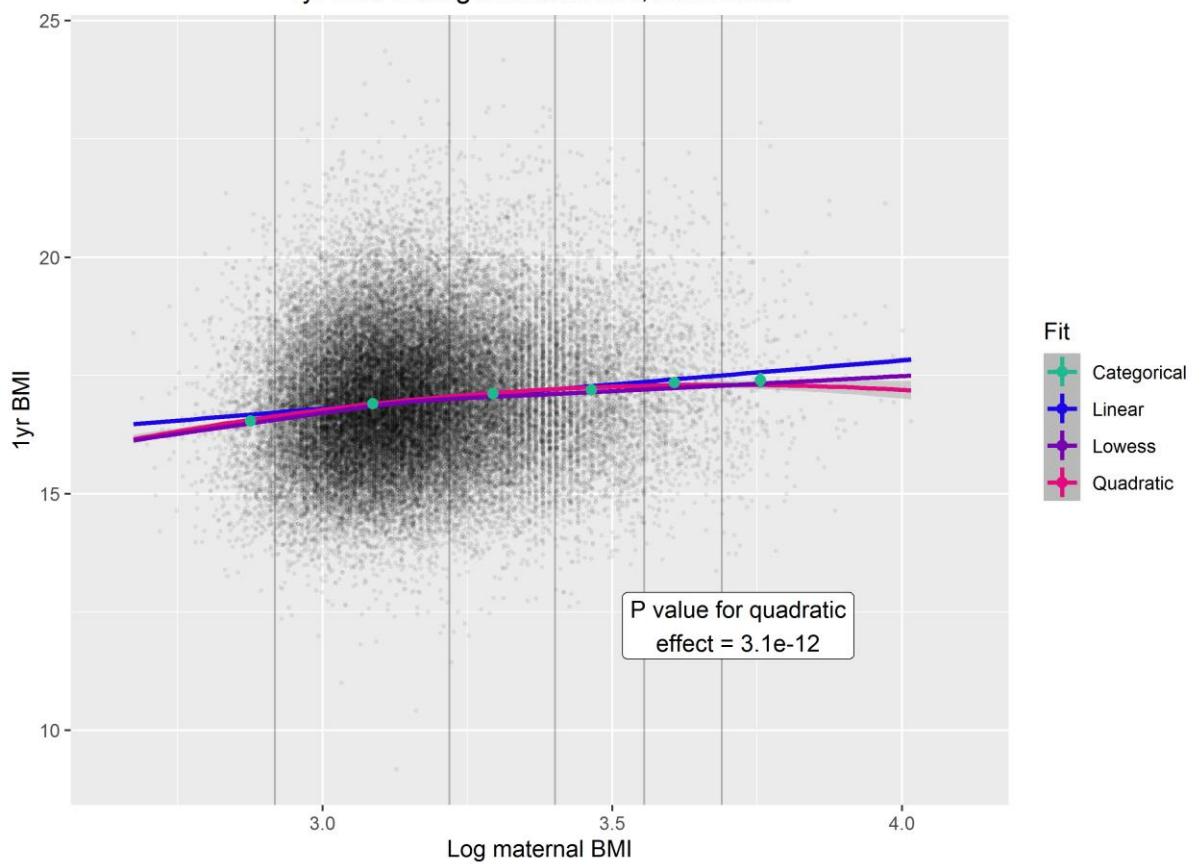

154

3yr BMI vs. log maternal bmi, both sexes

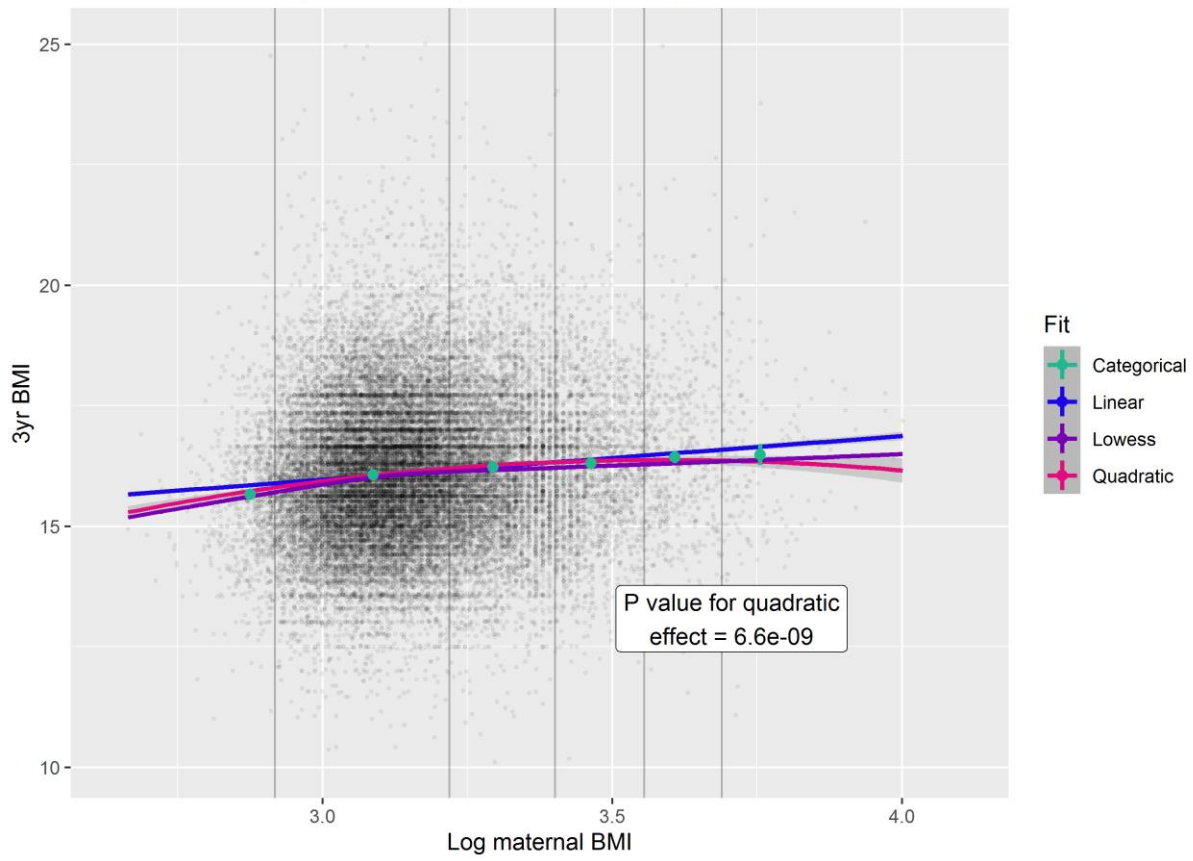

155

2yr BMI vs. log maternal bmi, both sexes

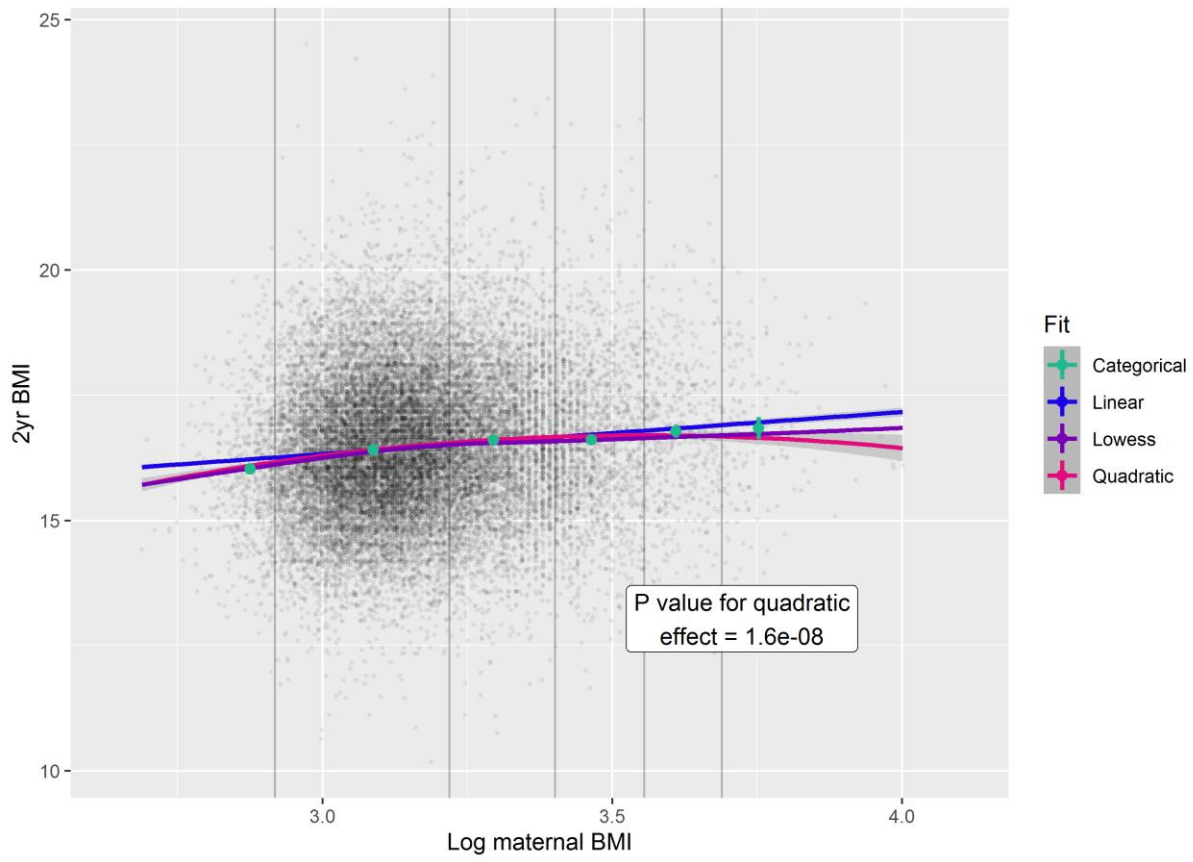

156

157

Log 5yr BMI vs. log maternal bmi, both sexes

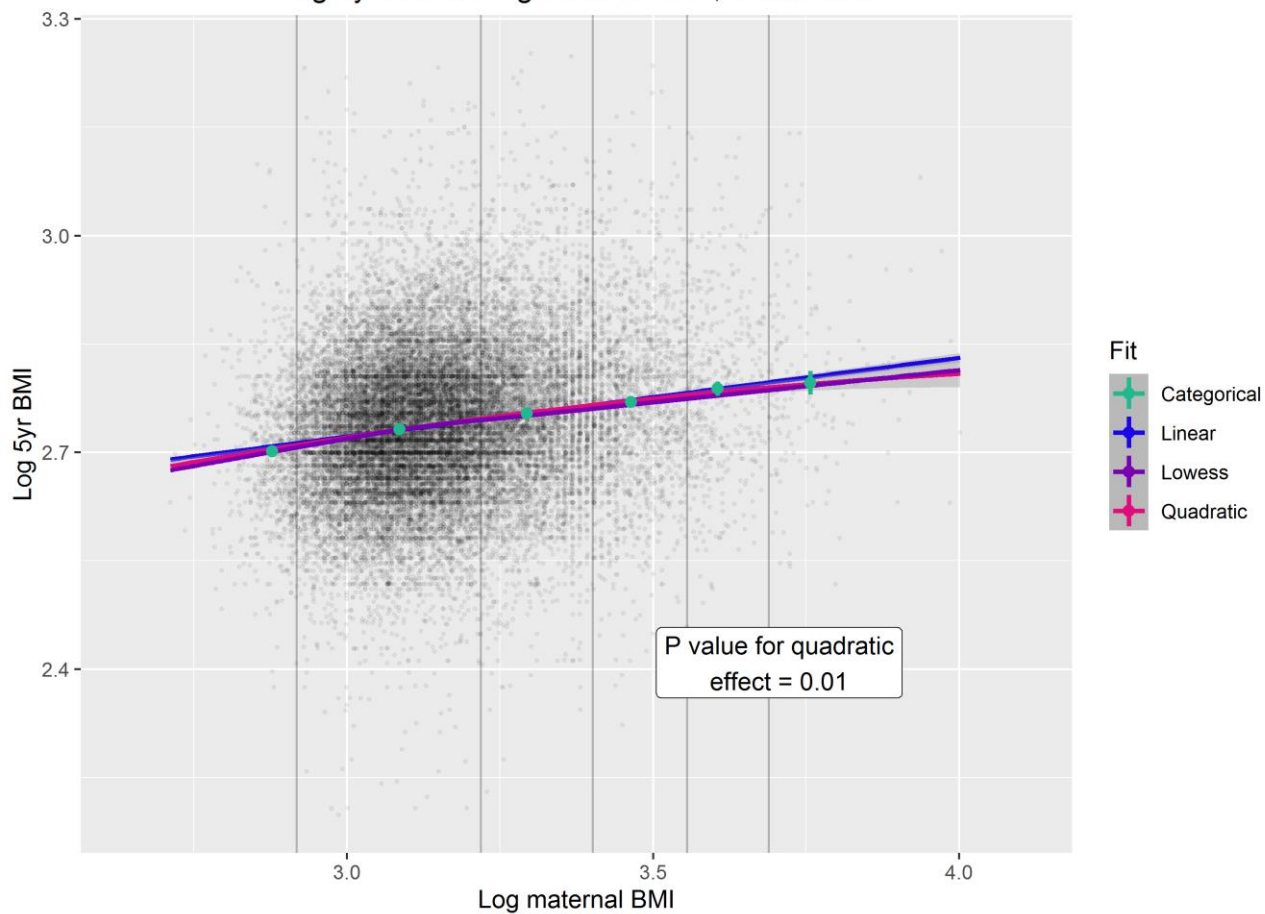

158

Log 8yr BMI vs. log maternal bmi, both sexes

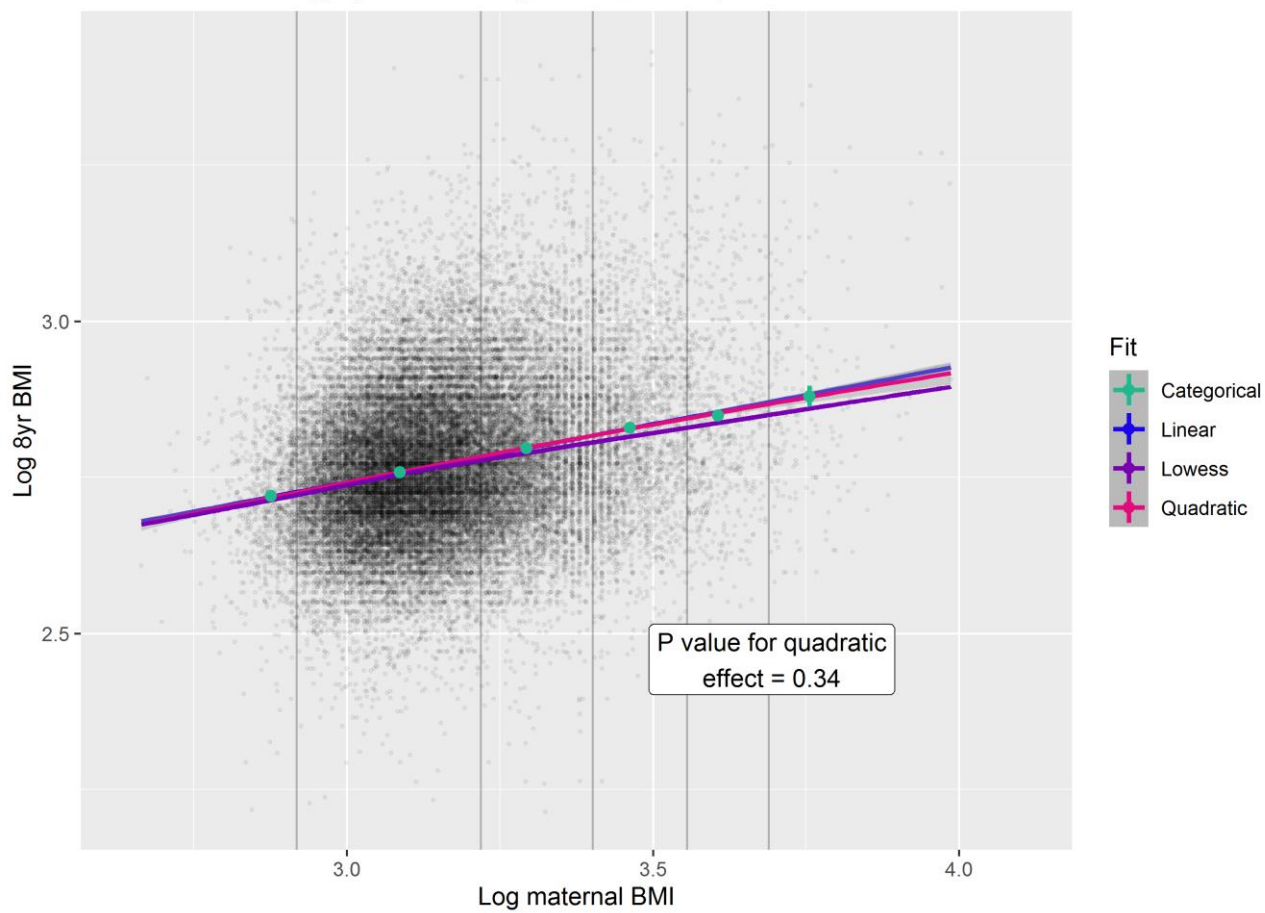

159

1yr predicted BMI vs. log maternal bmi, both sexes

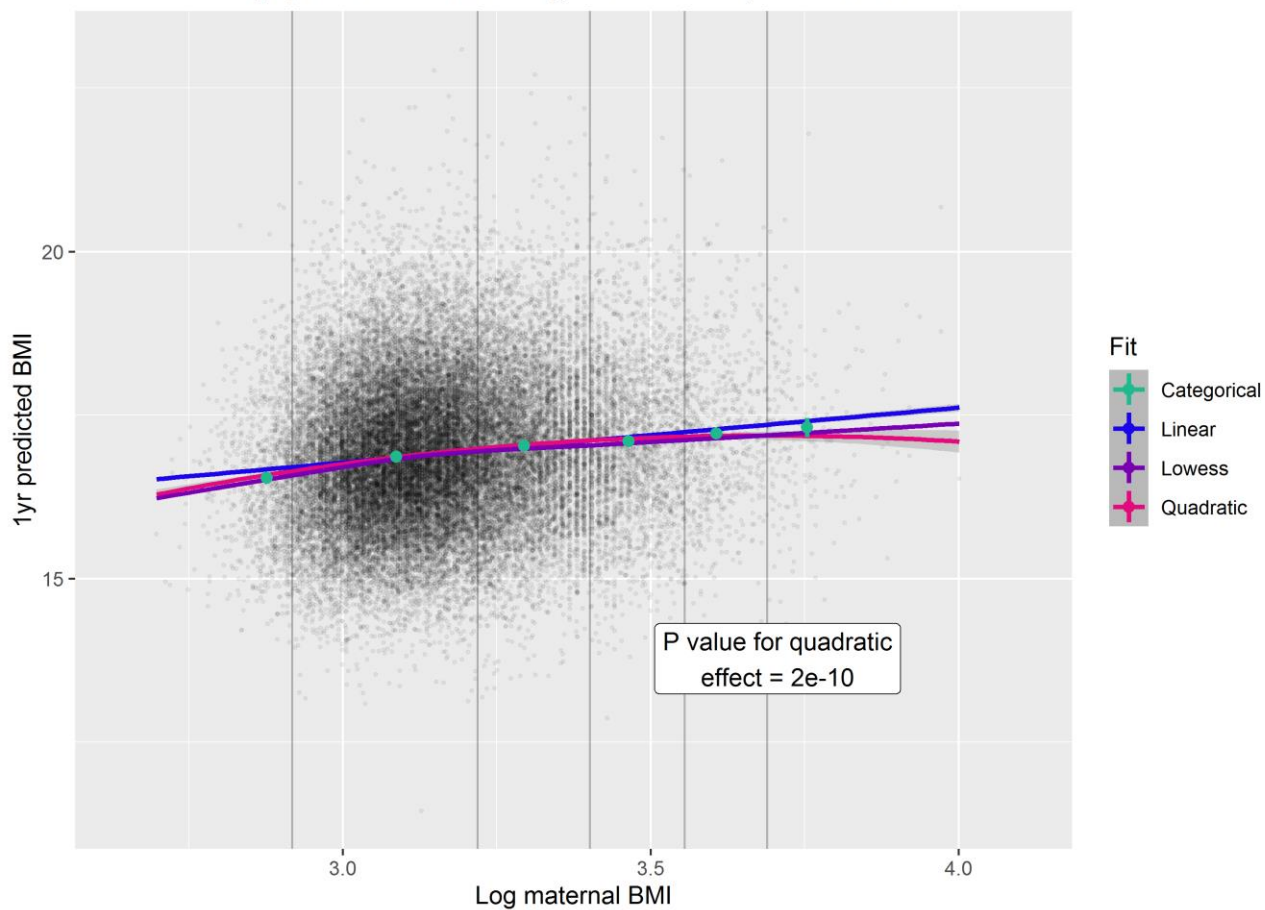

160

2yr predicted BMI vs. log maternal bmi, both sexes

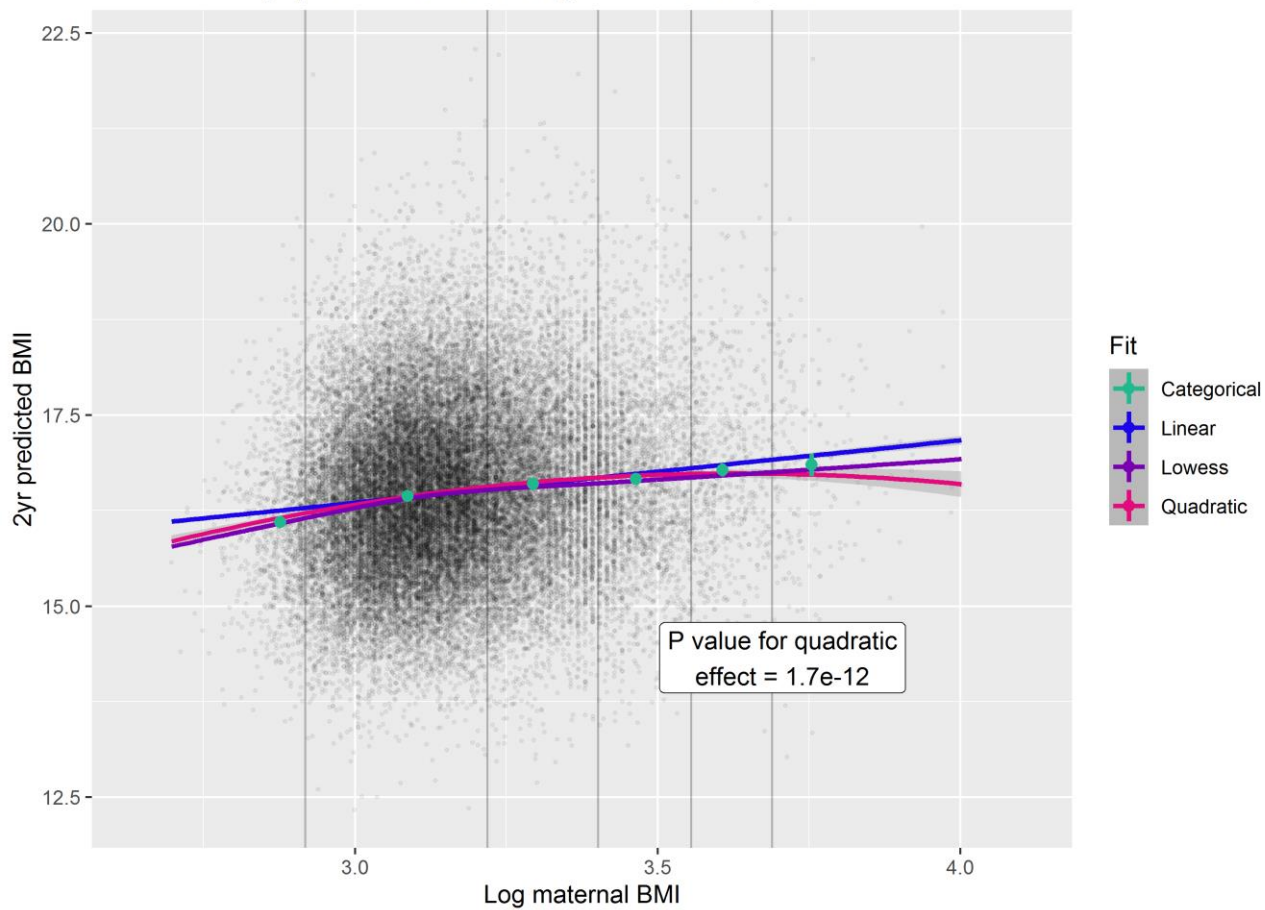

161

3yr predicted BMI vs. log maternal bmi, both sexes

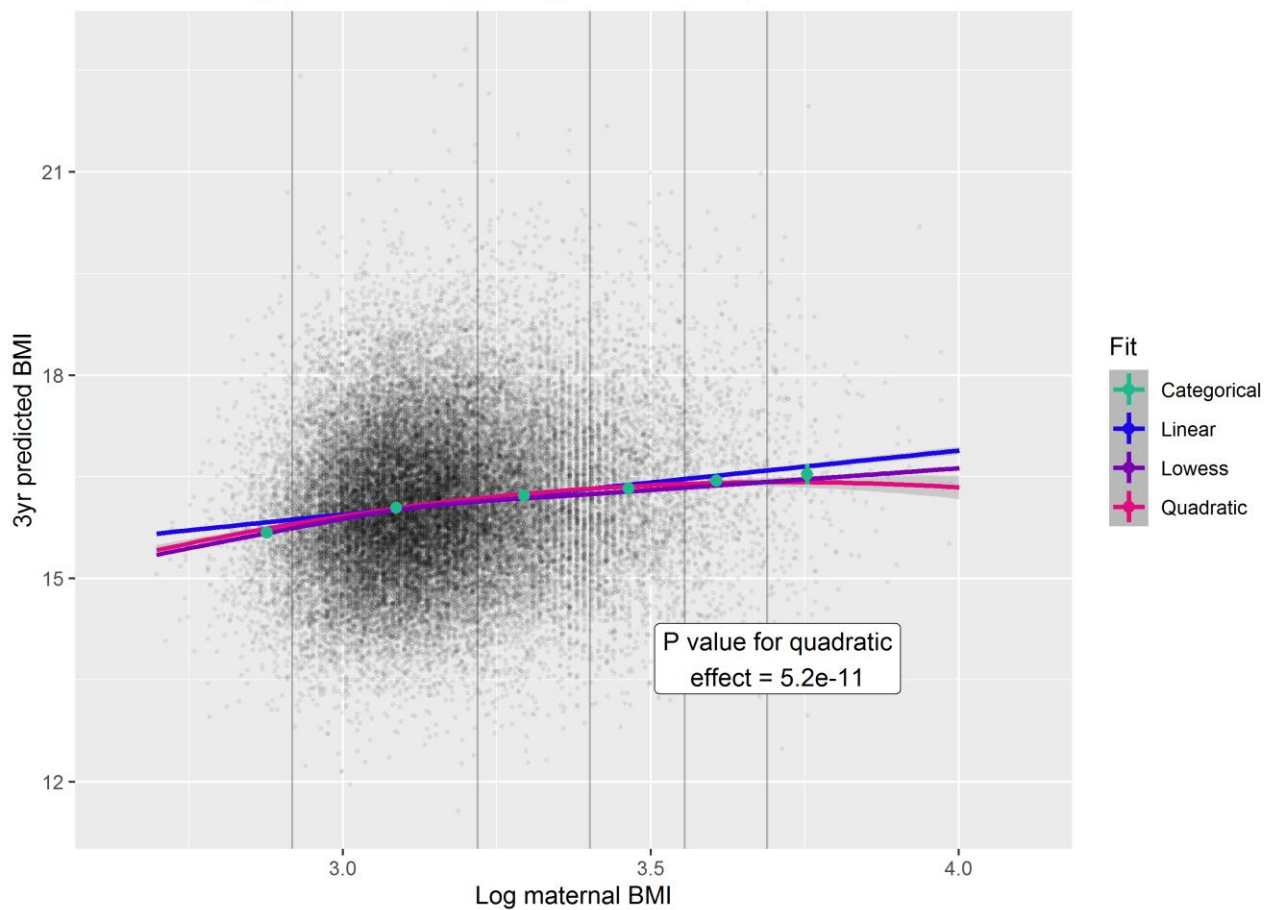

162

4yr predicted BMI vs. log maternal bmi, both sexes

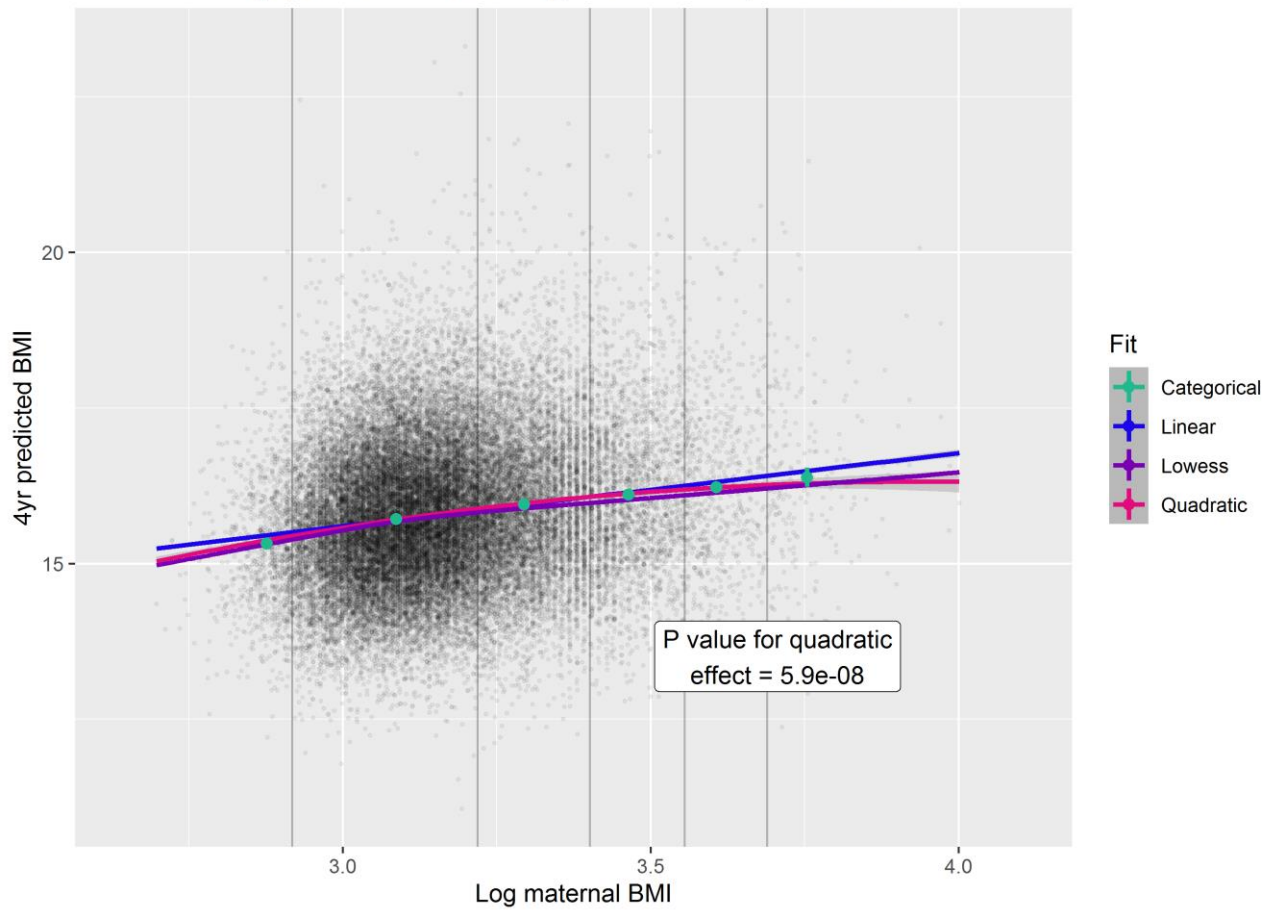

163

Log 5yr predicted BMI vs. log maternal bmi, both sexes

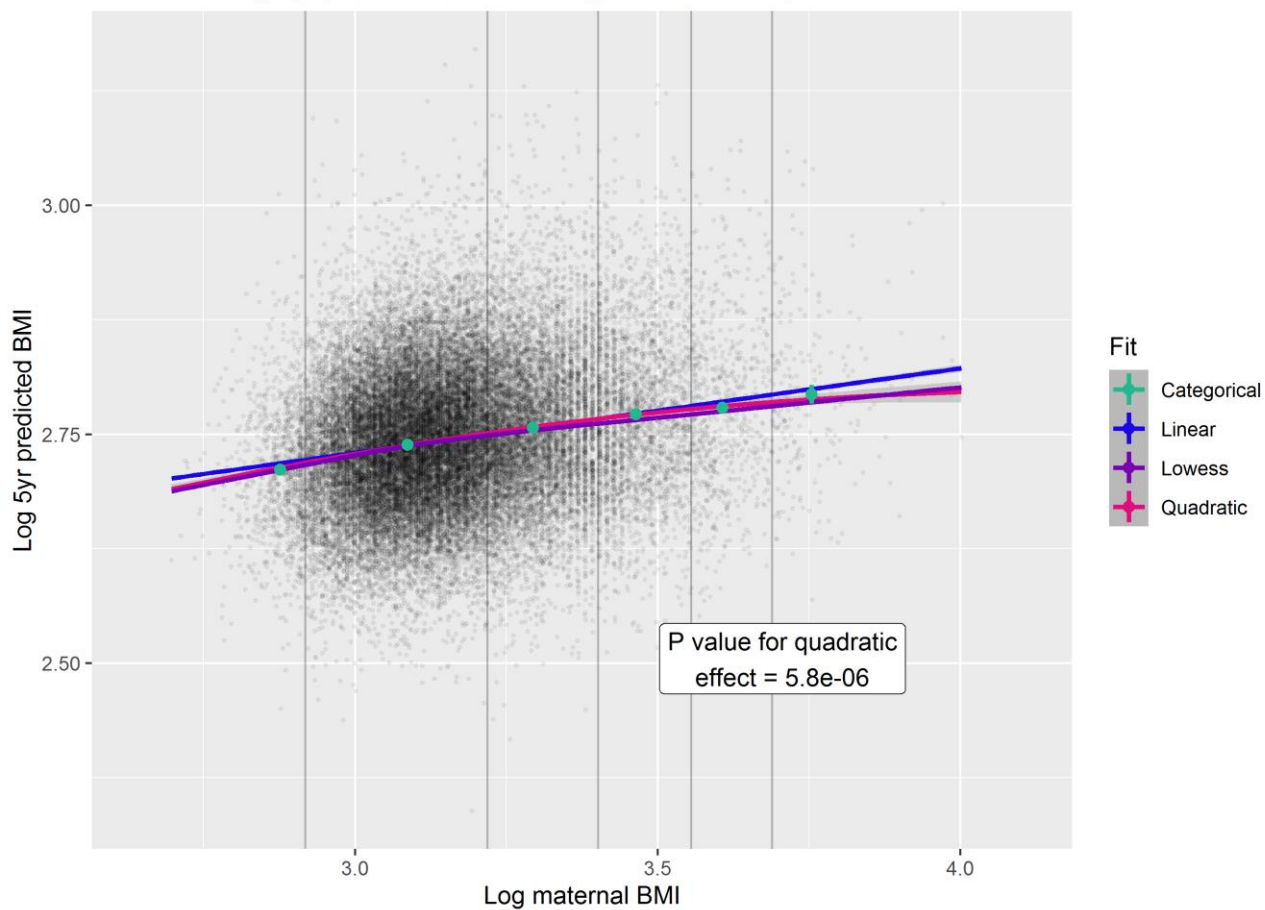

164

Log 6yr predicted BMI vs. log maternal bmi, both sexes

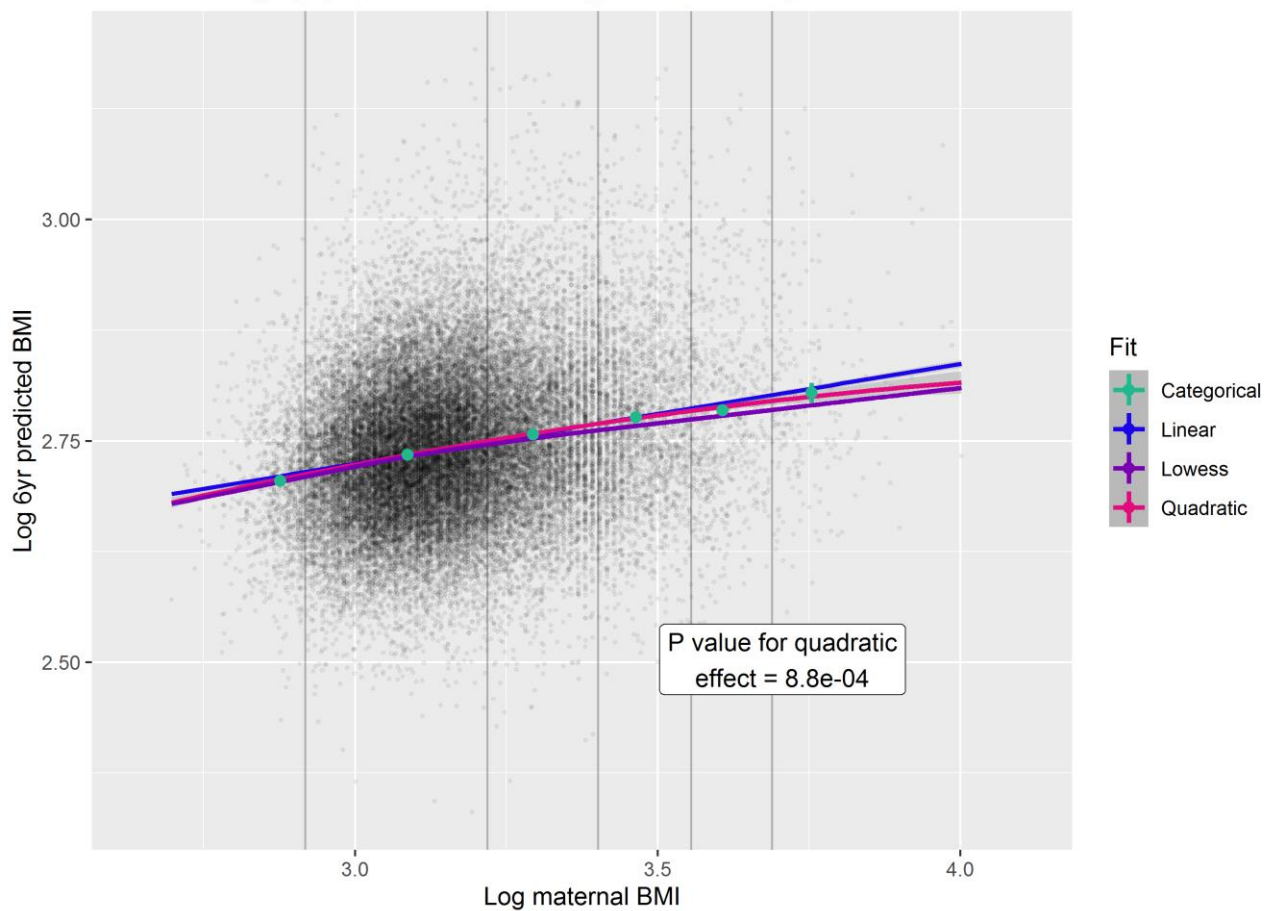

165

Log 7yr predicted BMI vs. log maternal bmi, both sexes

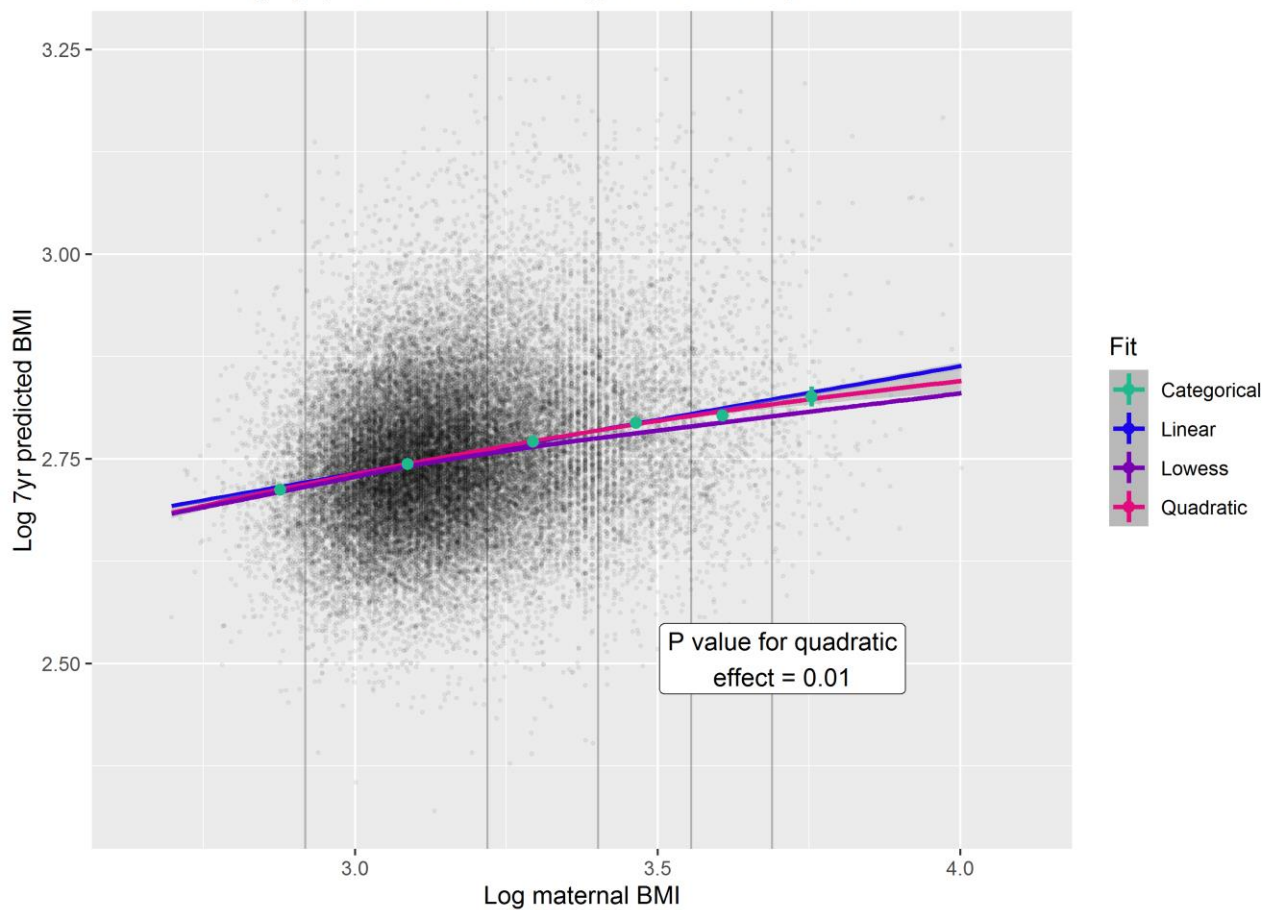

166

Log 8yr predicted BMI vs. log maternal bmi, both sexes

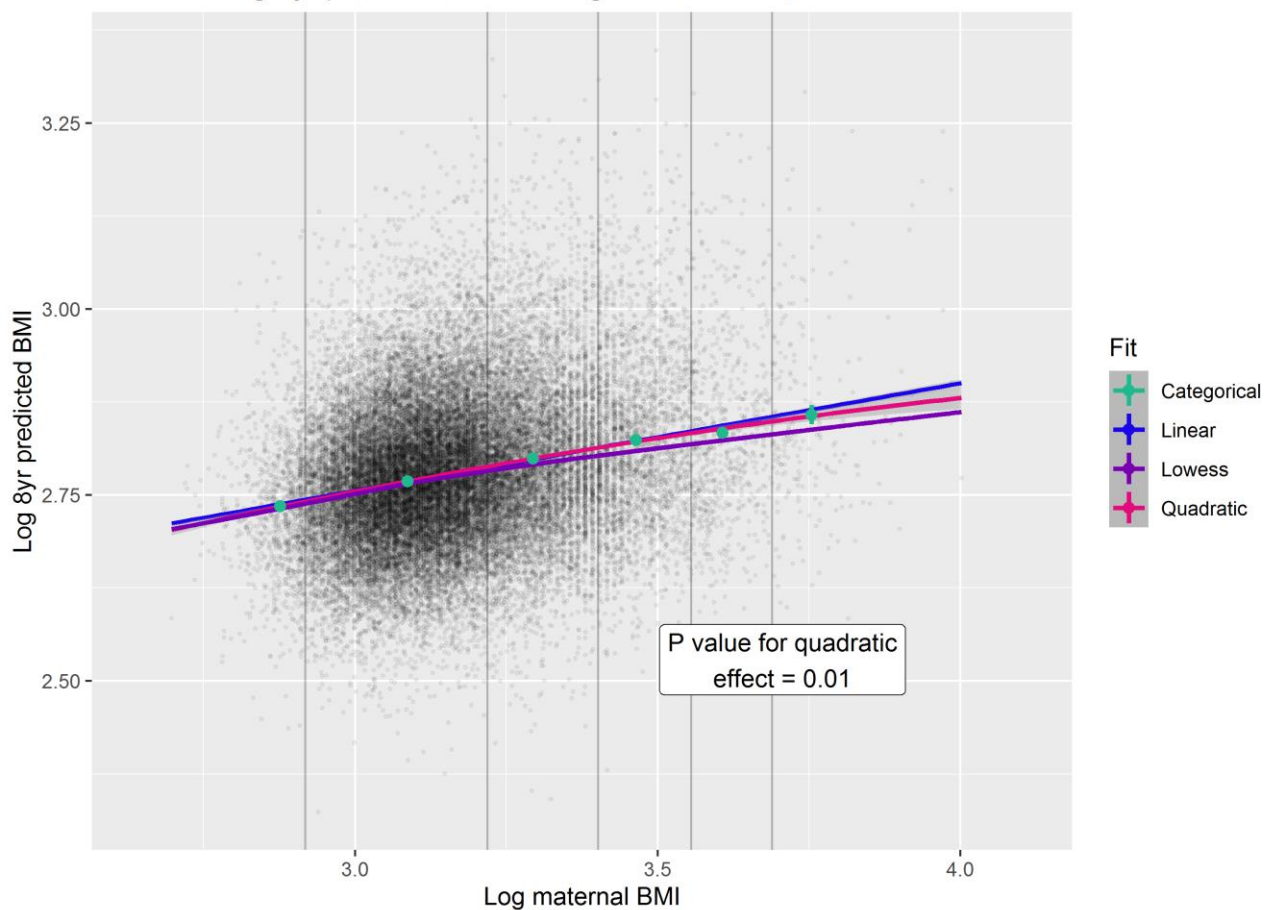

167

CEBQ satiety responsiveness (INT) vs. log maternal bmi, both sexes

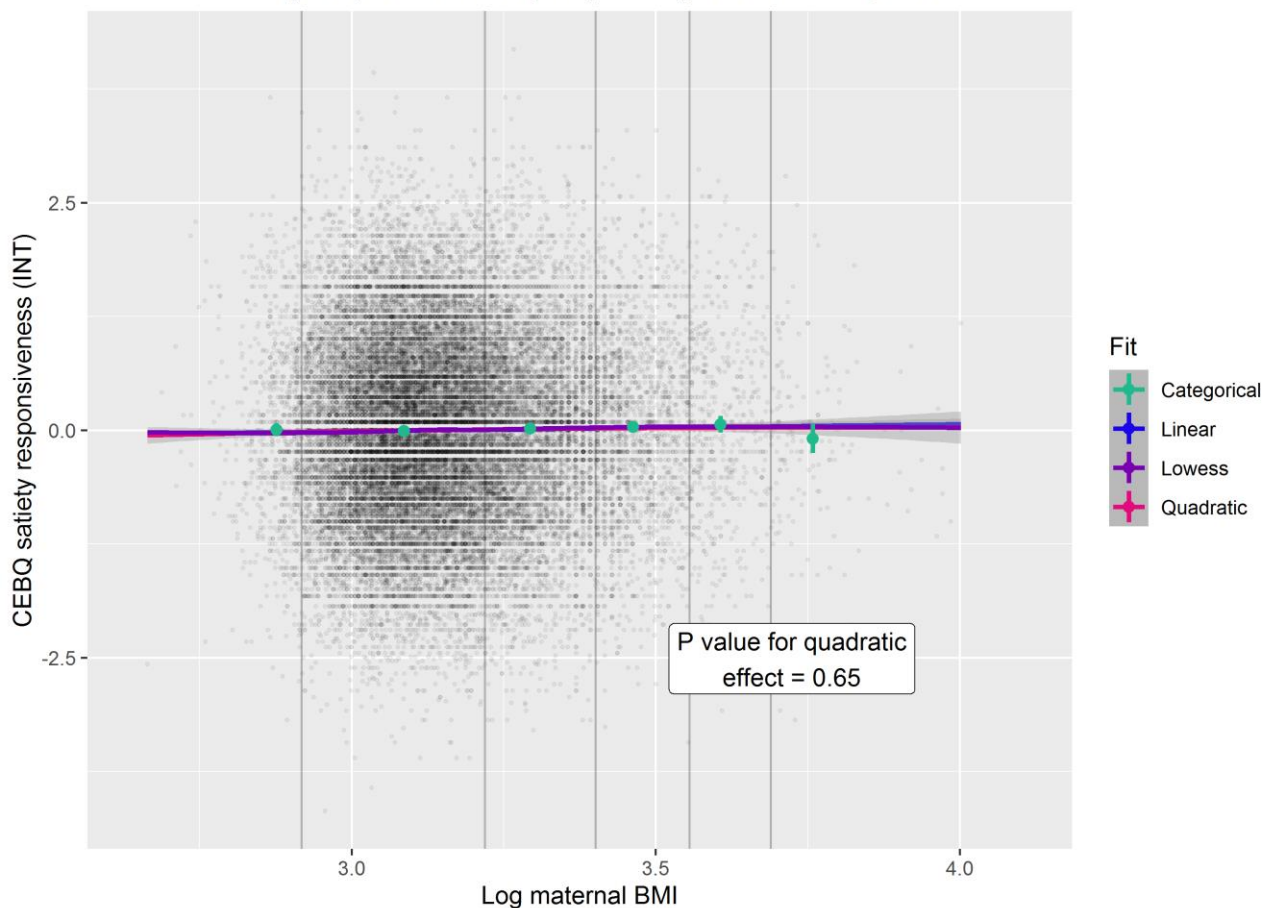

168

CEBQ slow eating (INT) vs. log maternal bmi, both sexes

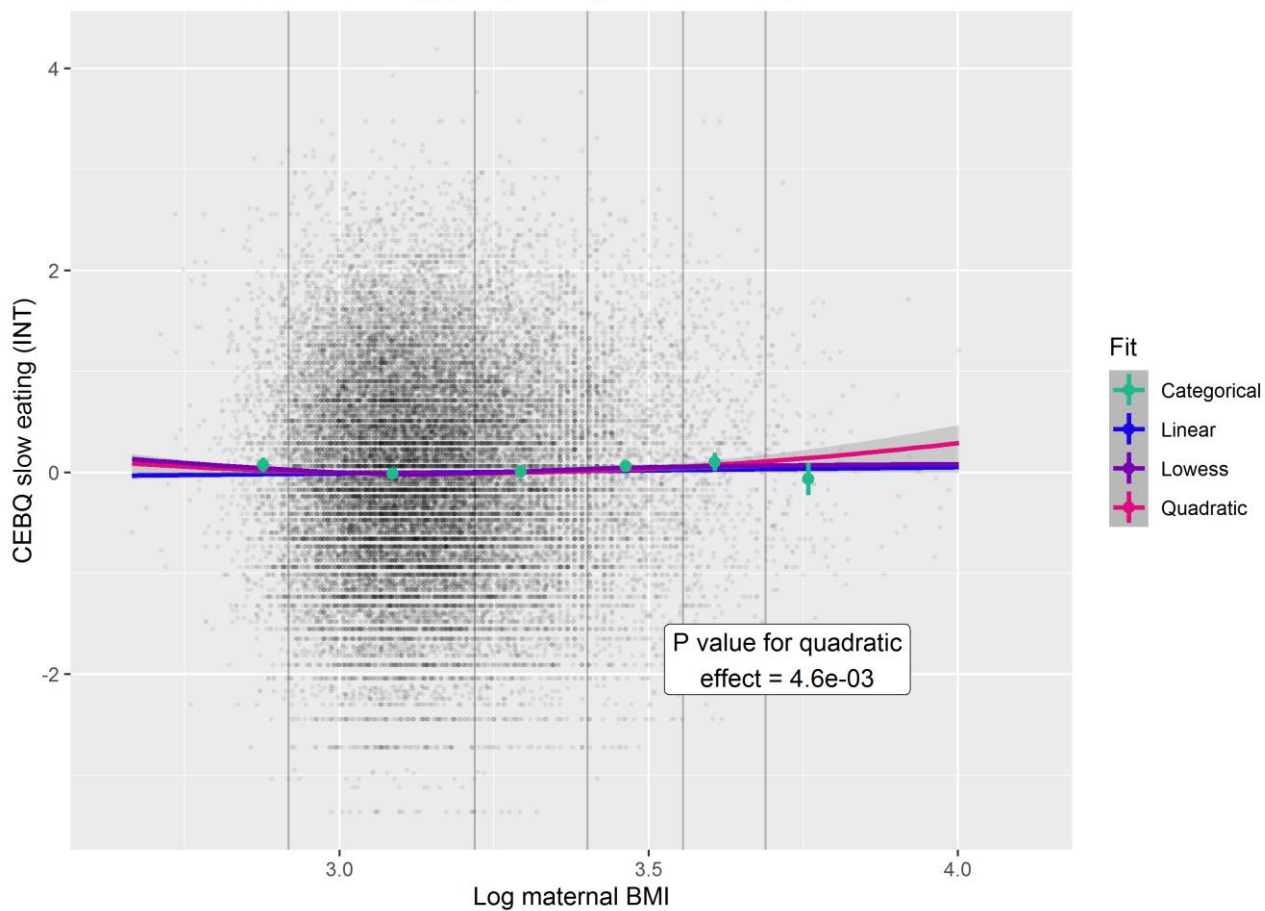

169



CEBQ food responsiveness (INT) vs. log maternal bmi, both sexes

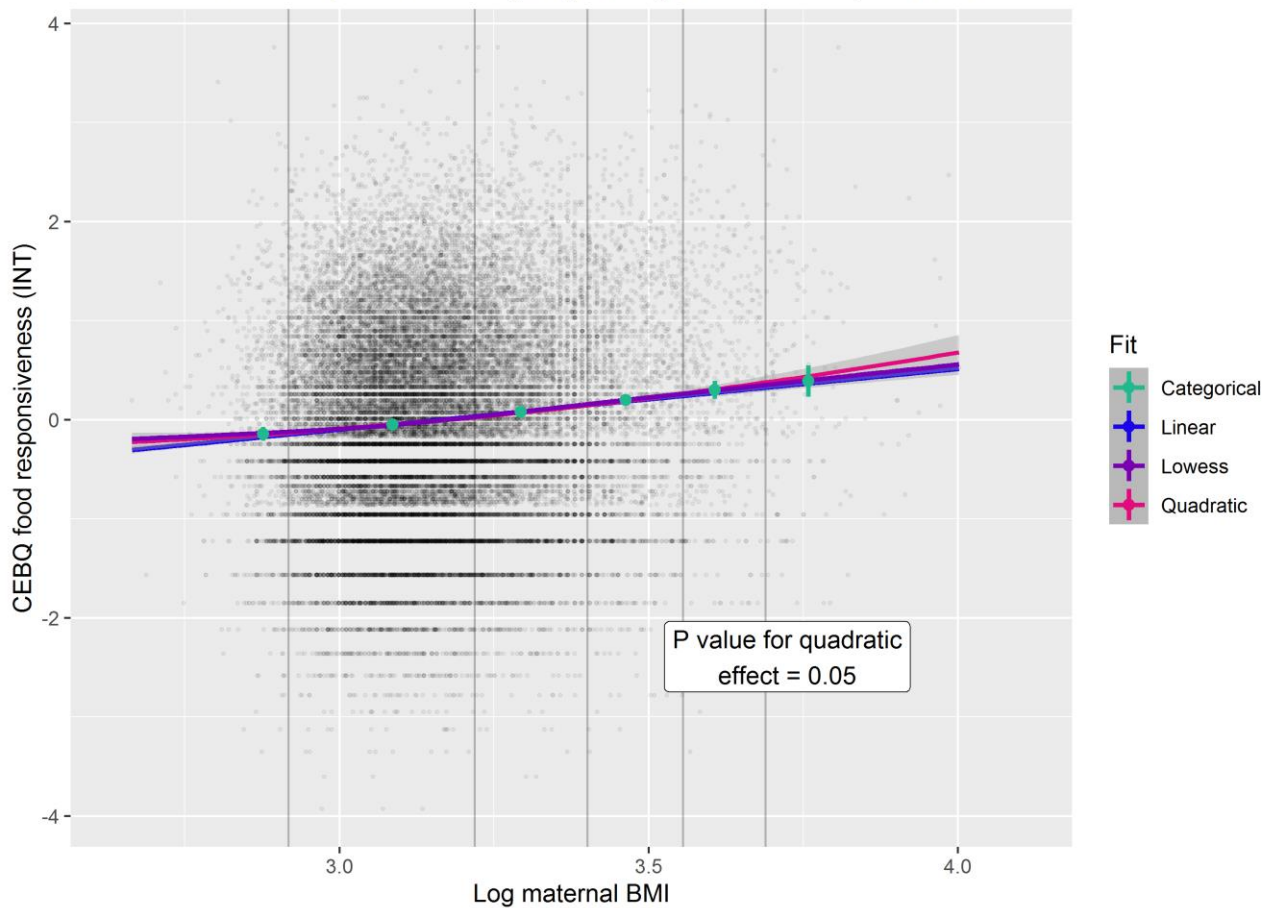

170

CEBQ food focus (INT) vs. log maternal bmi, both sexes

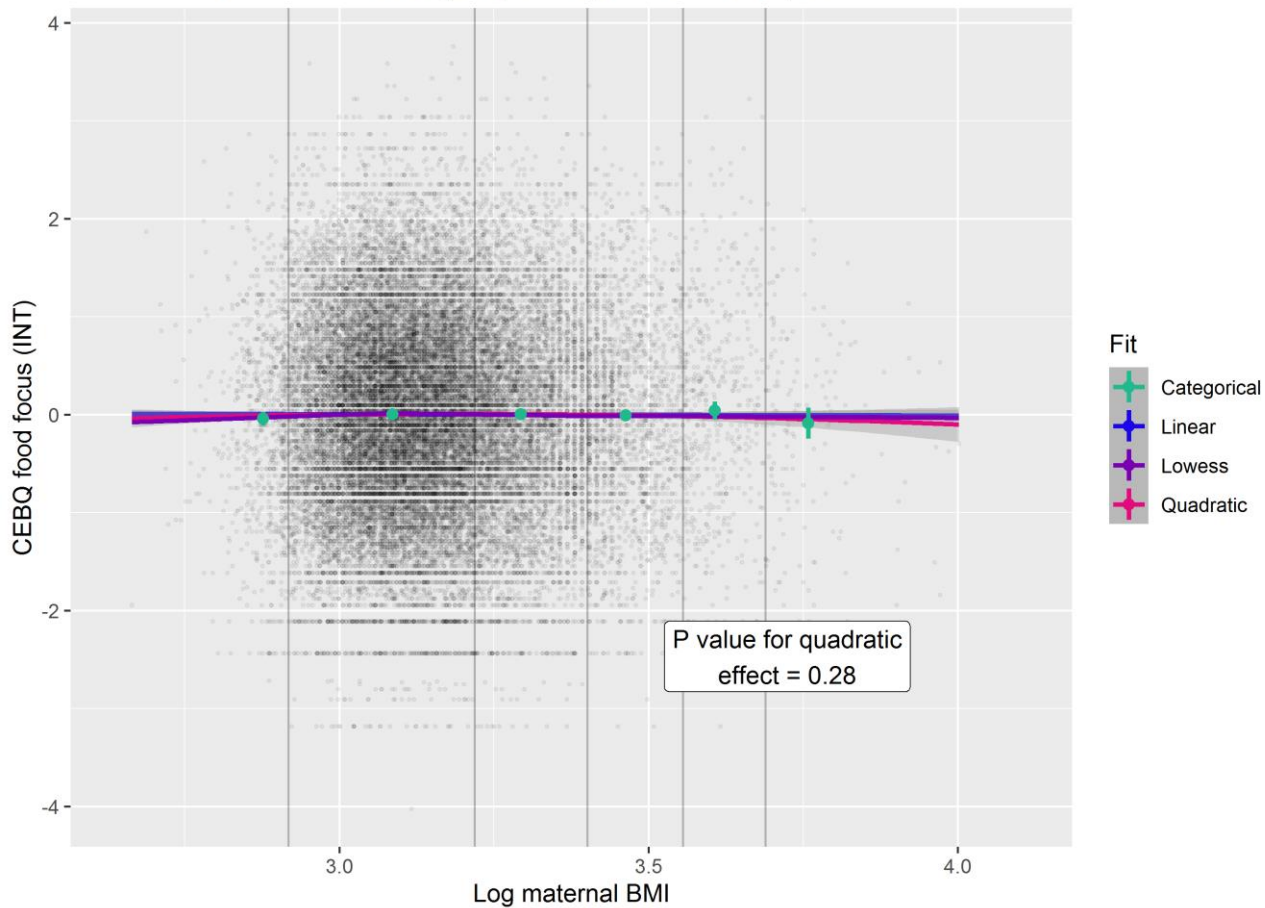

171

CEBQ emotional overeating (INT) vs. log maternal bmi, both sexes

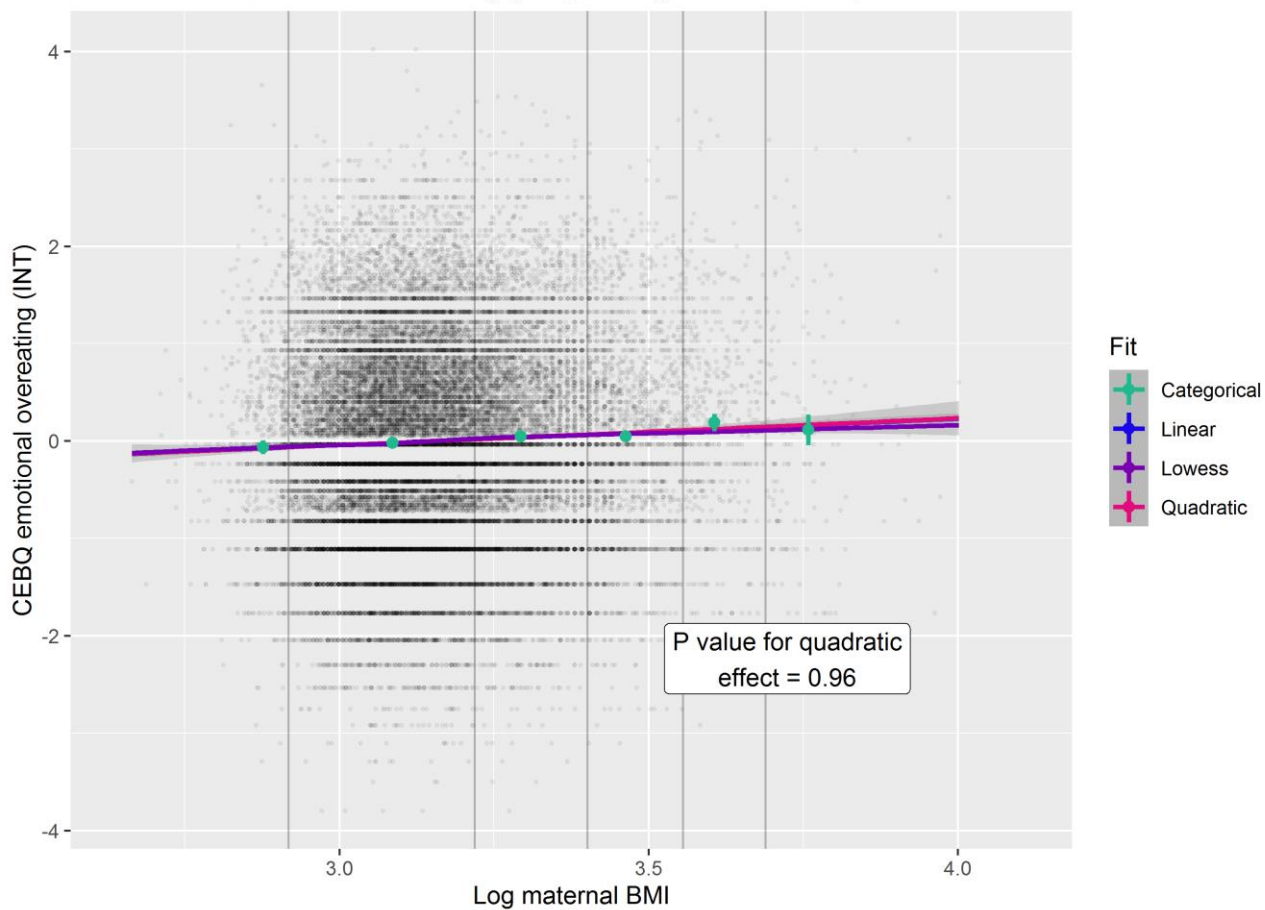

172

CEBQ emotional undereating (INT) vs. log maternal bmi, both sexes

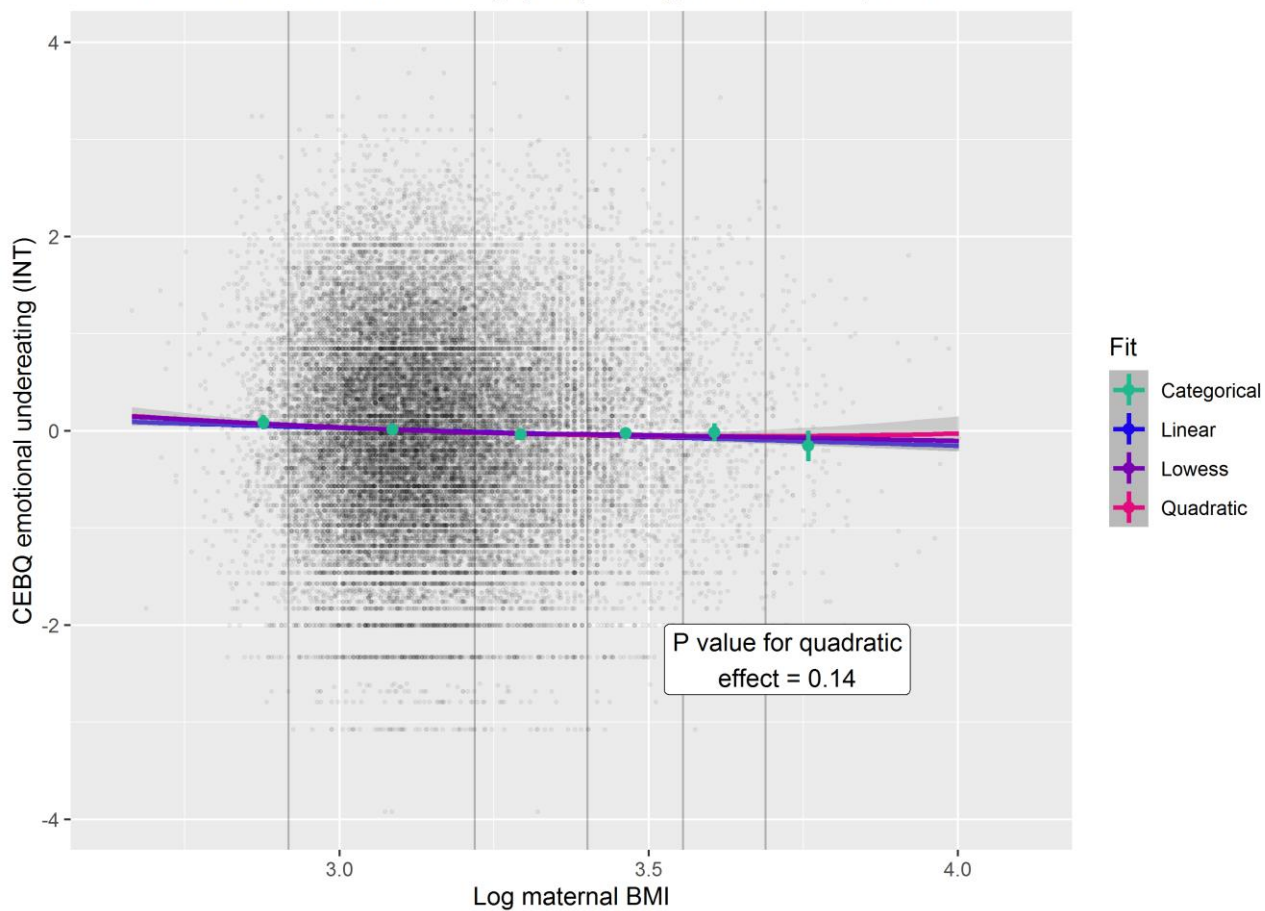

173

Birth weight vs. log paternal bmi, both sexes

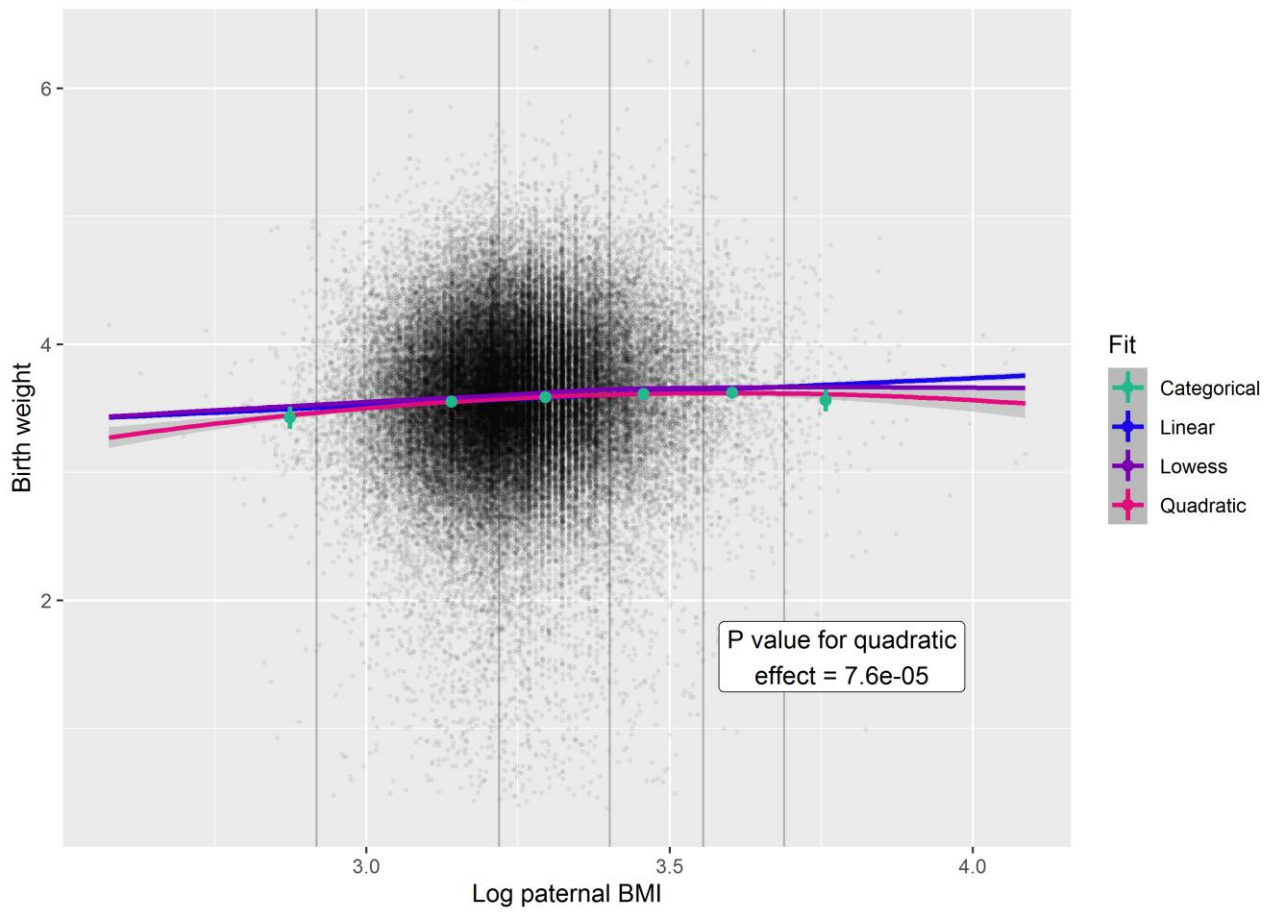

174

6mo BMI vs. log paternal bmi, both sexes

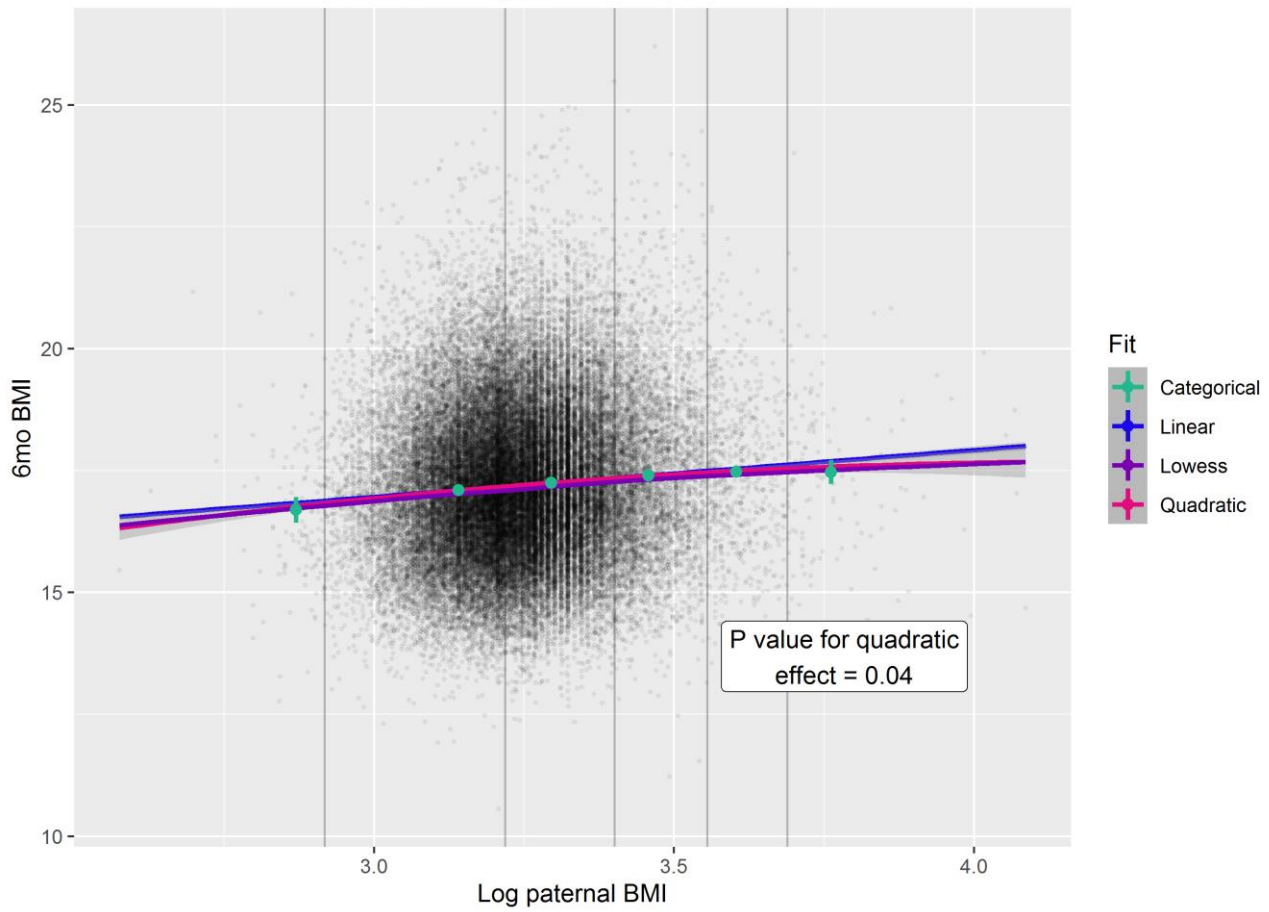

175

1yr BMI vs. log paternal bmi, both sexes

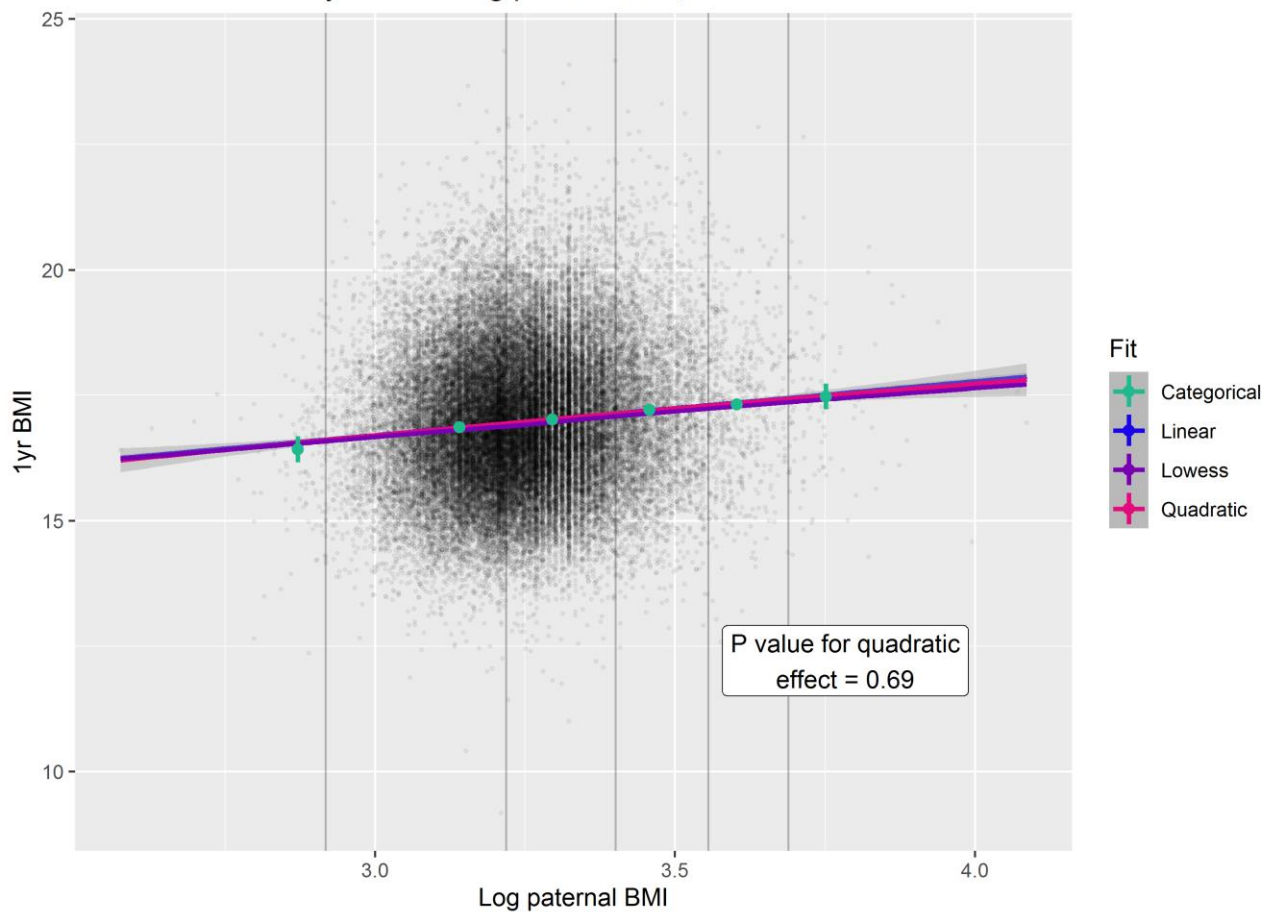

176

2yr BMI vs. log paternal bmi, both sexes

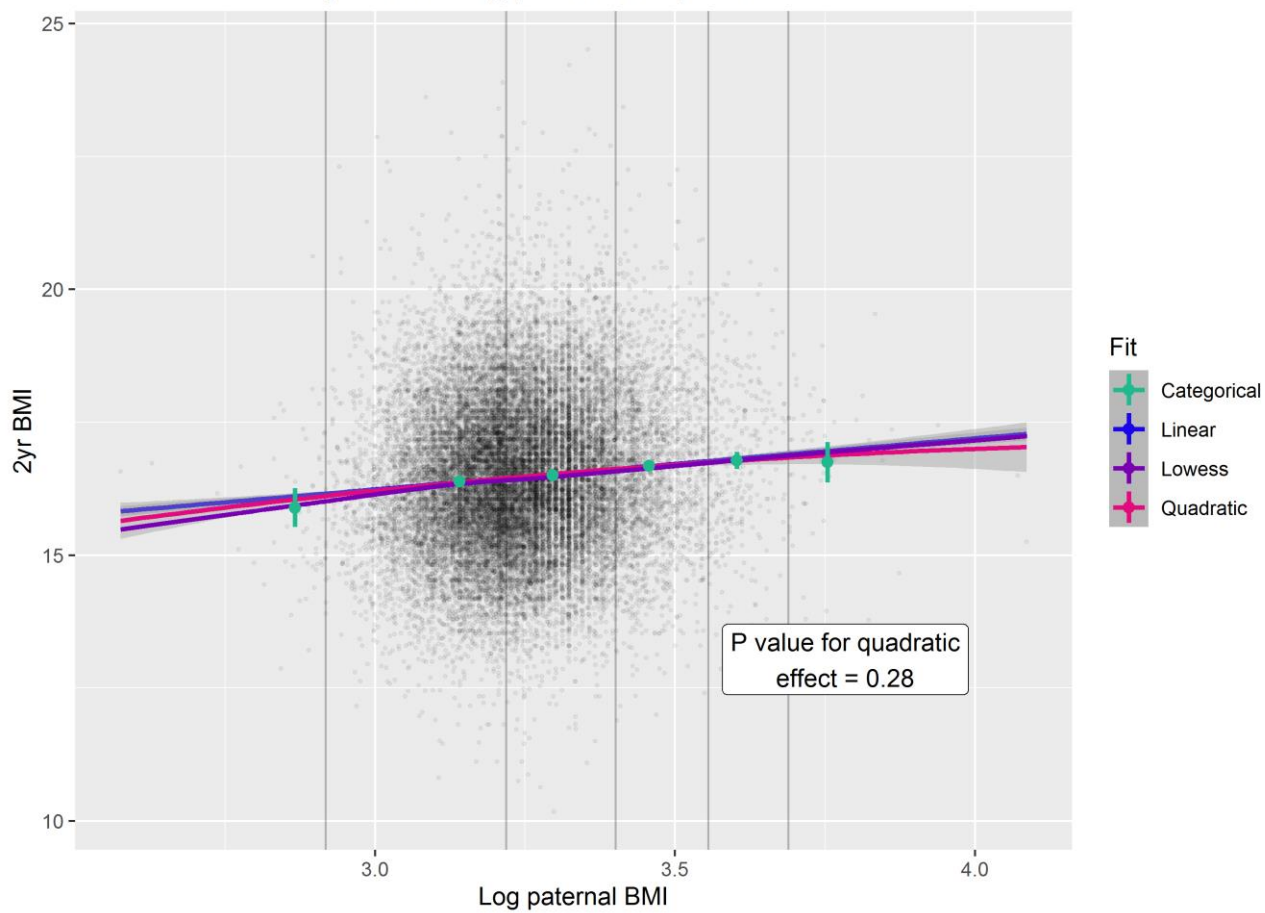

177

3yr BMI vs. log paternal bmi, both sexes

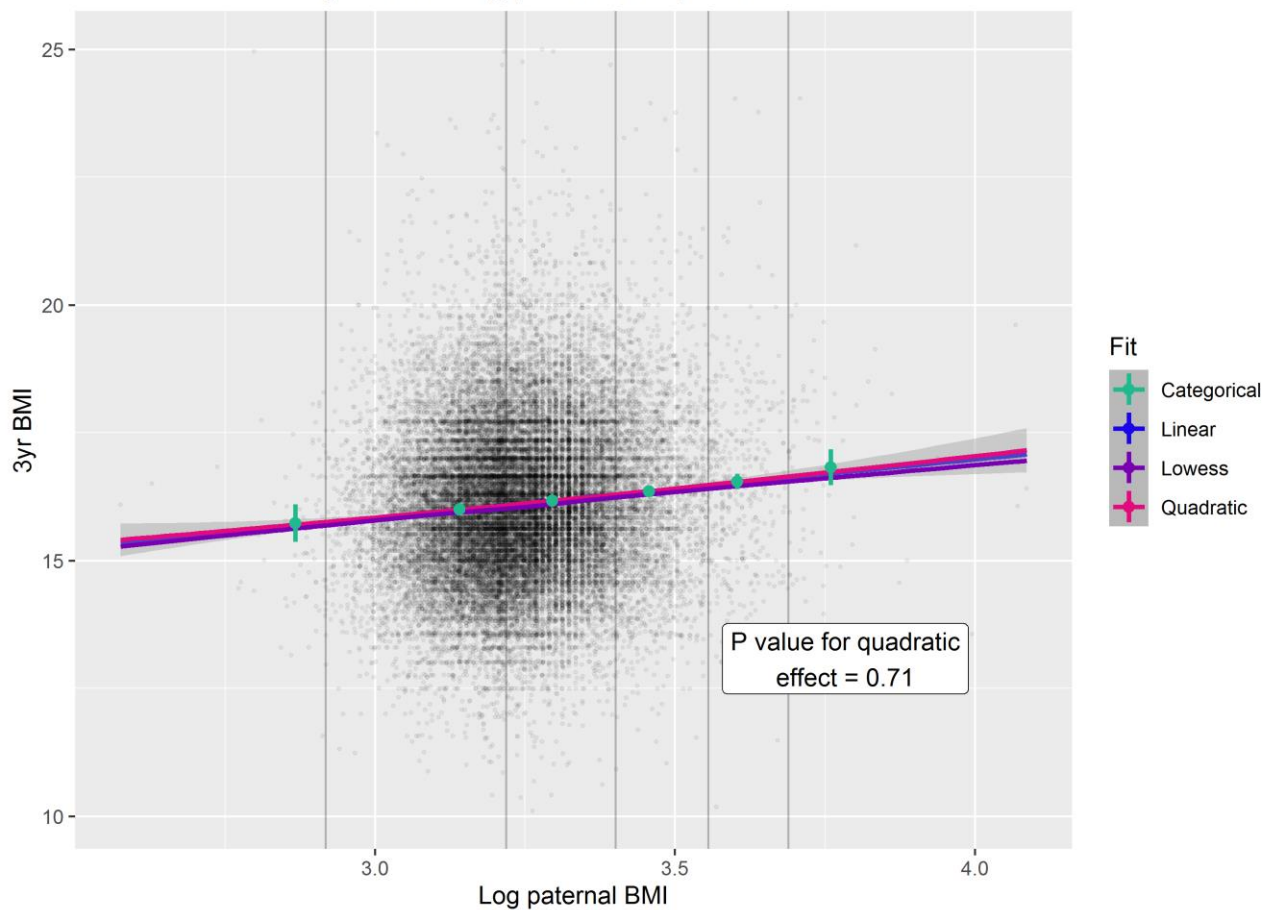

178

Log 5yr BMI vs. log paternal bmi, both sexes

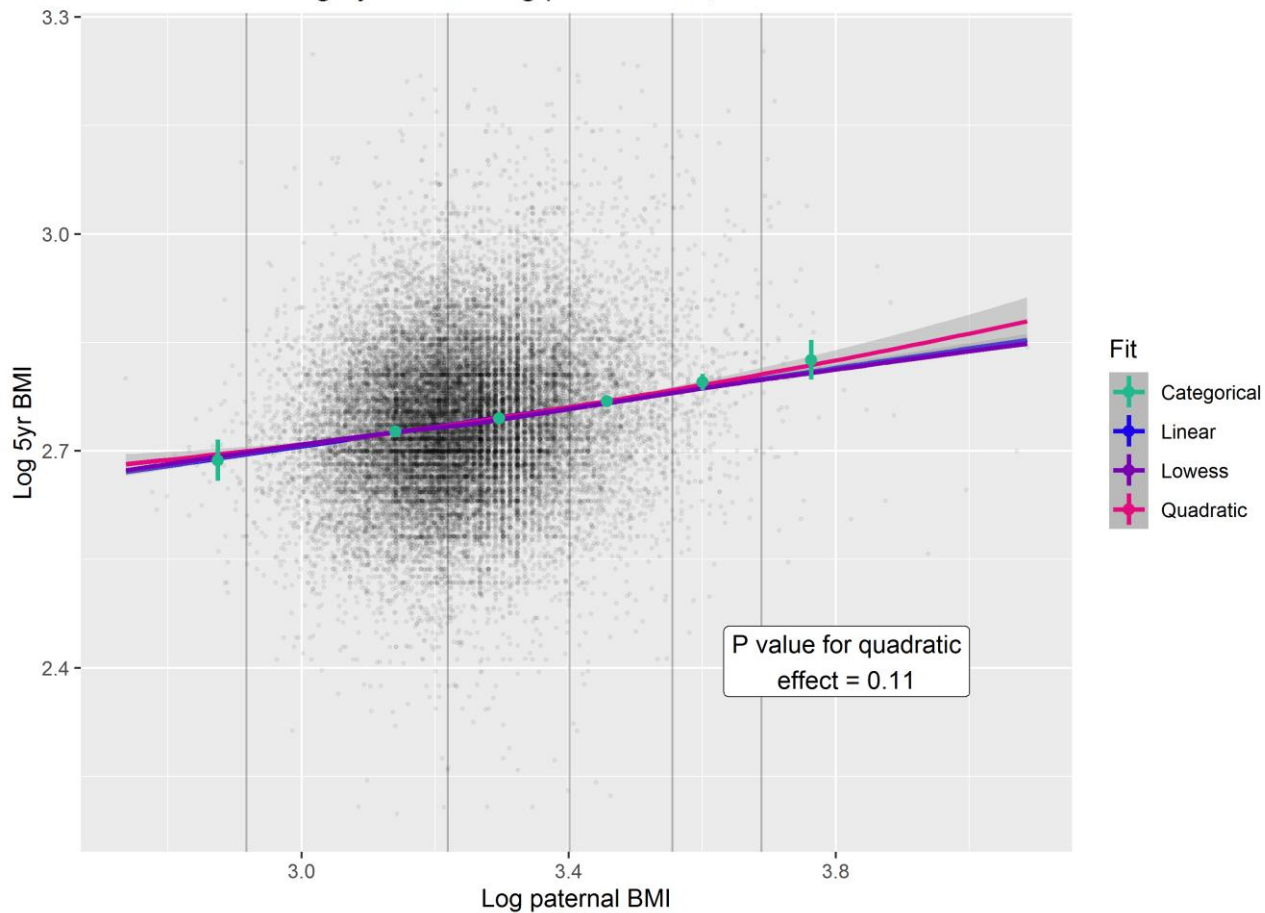

179

Log 8yr BMI vs. log paternal bmi, both sexes

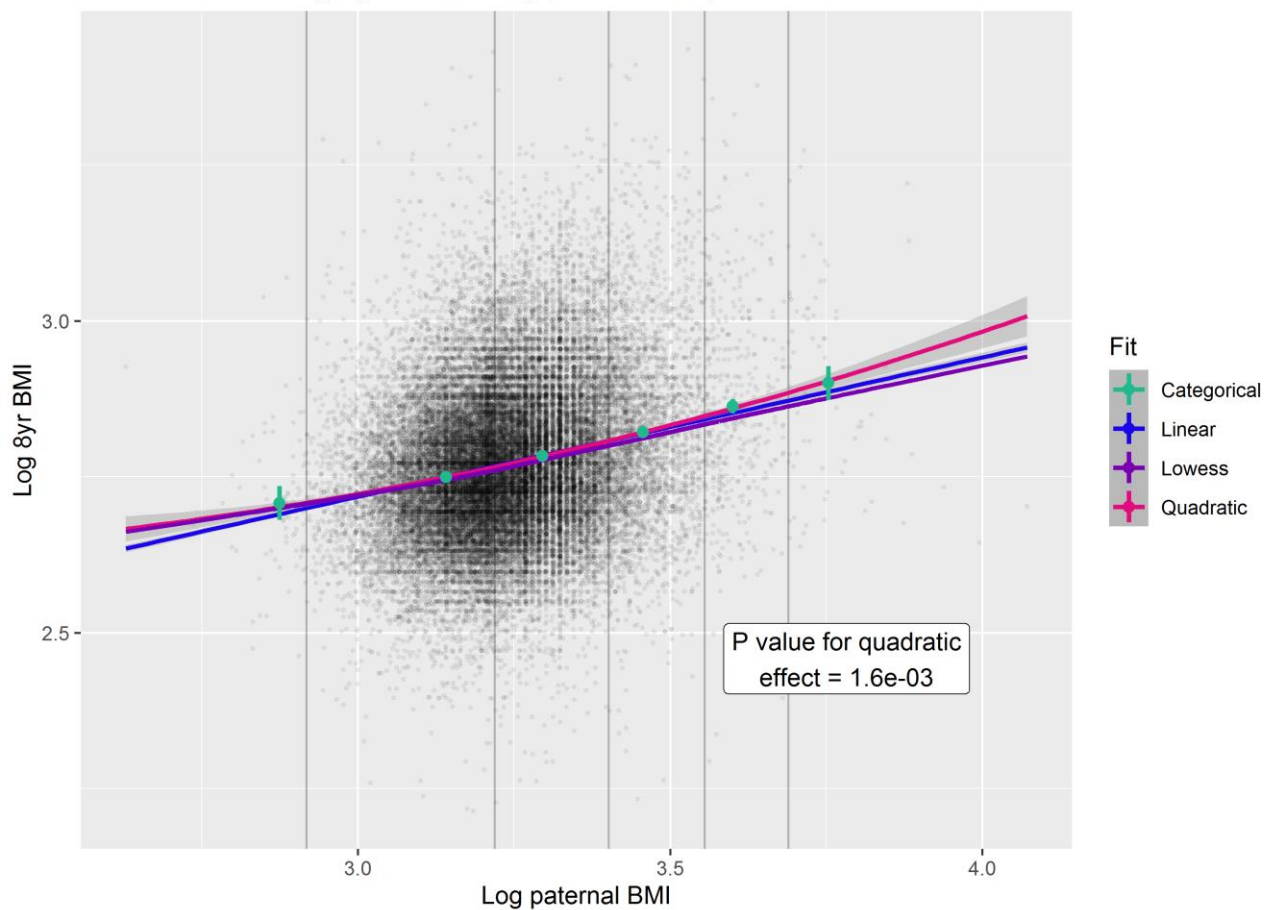

180

1yr predicted BMI vs. log paternal bmi, both sexes

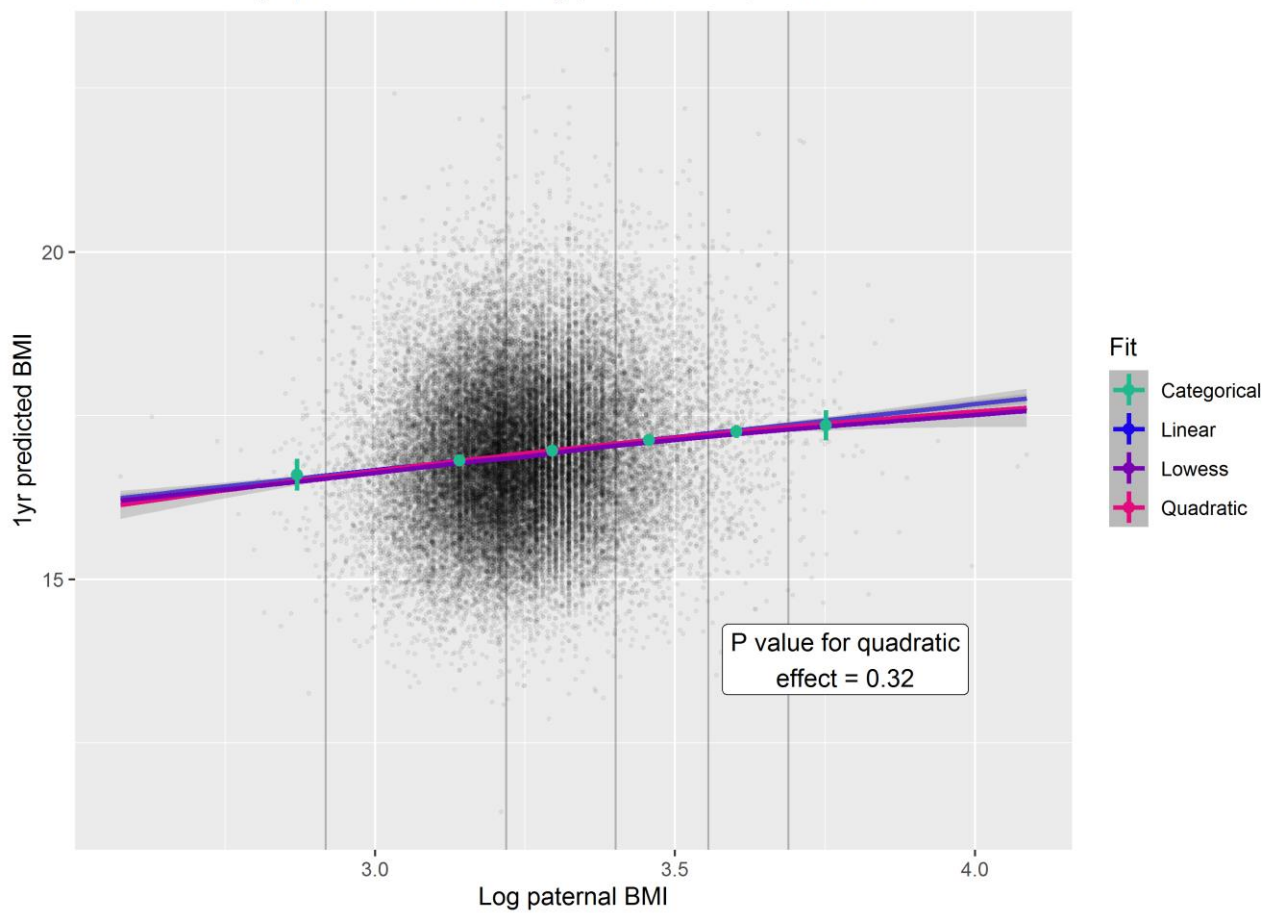

181

2yr predicted BMI vs. log paternal bmi, both sexes

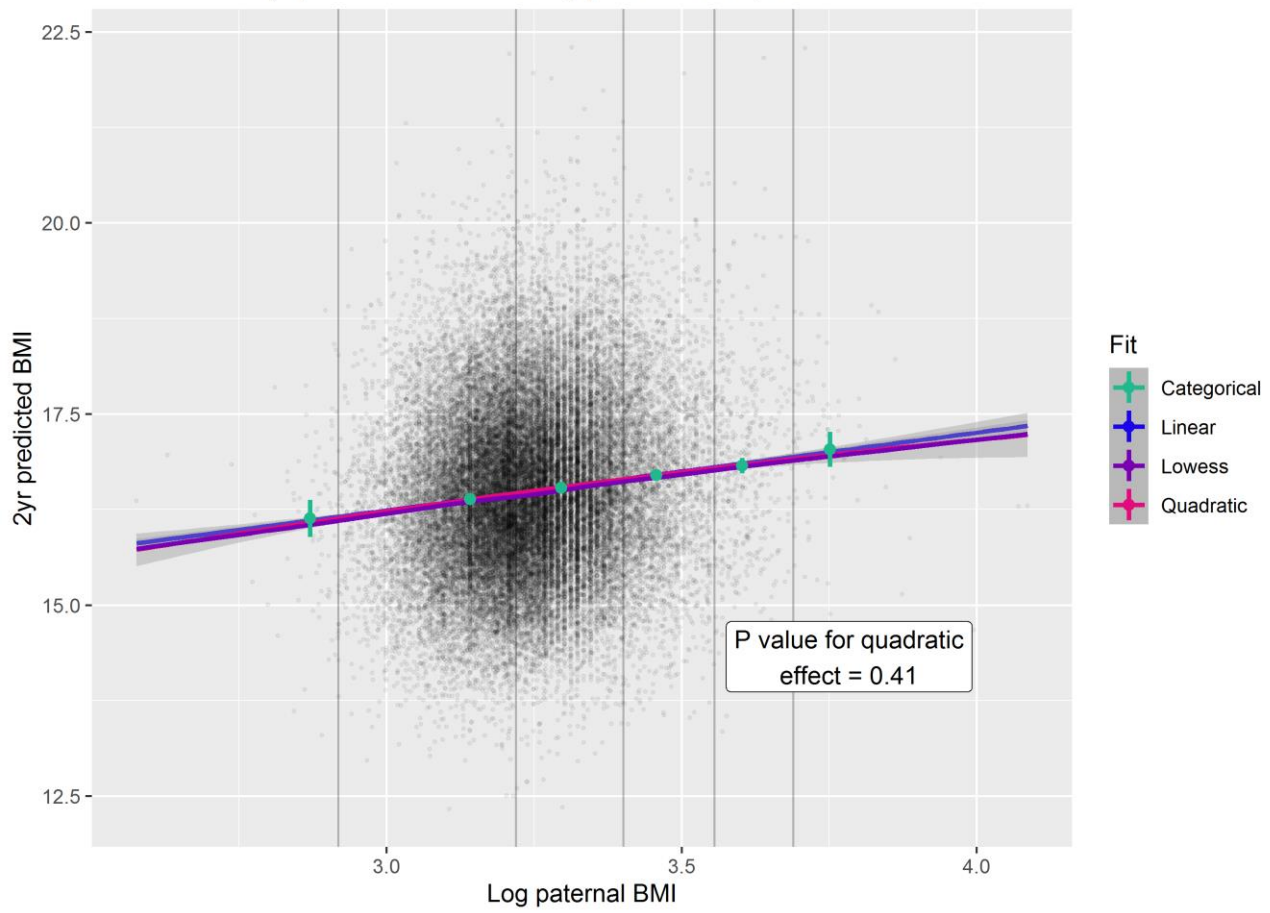

182

3yr predicted BMI vs. log paternal bmi, both sexes

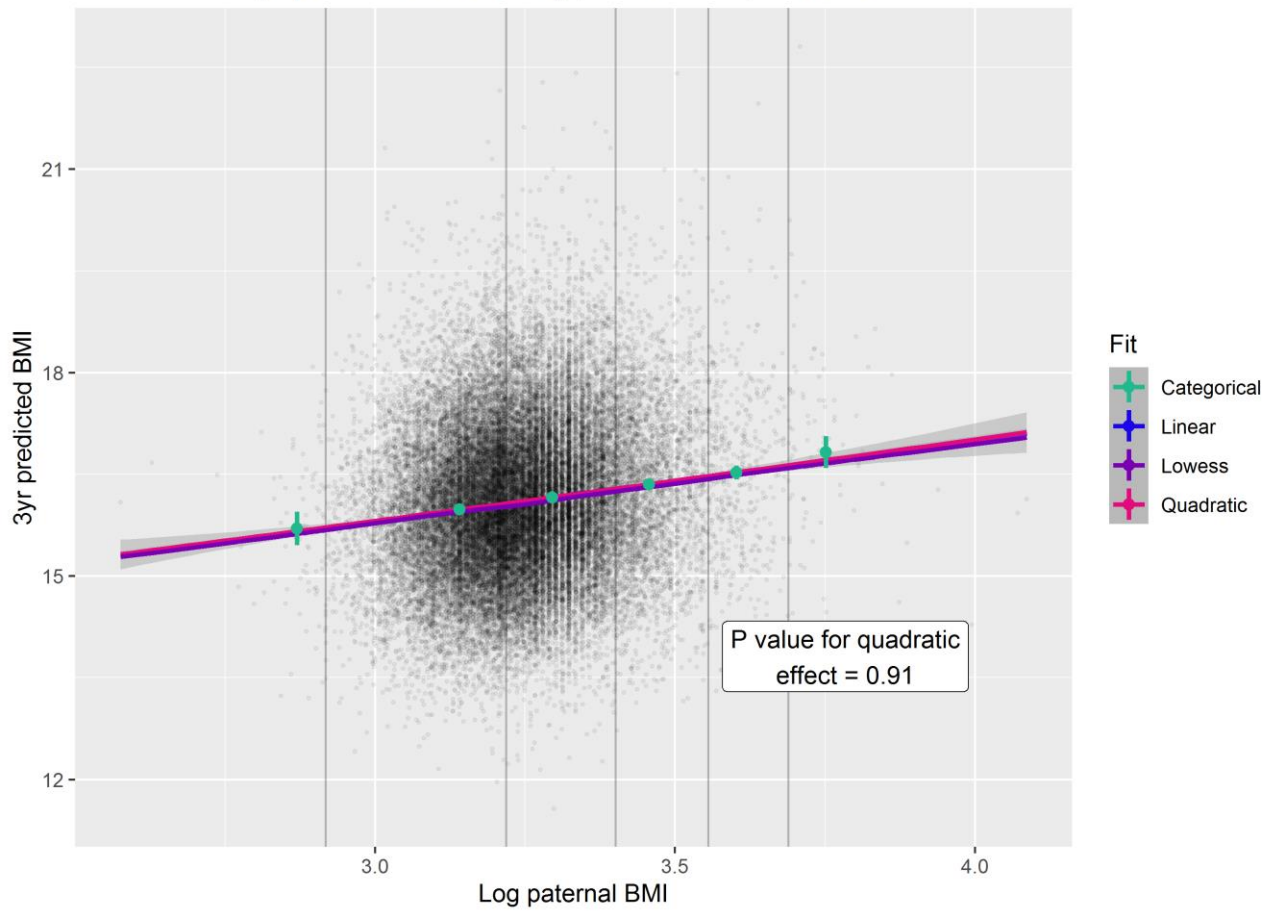

183

4yr predicted BMI vs. log paternal bmi, both sexes

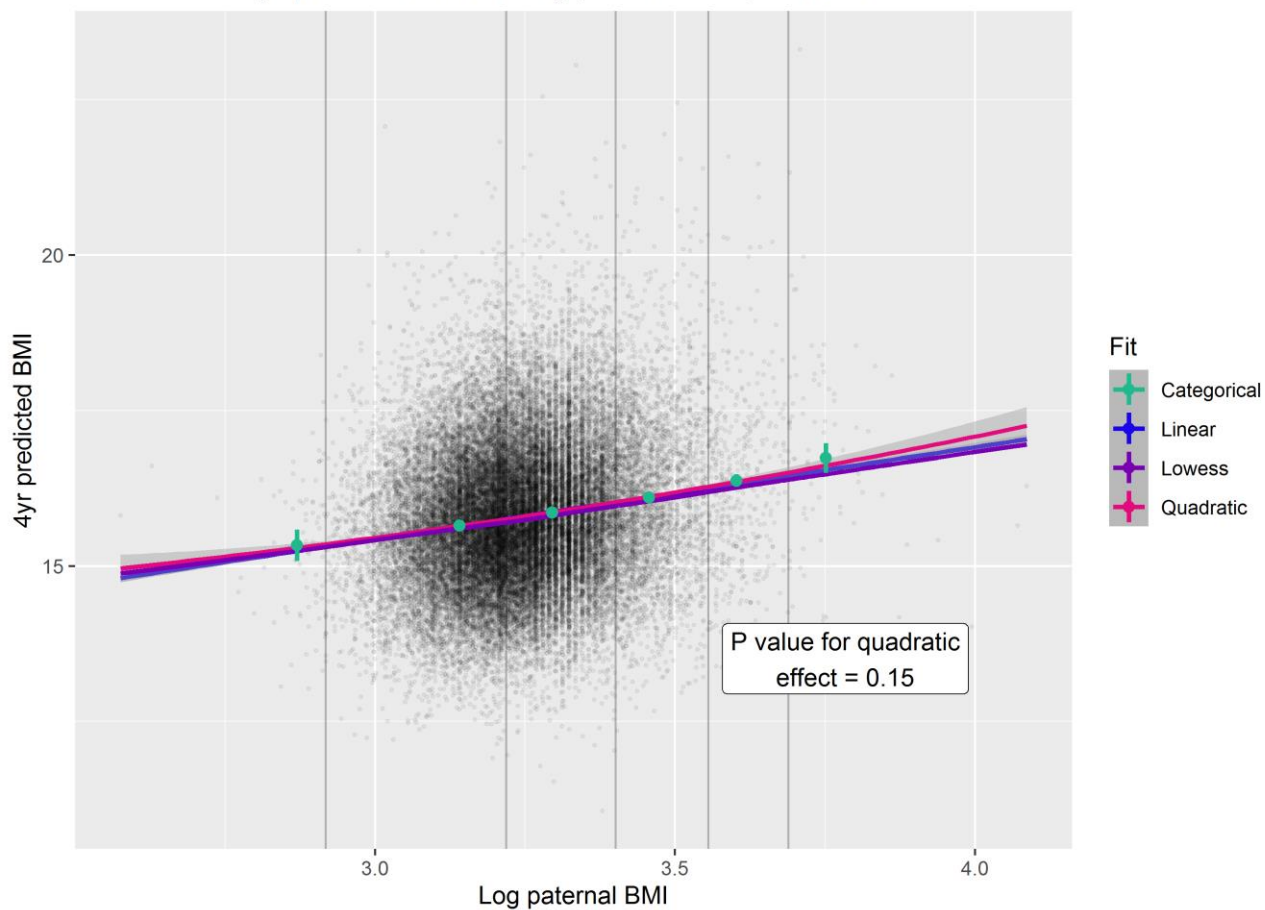

184

Log 5yr predicted BMI vs. log paternal bmi, both sexes

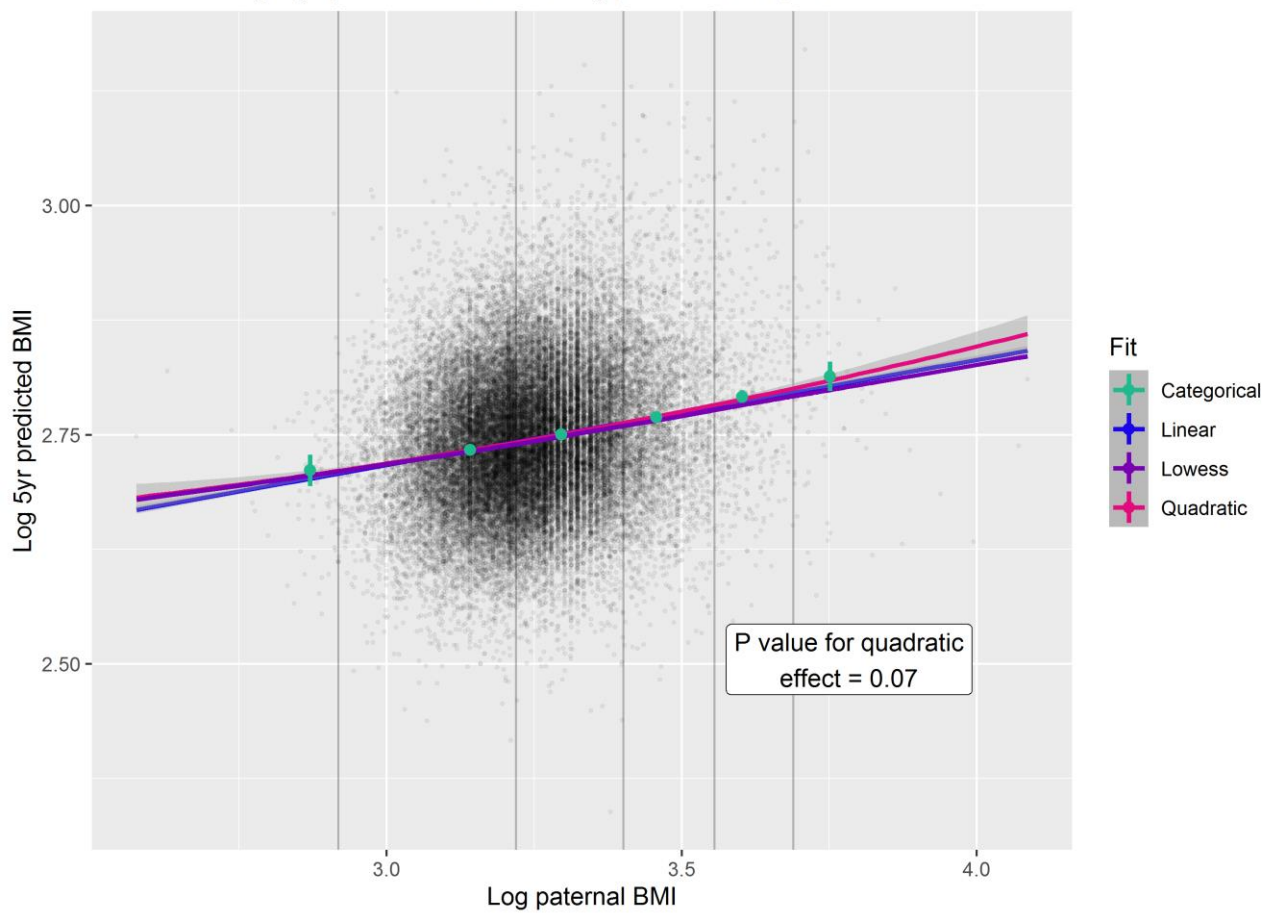

185



Log 6yr predicted BMI vs. log paternal bmi, both sexes

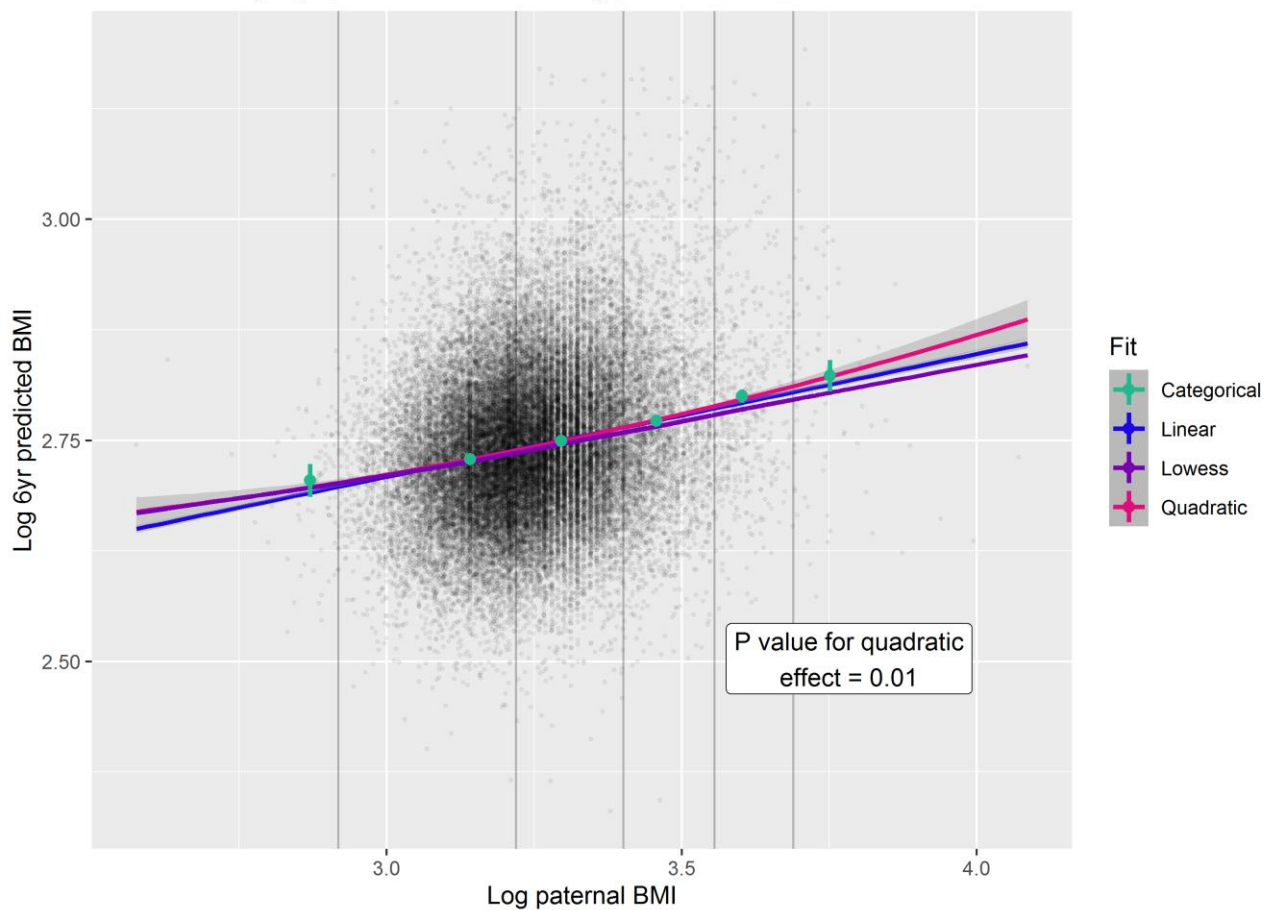

186

Log 7yr predicted BMI vs. log paternal bmi, both sexes

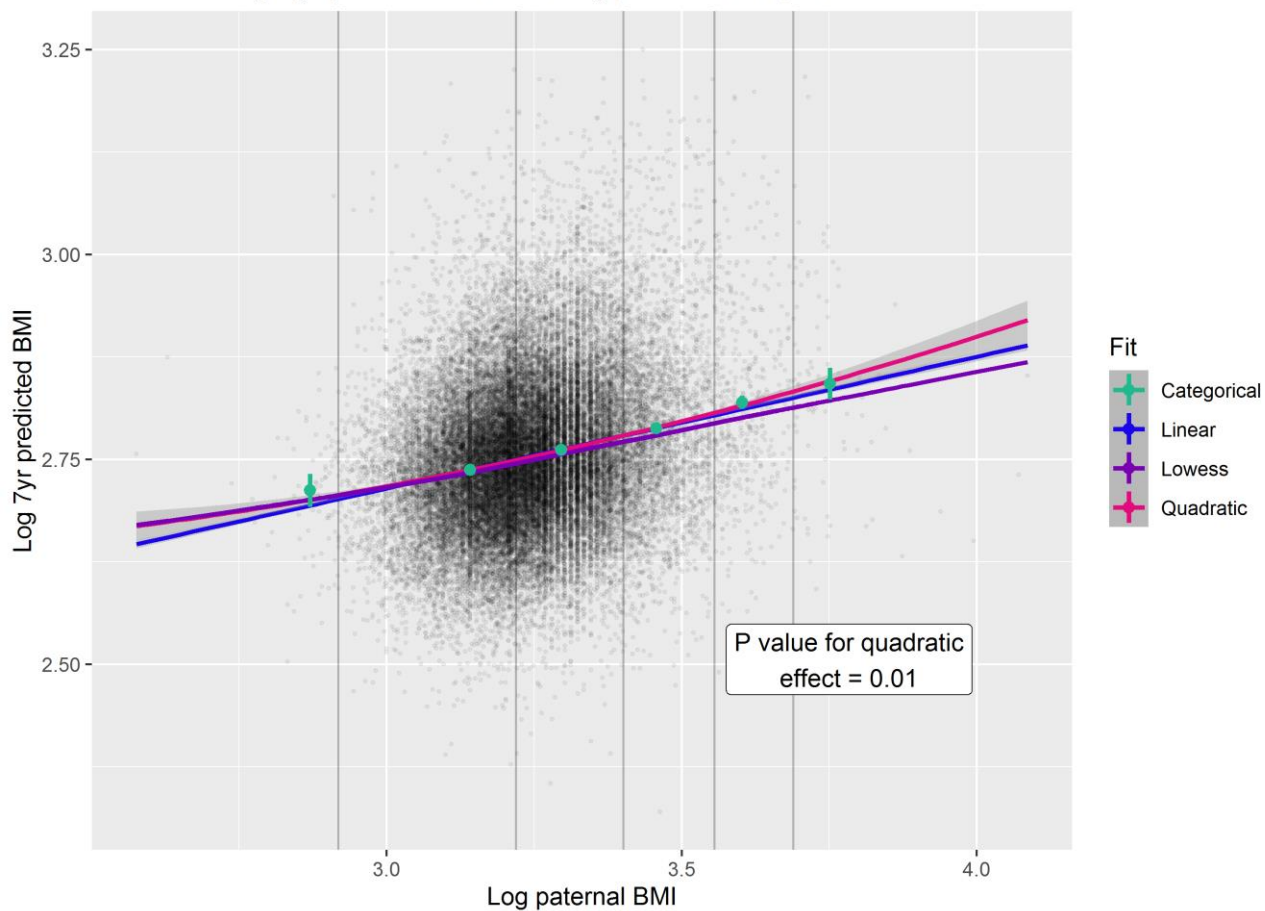

187

Log 8yr predicted BMI vs. log paternal bmi, both sexes

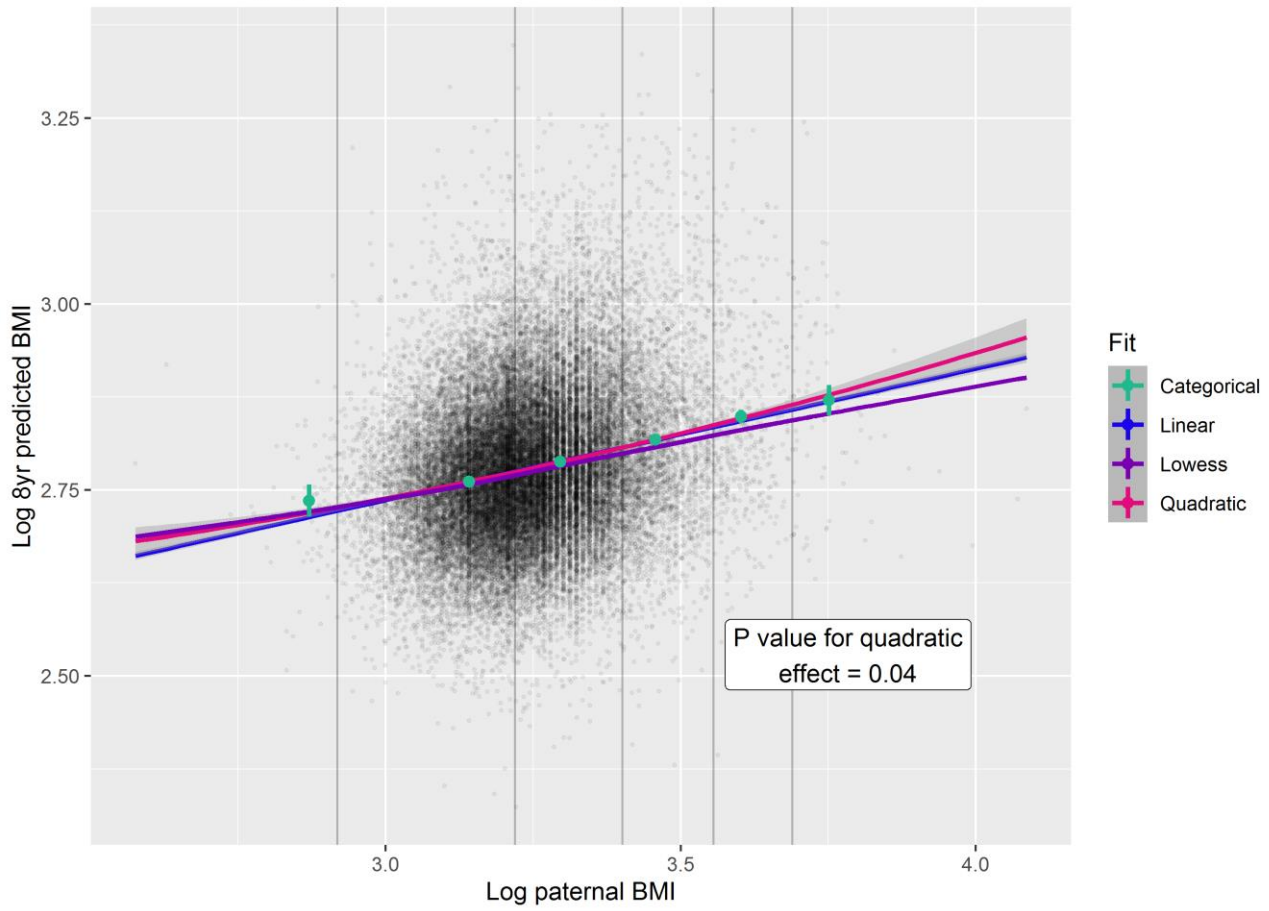

188

CEBQ satiety responsiveness (INT) vs. log paternal bmi, both sexes

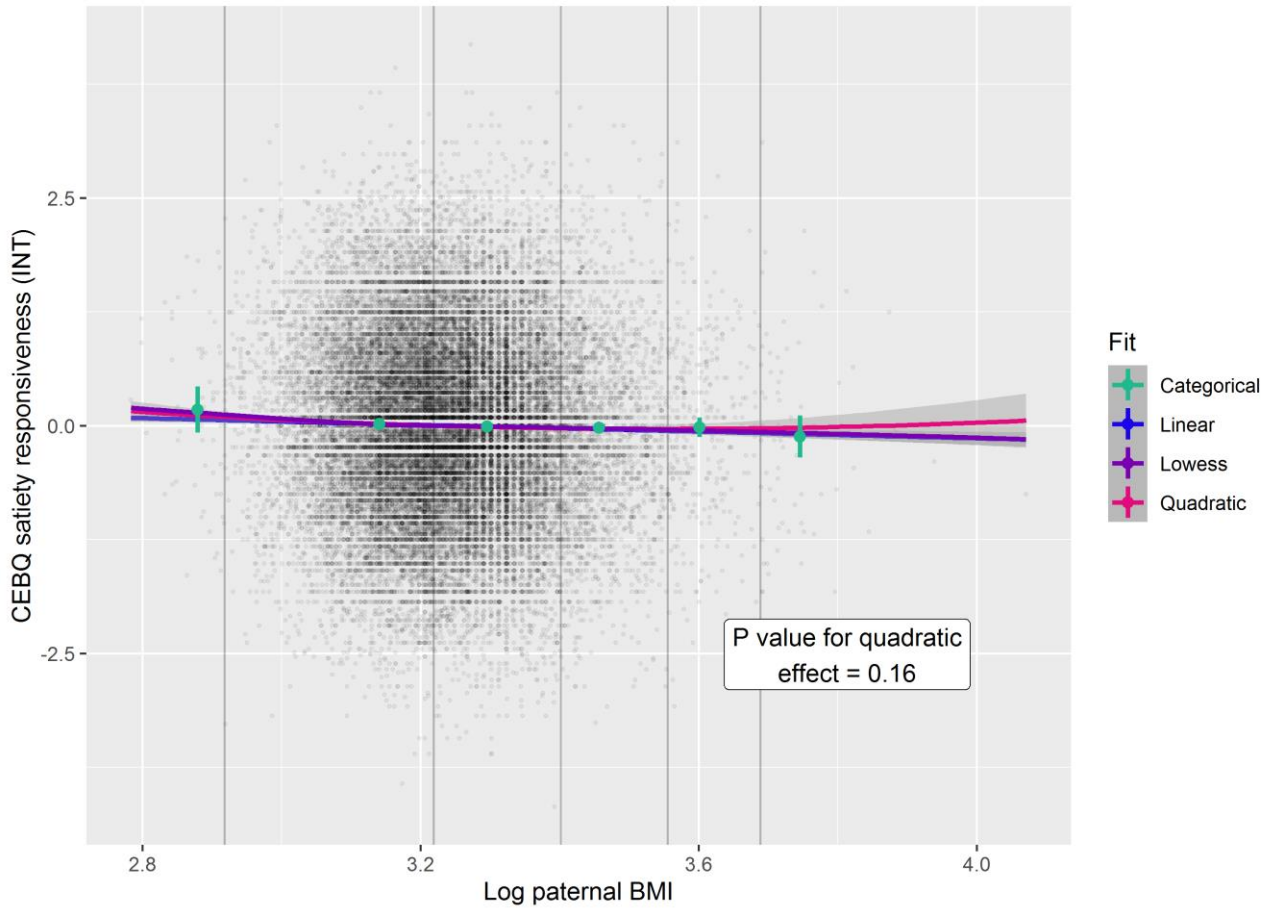

189

CEBQ slow eating (INT) vs. log paternal bmi, both sexes

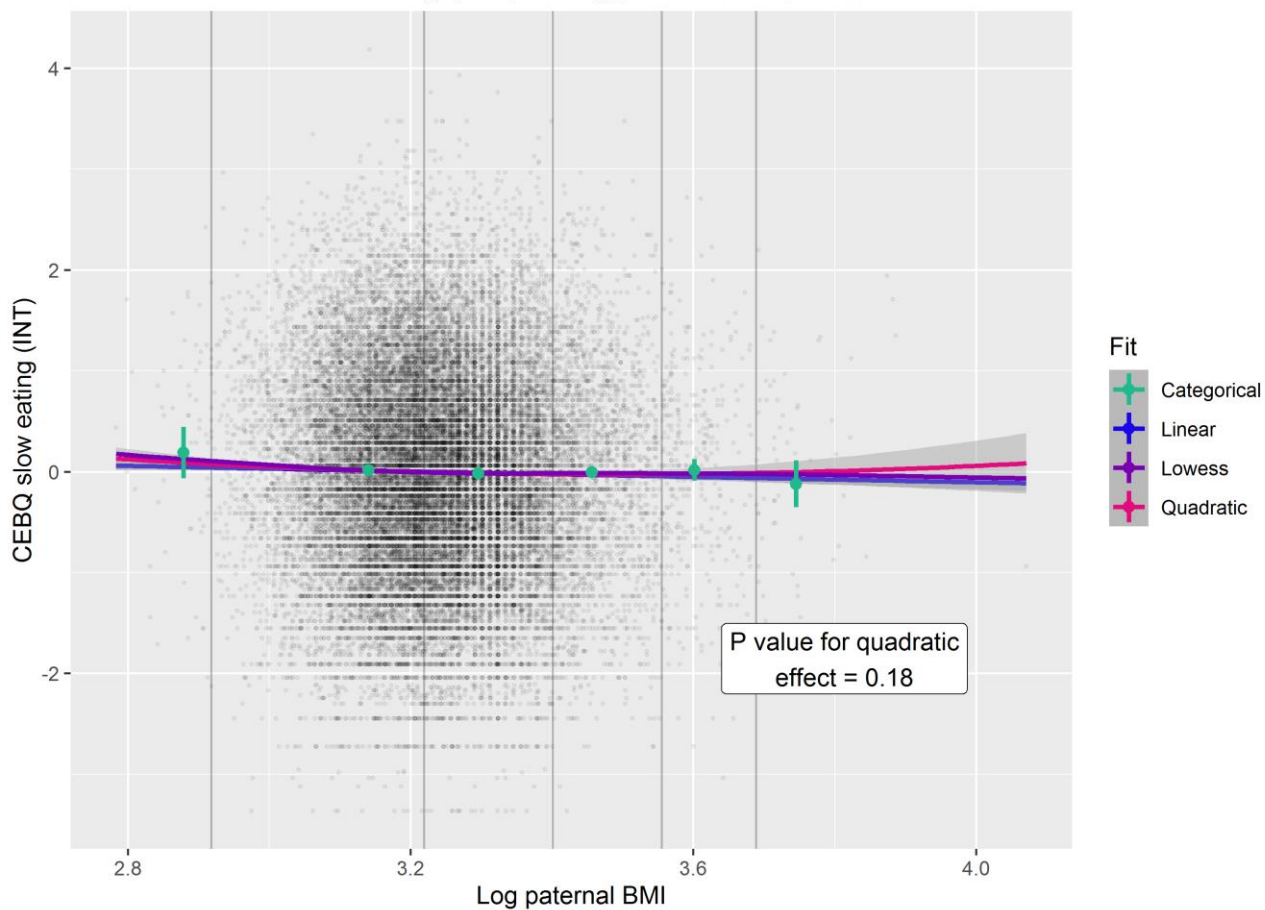

190

CEBQ food responsiveness (INT) vs. log paternal bmi, both sexes

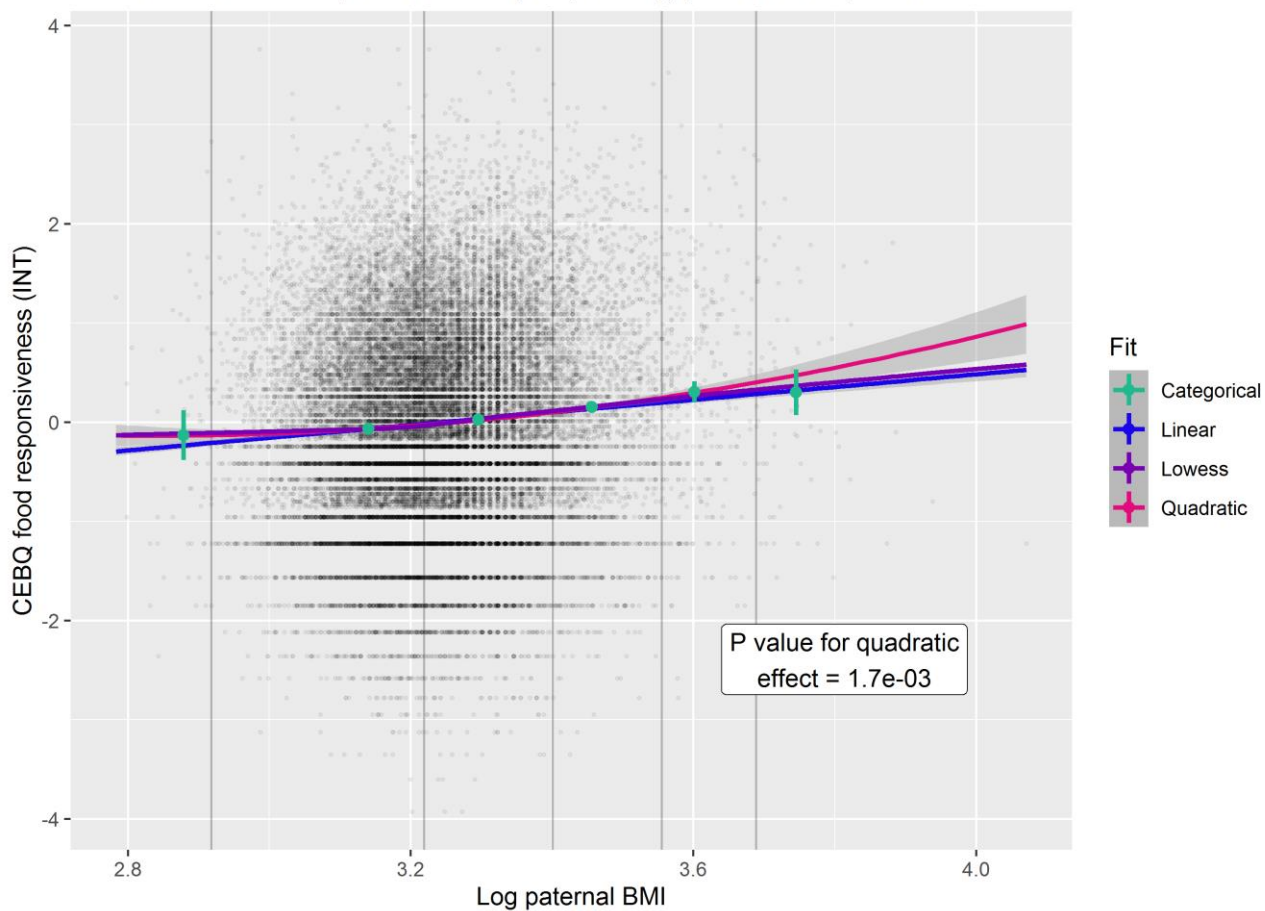

191

CEBQ food focus (INT) vs. log paternal bmi, both sexes

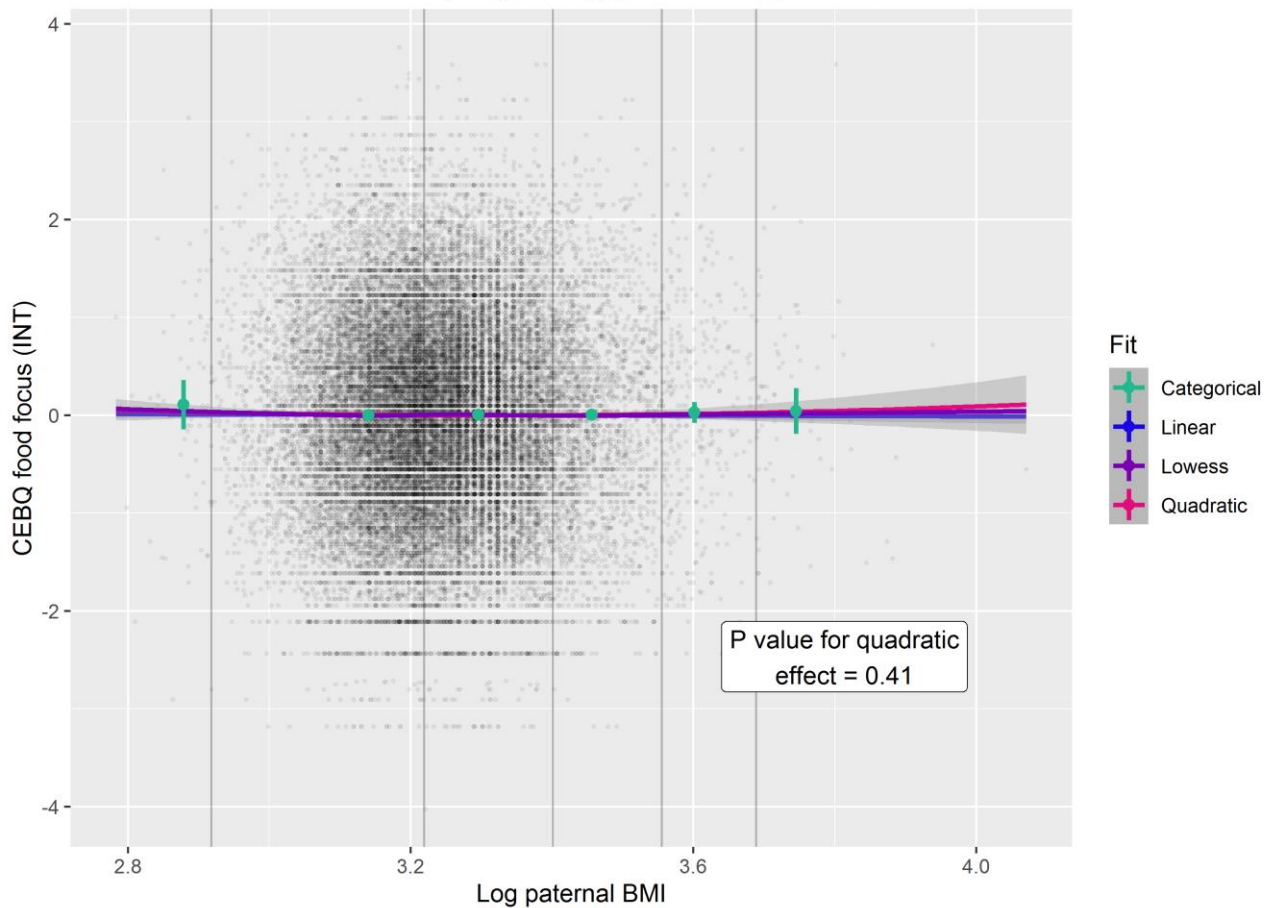

192

CEBQ emotional overeating (INT) vs. log paternal bmi, both sexes

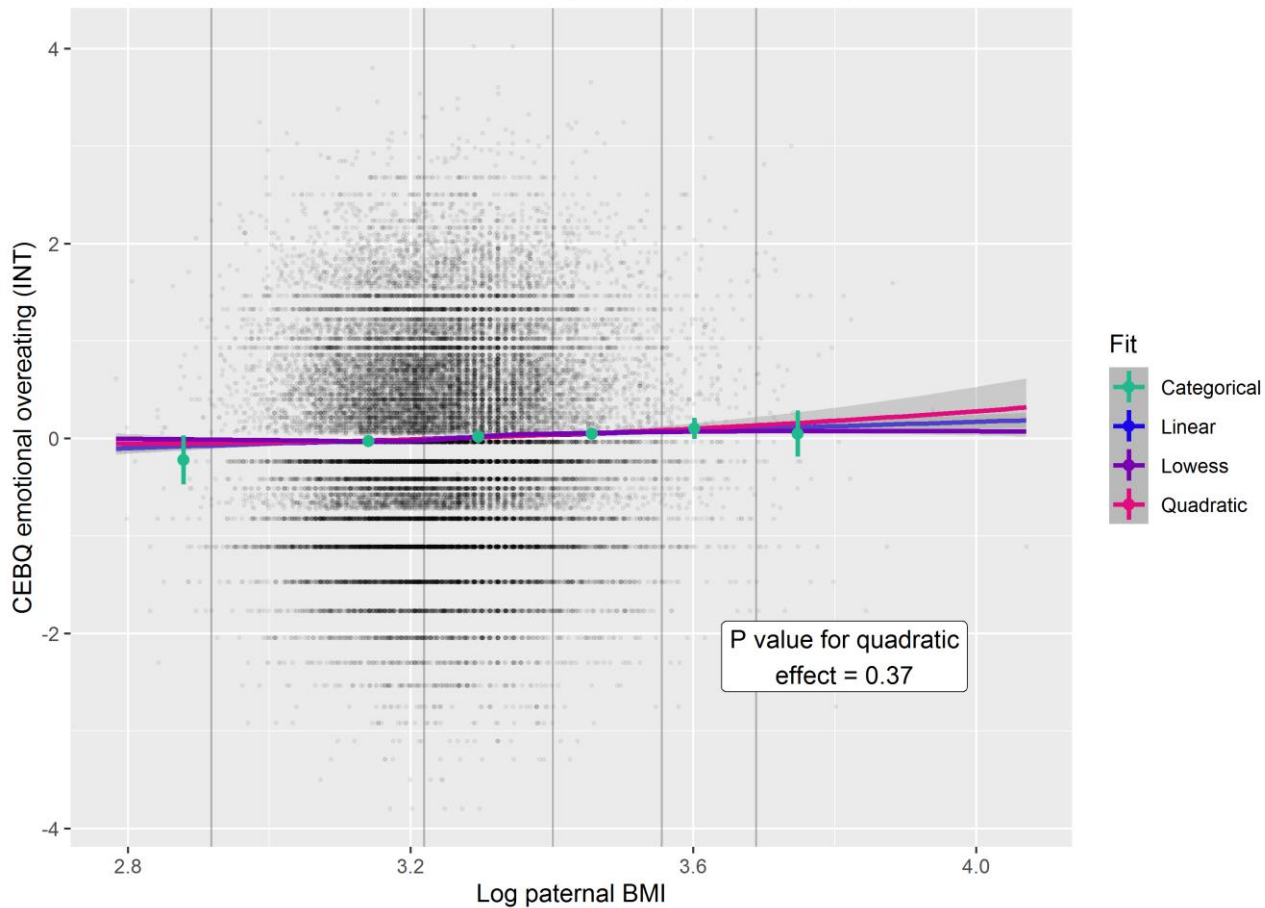

193

CEBQ emotional undereating (INT) vs. log paternal bmi, both sexes

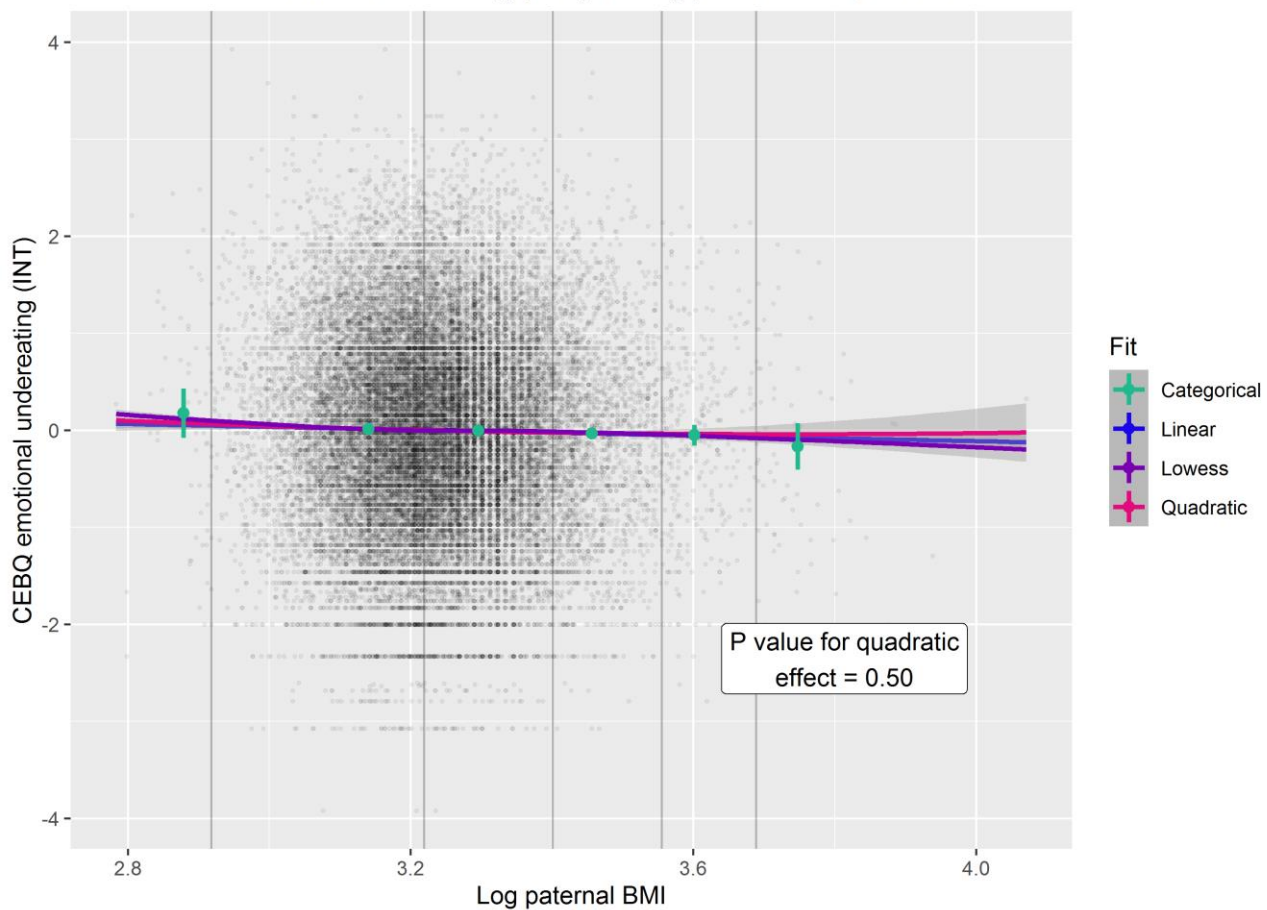

194

195

196 **Supplementary information S8: Multiple Children of Twins and Siblings (MCoTS) model**

197 To quantify the extent to which exposure-outcome associations were due to genetic confounding, we fitted a  
198 genetically informed structural equation model (SEM) in a subset of the MoBa sample. This SEM is an extension of  
199 the classic twin design (CTD) which has been widely used to estimate heritability (i.e. the proportion of phenotypic  
200 variance that is due to genetic effects). Because monozygotic (MZ) twins are genetically identical but dizygotic (DZ)  
201 twins are on average only 50% genetically similar, the expected phenotypic similarity of a heritable trait will be  
202 greater for MZ versus DZ twins. Building on the CTD, a Children of Twins design exploits the fact that such patterns of  
203 genetic and phenotypic similarity are mirrored in relatives of twins (5). This enables estimation of the extent to  
204 which phenotypic similarity between parents and offspring is due to genetic similarity (i.e. genetic confounding). For  
205 example, an MZ twin is 50% genetically similar to the child of their co-twin, but a DZ twin will be on average only  
206 25% genetically similar to the child of their co-twin. If these relatedness coefficients are reflected by patterns of  
207 phenotypic similarity this provides evidence for genetic confounding. We fit an extended children of twins SEM (the  
208 Multiple Children of Twins and Siblings [MCoTS] model, described in the path diagrams below and elsewhere (5)).

209

210

211

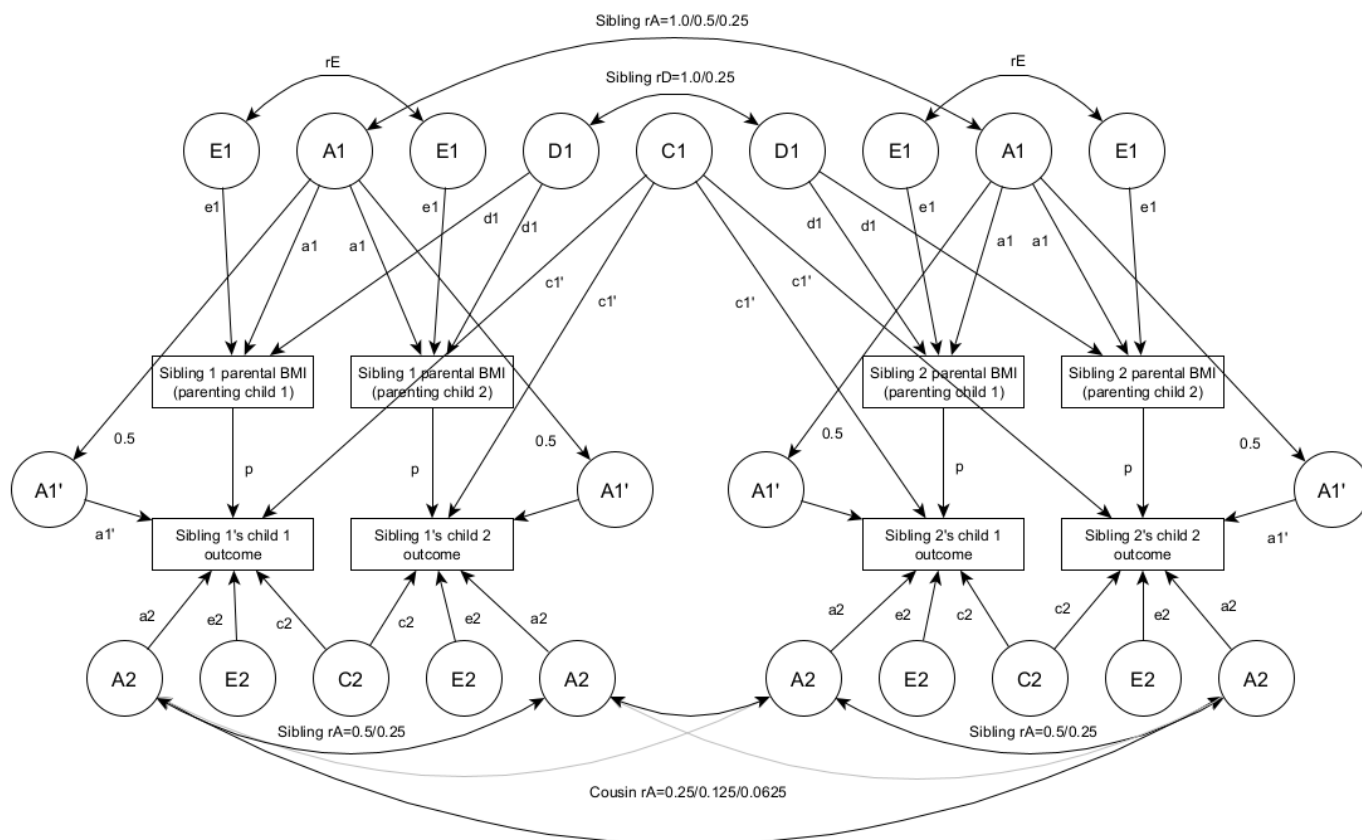

212

213 Sibling 1 and sibling 2 are full siblings, half siblings, dizygotic twins or monozygotic twins, in the parent generation.  
 214 Outcomes are included for up to two children of each parental sibling, and parental BMI is allowed to vary between  
 215 pregnancies via the correlation  $r_E$ . Genetic correlations are set according to quantitative genetic theory (6). Additive  
 216 genetic correlations between sibling pairs (Sibling  $r_A$ ) are set at 1.0, 0.5 or 0.25 for monozygotic twins, dizygotic  
 217 twins/full siblings and half siblings respectively. Additive genetic correlations between cousin pairs (Cousin  $r_A$ ) are  
 218 set at 0.25, 0.125 or 0.0625 for cousins related via monozygotic twins, dizygotic twins/full siblings and half siblings  
 219 respectively. Dominance genetic correlations between sibling pairs (Sibling  $r_D$ ) are set at 1.0 or 0.25 for monozygotic  
 220 twins and dizygotic twins/full siblings respectively and are zero for half siblings. Latent (unmeasured) variables are  
 221 shown in circles, measured variables are shown in rectangles, single headed arrows denote causal paths, and double  
 222 headed arrows denote covariances. A1: additive genetic effects on parental BMI, D1: dominance genetic effects on  
 223 parental BMI, E1: nonshared environmental effects on parental BMI, A1': genetic effects common to parental BMI  
 224 and offspring outcome, C1: extended family effects, A2: additive genetic effects specific to the offspring outcome,  
 225 C2: shared environmental effects on offspring outcome, E2: nonshared environmental effect on offspring outcome,  
 226 p: "phenotypic" effect, including any causal effect of parental BMI on the offspring outcome, as well as residual (non-  
 227 genetic) confounding,  $r_E$ : within-parent correlation between E1 for parenting child 1 and child 2. The path between  
 228 A1 and A1' is fixed to 0.5, because parents share 50% of their genome identical by descent with their children. For  
 229 simplicity, variance paths have been omitted, but variance was 1 for all latent variables. Consequently, for A1'  
 230 residual variance after accounting for the path between A1' and A1 is 0.75. MCoTS SEM were fit in R version 4.0.3  
 231 (OpenMx package version 2.18.1) (7, 8). A full description of the MCoTS model is given in McAdams *et al.* (5).

232

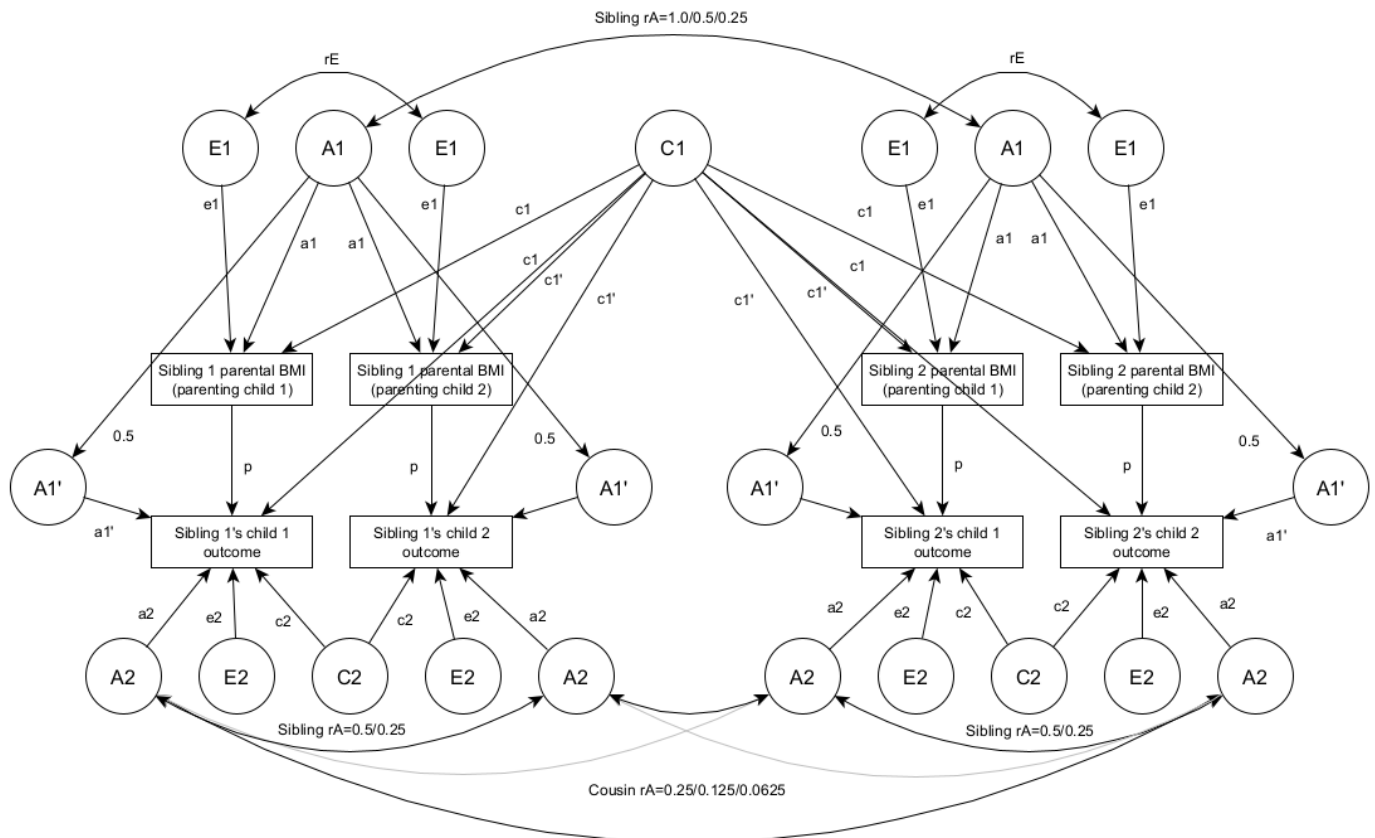

234

235 Sibling 1 and sibling 2 are full siblings, half siblings, dizygotic twins or monozygotic twins, in the parent generation.  
 236 Outcomes are included for up to two children of each parental sibling, and parental BMI is allowed to vary between  
 237 pregnancies via the correlation  $rE$ . Genetic correlations are set according to quantitative genetic theory (6). Additive  
 238 genetic correlations between sibling pairs (Sibling  $rA$ ) are set at 1.0, 0.5 or 0.25 for monozygotic twins, dizygotic  
 239 twins/full siblings and half siblings respectively. Additive genetic correlations between cousin pairs (Cousin  $rA$ ) are  
 240 set at 0.25, 0.125 or 0.0625 for cousins related via monozygotic twins, dizygotic twins/full siblings and half siblings  
 241 respectively. Latent (unmeasured) variables are shown in circles, measured variables are shown in rectangles, single  
 242 headed arrows denote causal paths, and double headed arrows denote covariances. A1: additive genetic effects on  
 243 parental BMI, C1: shared environmental effects on parental BMI, E1: nonshared environmental effects on parental  
 244 BMI, A1': genetic effects common to parental BMI and offspring outcome, C1: extended family effects, A2: additive  
 245 genetic effects specific to the offspring outcome, C2: shared environmental effects on offspring outcome, E2:  
 246 nonshared environmental effect on offspring outcome, p: "phenotypic" effect, including any causal effect of  
 247 parental BMI on the offspring outcome, as well as residual (non-genetic) confounding,  $rE$ : within-parent correlation  
 248 between E1 for parenting child 1 and child 2. The path between A1 and A1' is fixed to 0.5, because parents share  
 249 50% of their genome identical by descent with their children. For simplicity, variance paths have been omitted, but  
 250 variance was 1 for all latent variables. Consequently, for A1' residual variance after accounting for the path between  
 251 A1' and A1 is 0.75. MCoTS SEM were fit in R version 4.0.3 (OpenMx package version 2.18.1) (7, 8). A full description  
 252 of the MCoTS model is given in McAdams *et al.* (5).



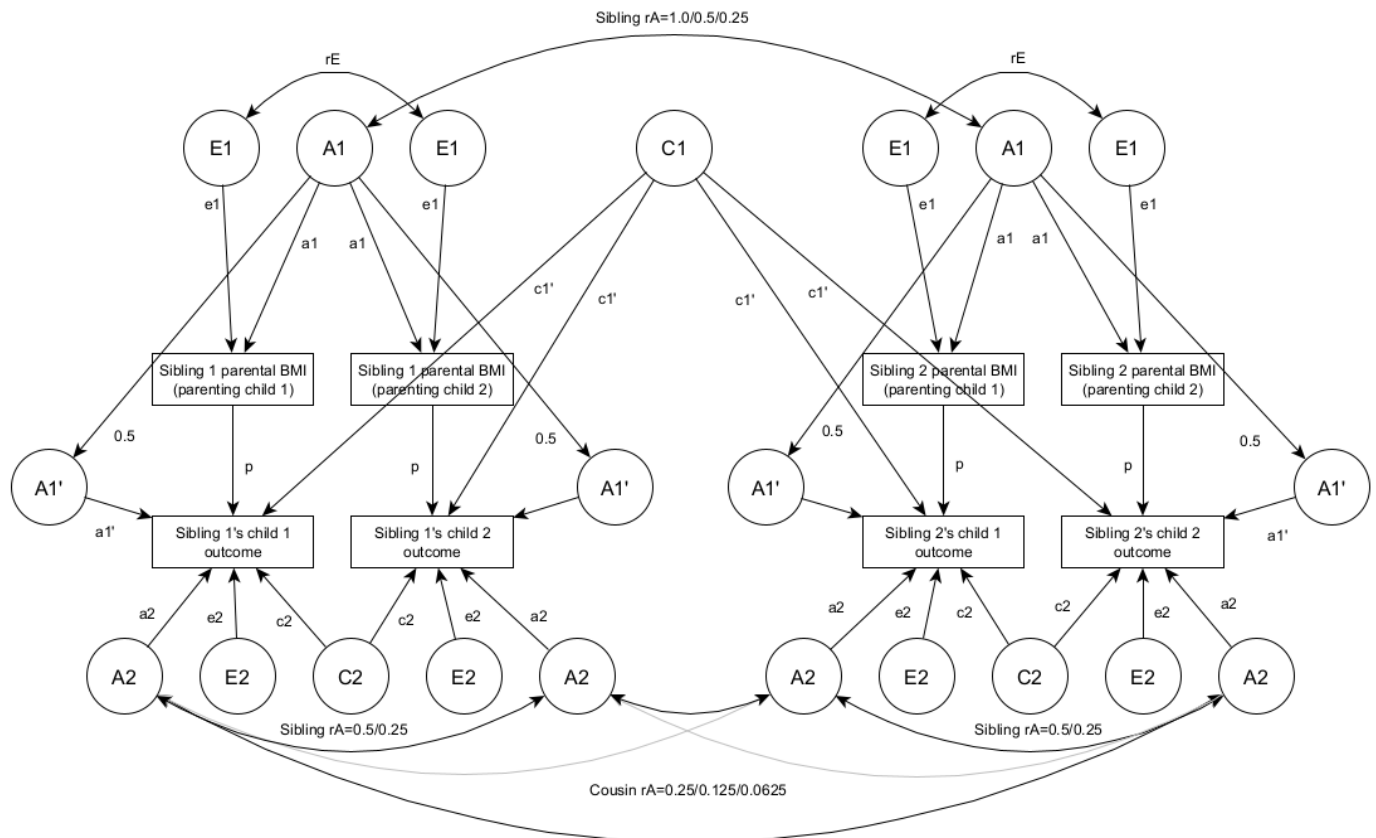

254

255 Sibling 1 and sibling 2 are full siblings, half siblings, dizygotic twins or monozygotic twins, in the parent generation.  
 256 Outcomes are included for up to two children of each parental sibling, and parental BMI is allowed to vary between  
 257 pregnancies via the correlation  $rE$ . Genetic correlations are set according to quantitative genetic theory (6). Additive  
 258 genetic correlations between sibling pairs (Sibling  $rA$ ) are set at 1.0, 0.5 or 0.25 for monozygotic twins, dizygotic  
 259 twins/full siblings and half siblings respectively. Additive genetic correlations between cousin pairs (Cousin  $rA$ ) are  
 260 set at 0.25, 0.125 or 0.0625 for cousins related via monozygotic twins, dizygotic twins/full siblings and half siblings  
 261 respectively. Latent (unmeasured) variables are shown in circles, measured variables are shown in rectangles, single  
 262 headed arrows denote causal paths, and double headed arrows denote covariances. A1: additive genetic effects on  
 263 parental BMI, E1: nonshared environmental effects on parental BMI, A1': genetic effects common to parental BMI  
 264 and offspring outcome, C1: extended family effects, A2: additive genetic effects specific to the offspring outcome,  
 265 C2: shared environmental effects on offspring outcome, E2: nonshared environmental effect son offspring outcome,  
 266  $p$ : "phenotypic" effect, including any causal effect of parental BMI on the offspring outcome, as well as residual (non-  
 267 genetic) confounding,  $rE$ : within-parent correlation between E1 for parenting child 1 and child 2. The path between  
 268 A1 and A1' is fixed to 0.5, because parents share 50% of their genome identical by descent with their children. For  
 269 simplicity, variance paths have been omitted, but variance was 1 for all latent variables. Consequently, for A1'  
 270 residual variance after accounting for the path between A1' and A1 is 0.75. MCoTS SEM were fit in R version 4.0.3  
 271 (OpenMx package version 2.18.1) (7, 8). A full description of the MCoTS model is given in McAdams *et al.* (5).

272

273 **Supplementary information S11: Liability threshold model for untransformed CEBQ outcomes**

274 Because several CEBQ outcomes were severely skewed, for the primary MCoTS analysis we regressed all CEBQ  
275 outcome variables on age and sex then applied a rank-based inverse normal transformation to the residuals. As a  
276 sensitivity analysis we instead applied a liability threshold MCoTS model to CEBQ outcomes that were recoded into  
277 three equally sized categories. Liability threshold models assume that a continuous, normally distributed liability  
278 captures all latent genetic and environmental determinants of the trait. The observed categorical outcome ( $Y$ ) is  
279 related to the continuous liability ( $Z$ ) by thresholds  $\tau_1$  and  $\tau_2$ , such that

280 
$$Y = \begin{cases} 2 & \text{if } Z \geq \tau_2 \\ 1 & \text{if } \tau_2 < Z < \tau_1 \\ 0 & \text{otherwise} \end{cases}$$

281 Liability threshold MCoTS SEM were fit in R version 4.0.3, similarly to the MCoTS models for continuous outcomes  
282 (OpenMx package version 2.18.1) (7, 8). The means vectors for offspring outcomes were fixed to zero and the  
283 outcome phenotypic variance was constrained to one, with  $\tau_1$  and  $\tau_2$  being freely estimated.

284

## Supplementary information S12: Differences in participant characteristics between baseline and 8 year old sample

| Variable                                       | Baseline sample              |      | 8 year sample |      | <i>P</i> <sub>difference</sub> |
|------------------------------------------------|------------------------------|------|---------------|------|--------------------------------|
|                                                | Mean                         | %    | Mean          | %    |                                |
| Parental characteristics                       |                              |      |               |      |                                |
| Maternal BMI (kg/m <sup>2</sup> )              | 24.1                         |      | 23.9          |      | 8.1e-16                        |
| Paternal BMI (kg/m <sup>2</sup> )              | 25.9                         |      | 25.8          |      | 4.4e-08                        |
| Maternal WHO BMI category (kg/m <sup>2</sup> ) | <18.5                        |      | 3.0           | 2.7  | 4.5e-31                        |
|                                                | 18.5–24.9                    |      | 65.6          | 66.9 |                                |
|                                                | 25–29.9                      |      | 21.8          | 21.7 |                                |
|                                                | ≥30                          |      | 9.6           | 8.6  |                                |
| Paternal WHO BMI category (kg/m <sup>2</sup> ) | <18.5                        |      | 0.2           | 0.2  | 5.5e-11                        |
|                                                | 18.5–24.9                    |      | 44.0          | 44.7 |                                |
|                                                | 25–29.9                      |      | 45.6          | 45.5 |                                |
|                                                | ≥30                          |      | 10.2          | 9.6  |                                |
| Parity (number of previous births)             | 0                            |      | 45.1          | 45.9 | 6.5e-09                        |
|                                                | 1                            |      | 35.9          | 35.6 |                                |
|                                                | 2                            |      | 14.9          | 14.6 |                                |
|                                                | 3                            |      | 3.2           | 3.0  |                                |
|                                                | 4+                           |      | 0.9           | 0.8  |                                |
| Maternal age at birth of child (years)         | ≤19                          |      | 0.7           | 0.5  | 4.0e-147                       |
|                                                | 20-24                        |      | 9.4           | 7.4  |                                |
|                                                | 25-29                        |      | 32.9          | 32.4 |                                |
|                                                | 30-34                        |      | 39.4          | 40.9 |                                |
|                                                | 35-39                        |      | 15.7          | 16.7 |                                |
|                                                | ≥40                          |      | 1.9           | 2.1  |                                |
| Maternal smoking during pregnancy              | No                           |      | 92.4          | 94.4 | 3.6e-130                       |
|                                                | Yes                          |      | 7.6           | 5.6  |                                |
| Paternal smoking during pregnancy              | No                           |      | 76.4          | 78.4 | 8.5e-54                        |
|                                                | Yes                          |      | 23.6          | 21.6 |                                |
| Maternal educational attainment                | Incomplete upper 2° school   |      | 0.2           | 0.2  | <2.2e-308                      |
|                                                | Upper 2° school              |      | 1.8           | 1.0  |                                |
|                                                | High school/junior college   |      | 27.9          | 23.5 |                                |
|                                                | University/college, 4 years  |      | 42.3          | 45.0 |                                |
|                                                | University/college, >4 years |      | 26.3          | 28.9 |                                |
|                                                | Other                        |      | 1.6           | 1.4  |                                |
| Maternal income                                | No income                    |      | 2.3           | 1.7  | 1.5e-198                       |
|                                                | <150,000 NOK                 |      | 15.1          | 13.0 |                                |
|                                                | 150,000–199,999 NOK          |      | 11.1          | 9.9  |                                |
|                                                | 200,000–299,999 NOK          |      | 34.3          | 34.6 |                                |
|                                                | 300,000–399,999 NOK          |      | 25.6          | 28.1 |                                |
|                                                | 400,000–499,999 NOK          |      | 7.1           | 7.7  |                                |
|                                                | >500,000 NOK                 |      | 4.5           | 4.9  |                                |
| Parental language                              | Norwegian                    |      | 89.1          | 90.0 | 1.3e-17                        |
|                                                | Other                        |      | 10.9          | 10.0 |                                |
| Offspring characteristics                      |                              |      |               |      |                                |
| Gestational age (weeks)                        |                              | 39.8 | 39.8          |      | 4.7e-17                        |
| Birth weight (g)                               |                              | 3563 | 3572          |      | 3.9e-07                        |

286

287

288

289

290

Statistics are for the “Baseline” sample used for linear regression analyses of birth weight ( $n = 85,866$ ), and an “8 year” sample similar to that used for linear regression analyses of 8 year BMI ( $n = 46,539$ ). *P*<sub>difference</sub>: for continuous variables: *P*-value from a linear regression model testing the null hypothesis that variables have equal mean in both samples; for categorical variables: *P*-value from a chi squared test of the null hypothesis that variables are equally distributed in both samples, **NOK**: Norwegian Krone

291

### Supplementary information S13: Linear associations between parental BMI and offspring predicted BMI

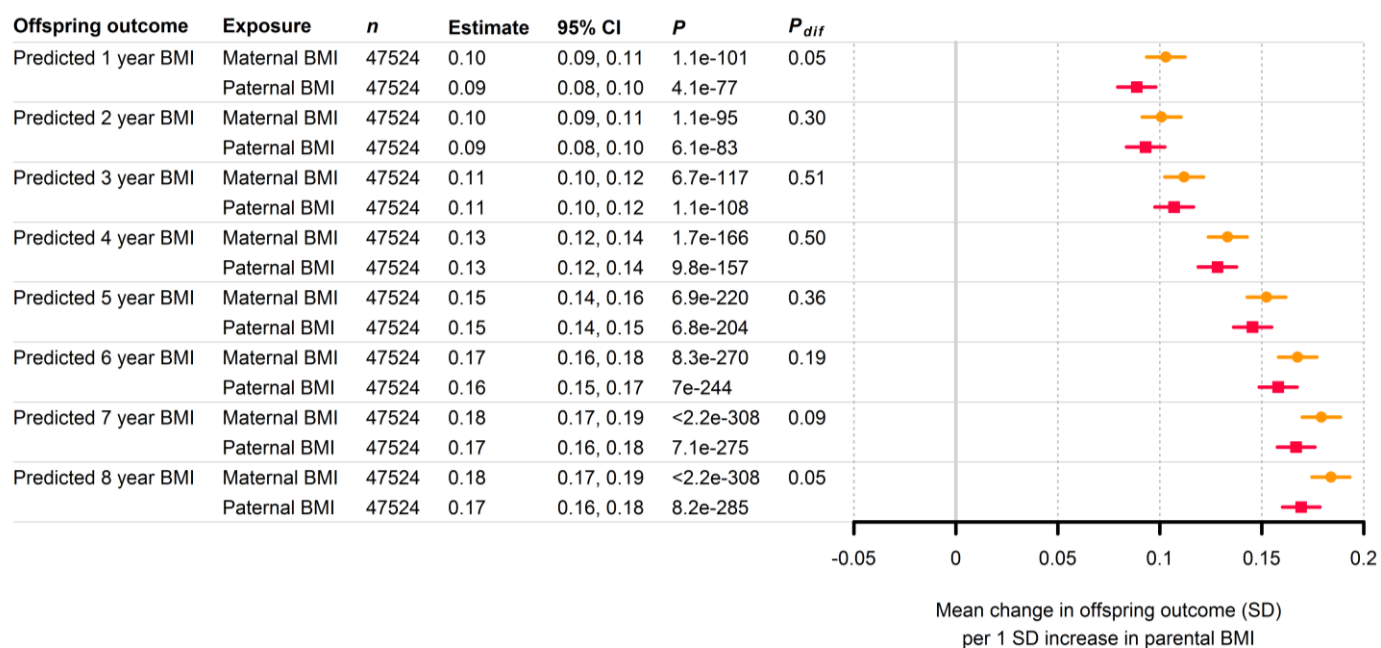

292

293

294

### Supplementary information S14: Linear associations between offspring 8 year BMI and CEBQ outcomes

| CEBQ outcome                 | Beta <sup>a</sup> | Lower 95% CI | Upper 95% CI | <i>P</i>  |
|------------------------------|-------------------|--------------|--------------|-----------|
| CEBQ: food responsiveness    | 0.37              | 0.36         | 0.38         | <2.2e-308 |
| CEBQ: fussiness              | -0.09             | -0.10        | -0.08        | 8.2e-72   |
| CEBQ: satiety responsiveness | -0.26             | -0.27        | -0.25        | <2.2e-308 |
| CEBQ: slow eating            | -0.14             | -0.15        | -0.13        | 6.7e-164  |
| CEBQ: emotional overeating   | 0.16              | 0.15         | 0.17         | 3.1e-180  |
| CEBQ: emotional undereating  | 0.00              | -0.01        | 0.01         | 0.44      |

295

296

297

298

299

a: regression coefficient from regression of offspring 8 year CEBQ outcome (regressed on offspring age and sex prior to inverse normalization of the residuals) on offspring 8 year BMI (z-score), adjusting for offspring age and sex, maternal parity, maternal and paternal covariates (age, smoking during pregnancy, educational attainment and income), parental language and grandparental language

## Supplementary information S15: Statistical interaction between maternal and paternal BMI

| Offspring outcome                                    | Maternal BMI (z score) <sup>a</sup> |              |              |          | Paternal BMI (z score) <sup>b</sup> |              |              |          | Maternal-paternal BMI interaction <sup>c</sup> |              |              |         |
|------------------------------------------------------|-------------------------------------|--------------|--------------|----------|-------------------------------------|--------------|--------------|----------|------------------------------------------------|--------------|--------------|---------|
|                                                      | Beta                                | Lower 95% CI | Upper 95% CI | P        | Beta                                | Lower 95% CI | Upper 95% CI | P        | Beta                                           | Lower 95% CI | Upper 95% CI | P       |
| Birth weight (z score)                               | 0.124                               | 0.116        | 0.132        | 8.4e-220 | 0.018                               | 0.010        | 0.025        | 5.5e-06  | -0.015                                         | -0.023       | -0.007       | 4.8e-07 |
| 6 month BMI (z score)                                | 0.090                               | 0.081        | 0.099        | 3.1e-89  | 0.061                               | 0.052        | 0.069        | 4.9e-43  | -0.011                                         | -0.020       | -0.003       | 1.1e-03 |
| 1 year BMI (z score)                                 | 0.104                               | 0.094        | 0.113        | 8e-101   | 0.075                               | 0.065        | 0.084        | 1.4e-55  | -0.011                                         | -0.020       | -0.001       | 3.4e-03 |
| 2 year BMI (z score)                                 | 0.087                               | 0.074        | 0.100        | 2.5e-38  | 0.072                               | 0.059        | 0.085        | 6.7e-27  | -0.007                                         | -0.020       | 0.006        | 0.17    |
| 3 year BMI (z score)                                 | 0.083                               | 0.071        | 0.095        | 2.1e-42  | 0.082                               | 0.070        | 0.094        | 1.2e-43  | -0.005                                         | -0.017       | 0.007        | 0.31    |
| Log 5 year BMI (z score)                             | 0.142                               | 0.129        | 0.155        | 5.6e-101 | 0.134                               | 0.121        | 0.147        | 8.2e-98  | -0.004                                         | -0.017       | 0.009        | 0.47    |
| Log 8 year BMI (z score)                             | 0.202                               | 0.191        | 0.212        | 1e-302   | 0.179                               | 0.168        | 0.189        | 1.3e-252 | 0.002                                          | -0.008       | 0.013        | 0.60    |
| Predicted 1 year BMI (z score)                       | 0.107                               | 0.097        | 0.118        | 6.6e-86  | 0.094                               | 0.084        | 0.105        | 2.1e-70  | -0.012                                         | -0.023       | -0.002       | 3.9e-03 |
| Predicted 2 year BMI (z score)                       | 0.105                               | 0.094        | 0.116        | 1e-80    | 0.099                               | 0.088        | 0.109        | 5.4e-75  | -0.011                                         | -0.022       | 0.000        | 0.01    |
| Predicted 3 year BMI (z score)                       | 0.116                               | 0.106        | 0.127        | 2.8e-98  | 0.113                               | 0.102        | 0.123        | 1.8e-96  | -0.008                                         | -0.019       | 0.003        | 0.07    |
| Predicted 4 year BMI (z score)                       | 0.139                               | 0.128        | 0.149        | 1.7e-139 | 0.134                               | 0.123        | 0.145        | 8.5e-137 | -0.005                                         | -0.015       | 0.006        | 0.29    |
| Log predicted 5 year BMI (z score)                   | 0.159                               | 0.148        | 0.170        | 2.2e-185 | 0.151                               | 0.141        | 0.162        | 1.5e-176 | -0.005                                         | -0.015       | 0.006        | 0.29    |
| Log predicted 6 year BMI (z score)                   | 0.175                               | 0.164        | 0.185        | 1e-226   | 0.164                               | 0.154        | 0.175        | 5.8e-210 | -0.003                                         | -0.014       | 0.007        | 0.42    |
| Log predicted 7 year BMI (z score)                   | 0.187                               | 0.176        | 0.197        | 2.7e-261 | 0.173                               | 0.163        | 0.184        | 1.2e-236 | -0.004                                         | -0.014       | 0.007        | 0.39    |
| Log predicted 8 year BMI (z score)                   | 0.192                               | 0.181        | 0.202        | 2.5e-275 | 0.177                               | 0.166        | 0.187        | 1.9e-245 | -0.005                                         | -0.016       | 0.005        | 0.21    |
| CEBQ: food responsiveness (z score <sup>d</sup> )    | 0.089                               | 0.076        | 0.101        | 2.2e-44  | 0.063                               | 0.050        | 0.075        | 6.2e-25  | 0.003                                          | -0.010       | 0.015        | 0.58    |
| CEBQ: fussiness (z score <sup>d</sup> )              | -0.011                              | -0.023       | 0.002        | 0.10     | -0.007                              | -0.020       | 0.005        | 0.23     | 0.009                                          | -0.003       | 0.022        | 0.06    |
| CEBQ: satiety responsiveness (z score <sup>d</sup> ) | 0.013                               | 0.001        | 0.026        | 0.04     | -0.030                              | -0.043       | -0.018       | 9e-07    | -0.002                                         | -0.014       | 0.011        | 0.70    |
| CEBQ: slow eating (z score <sup>d</sup> )            | 0.013                               | 0.000        | 0.025        | 0.04     | -0.022                              | -0.034       | -0.009       | 4.1e-04  | 0.003                                          | -0.009       | 0.016        | 0.53    |
| CEBQ: emotional undereating (z score <sup>d</sup> )  | -0.029                              | -0.041       | -0.016       | 9.9e-06  | -0.012                              | -0.025       | 0.001        | 0.05     | 0.008                                          | -0.005       | 0.020        | 0.14    |
| CEBQ: emotional overeating (z score <sup>d</sup> )   | 0.039                               | 0.027        | 0.052        | 1e-09    | 0.019                               | 0.007        | 0.032        | 1.7e-03  | -0.001                                         | -0.013       | 0.012        | 0.90    |

301 **a**: regression coefficient from regression of offspring outcome on maternal BMI (z-score), adjusted for covariates as per the main linear regression analyses (Model 3), plus a maternal BMI ×  
302 paternal BMI interaction term, **b**: regression coefficient from regression of offspring outcome on paternal BMI (z-score), adjusted for covariates as per the main linear regression analyses  
303 (Model 3), plus a maternal BMI × paternal BMI interaction term, **c**: regression coefficient for the maternal BMI (z-score) × paternal BMI (z-score) interaction term, **d**: CEBQ outcomes were  
304 regressed on offspring age and sex prior to inverse normalization of the residuals

306  
307

**Supplementary information S16: MCoTS results for the association of parental BMI with offspring birth weight, adjusted for potential confounders**

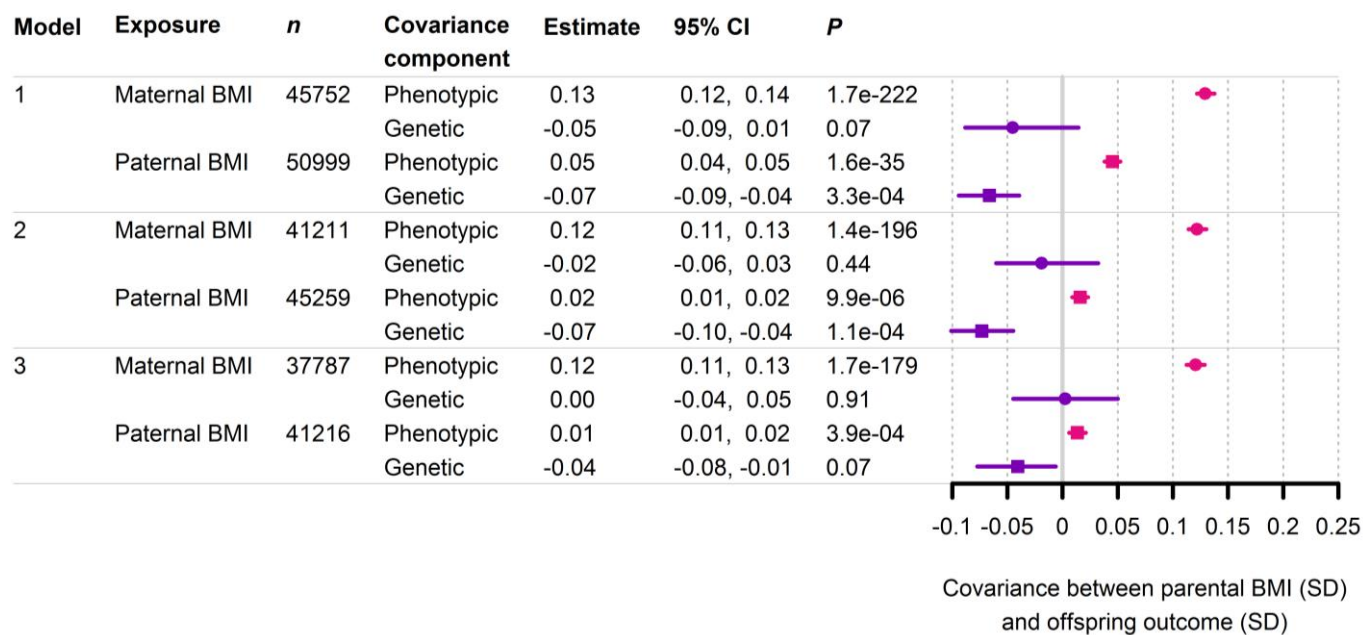

308  
309  
310  
311

**Model 1:** not adjusted for potential confounders (as per main MCoTS analyses), **Model 2:** exposure and outcome adjusted (via linear regression) for the other parent's BMI, **Model 3:** exposure and outcome adjusted (via linear regression) for the other parent's BMI and the index parent's age and income

312  
313

**Supplementary information S17: MCoTS results for the association of parental BMI with offspring birth weight and BMI**

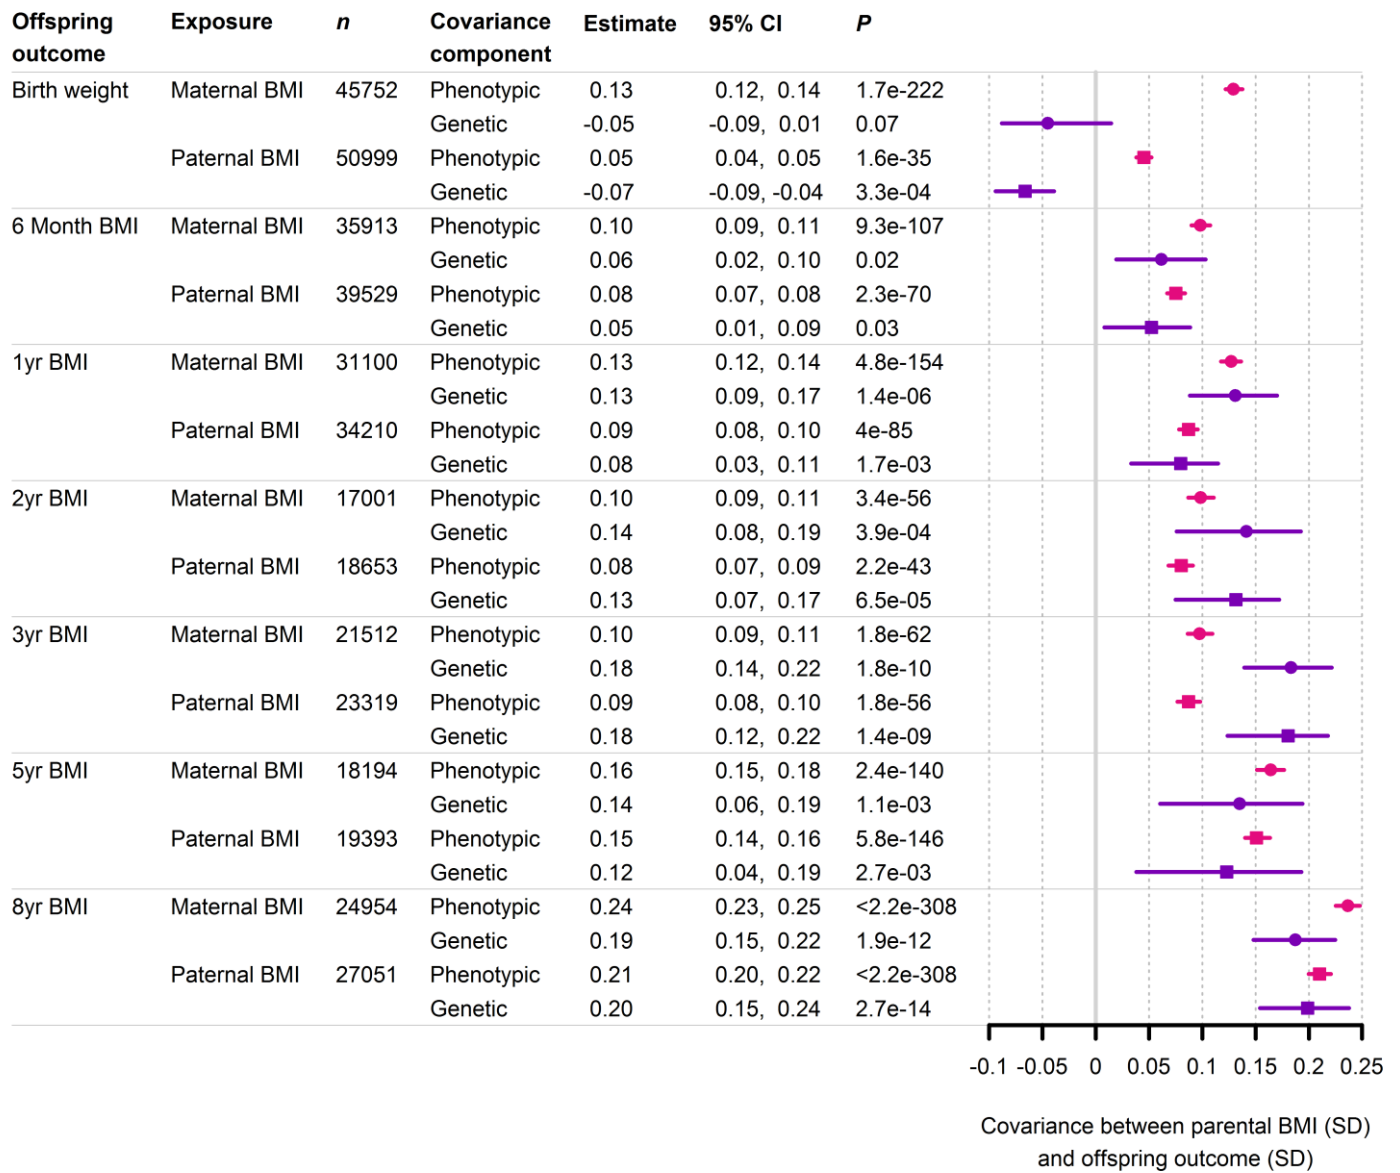

314

**Supplementary information S18: MCoTS results for the association of parental BMI with offspring predicted BMI**

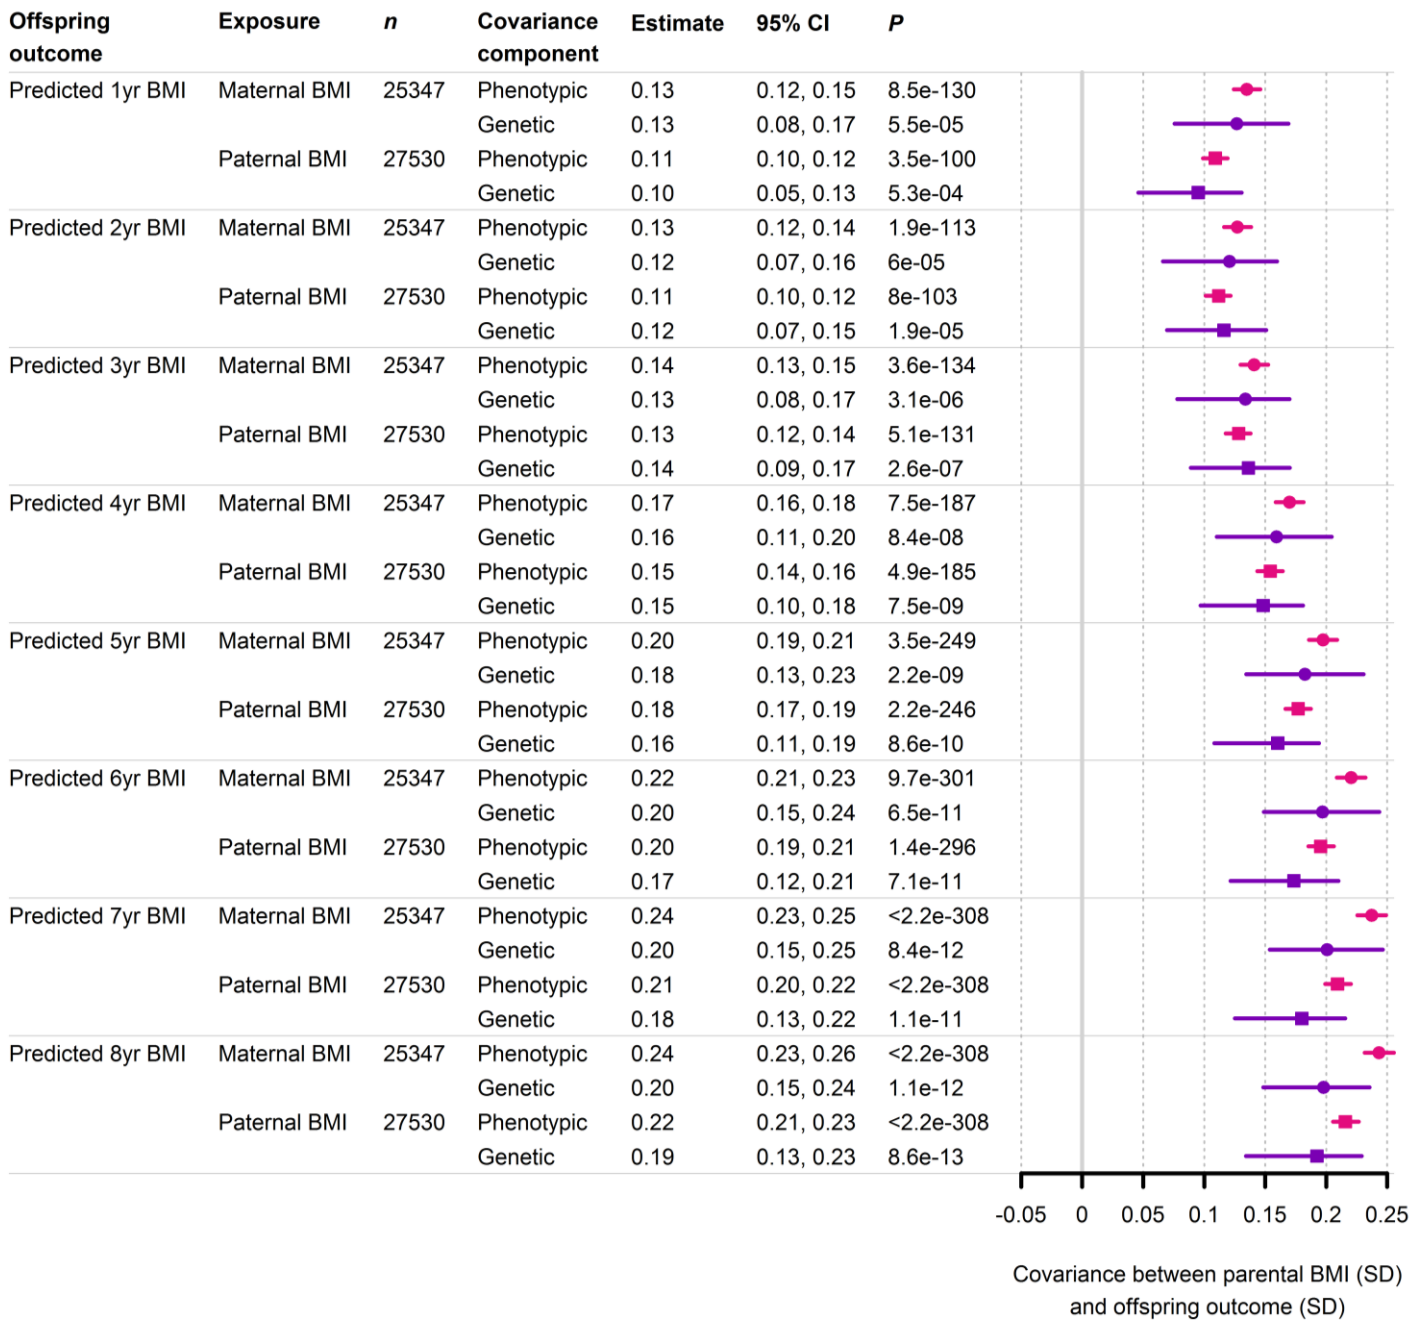



317

318

**Supplementary information S19: MCoTS results for the association of parental BMI with offspring weight, BMI and ponderal index at birth**

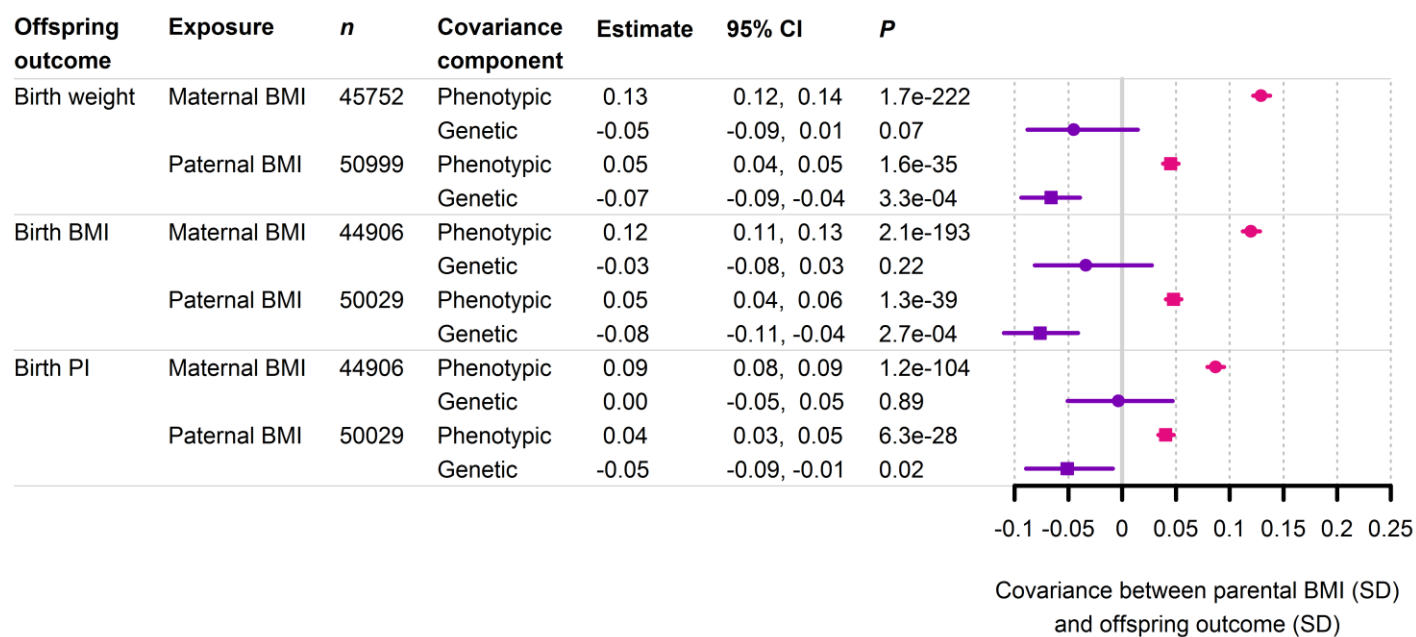

319

320

**Supplementary information S20: MCoTS results for the association of parental BMI with offspring eating**

321

**behaviour (CEBQ) traits**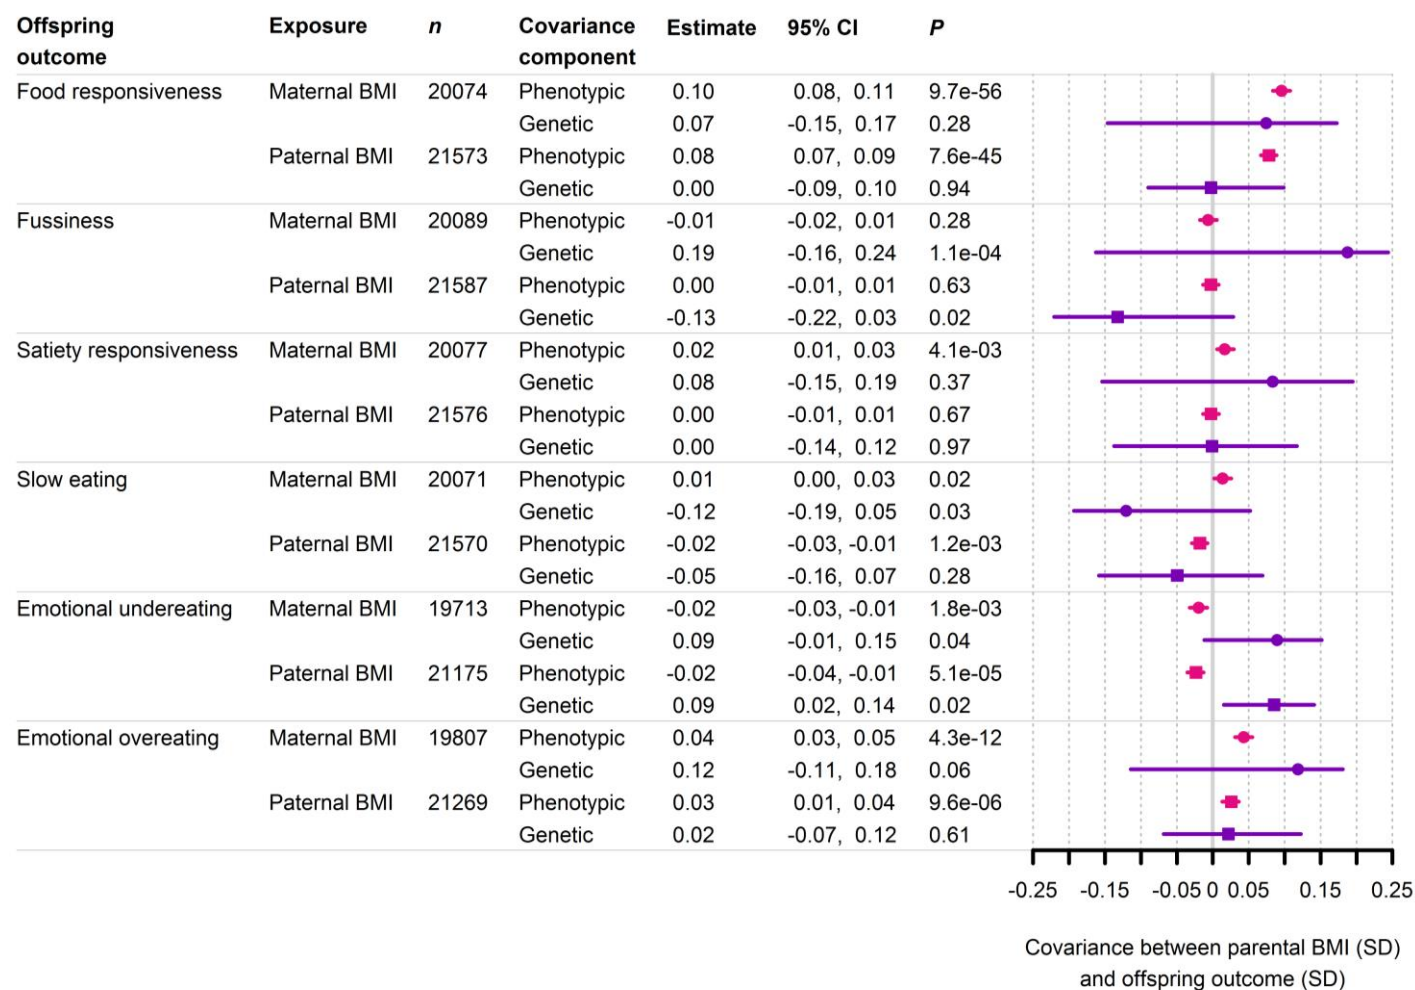

322

**Supplementary table S1:**

323

Full linear regression results for associations between exposures and outcomes (see separate excel file sup\_tables.xlsx).

324

325

326

**Supplementary table S2:**

327

Full MCoTS results including model fit statistics and estimated variance components for parental and offspring phenotypes (see separate excel file sup\_tables.xlsx).

328

329

330

**References**

331

1. Sovio U, Mook-Kanamori DO, Warrington NM, Lawrence R, Briollais L, Palmer CNA, et al. Association between Common Variation at the FTO Locus and Changes in Body Mass Index from Infancy to Late Childhood: The Complex Nature of Genetic Association through Growth and Development. *PLOS Genetics*. 2011;7(2):e1001307.

332

333

334

2. Pinheiro J, Bates D, R Core Team. nlme: Linear and Nonlinear Mixed Effects Models. R package version 31-149. 2022.

335

336

3. Pinheiro J, Bates D. Mixed-effects models in S and S-PLUS: Springer science & business media; 2006.

337

4. Irgens LM. The Medical Birth Registry of Norway. *Epidemiological research and surveillance throughout 30*

338

years. *Acta Obstet Gynecol Scand*. 2000;79(6):435-9.

- 339 5. McAdams TA, Hannigan LJ, Eilertsen EM, Gjerde LC, Ystrom E, Rijdsdijk FV. Revisiting the children-of-twins  
340 design: improving existing models for the exploration of intergenerational associations. *Behav Genet.*  
341 2018;48(5):397-412.
- 342 6. Lynch M, Walsh B. *Genetics and analysis of quantitative traits*. Sunderland, MA: Sinauer; 1998.
- 343 7. R Core Team. *R: A language and environment for statistical computing*. Vienna, Austria: R Foundation for  
344 Statistical Computing; 2020.
- 345 8. Neale MC, Hunter MD, Pritikin JN, Zahery M, Brick TR, Kirkpatrick RM, et al. OpenMx 2.0: Extended Structural  
346 Equation and Statistical Modeling. *Psychometrika*. 2016;81(2):535-49.

347

348
